# Supplementary material for: Enantioselective intramolecular [2 + 2] photocycloaddition using phosphoric acid as a chiral template
Source: Royal Society of Chemistry journal article supplement (doi:10.1039/d0ob02054k), 2020-01-01

## Enantioselective intramolecular [2+2] photocycloaddition using phosphoric acid as a chiral template

Ryukichi Takagi,\* Chihiro Tabuchi

*Department of Chemistry, Graduate School of Science, Hiroshima  
University, 1-3-1 Kagamiyama, Higashi-Hiroshima 739-8526, Japan  
rtakagi@hiroshima-u.ac.jp*

### Table of Contents

|                                                                                                                                               |     |
|-----------------------------------------------------------------------------------------------------------------------------------------------|-----|
| General Method.....                                                                                                                           | S2  |
| Typical procedure of preparation of chiral phosphoric acid <b>2</b> .....                                                                     | S2  |
| Preparation of quinolinone <b>3</b> .....                                                                                                     | S5  |
| Typical procedure of preparation of racemic cycloadduct <b>4</b> .....                                                                        | S6  |
| Reaction Apparatus.....                                                                                                                       | S6  |
| Characterization of the complex of<br>phosphoric acid <b>2a</b> and quinolinone <b>3a</b> using<br>NMR measurements and DFT calculations..... | S7  |
| Optimization of reaction conditions.....                                                                                                      | S10 |
| Computational data:<br>Cartesian coordinates, energies in Figs. 6 and S7.....                                                                 | S12 |
| References.....                                                                                                                               | S31 |
| HPLC traces.....                                                                                                                              | S33 |
| NMR Spectra of New Compounds.....                                                                                                             | S40 |

## General Method

Internal references for  $^1\text{H}$  NMR spectra were 0.0 ppm ( $\text{Me}_4\text{Si}$ ) for  $\text{CDCl}_3$  and  $\text{CD}_3\text{OD}$  (3.31 ppm). Chemical shifts for  $^{13}\text{C}$  NMR spectra were referenced to  $\text{CDCl}_3$  (77.0 ppm) and  $\text{CD}_3\text{OD}$  (49.86 ppm). Chemical shift for  $^{31}\text{P}$  NMR spectra were reported on the basis on 85%  $\text{H}_3\text{PO}_4$  (0.0 ppm) as an external standard. High resolution mass spectral (HRMS) data were recorded with a LTQ Orbitrap trap mass spectrometer using electrospray ionization (ESI) method. The enantiomeric excess (ee) of the products was determined by high performance liquid chromatography (HPLC) analysis on Chiralpak IC column ( $0.46 \times 25$  cm). Optical rotations were measured on a digital polarimeter with a 0.1 dm cell at room temperature. All reactions involving air- and moisture-sensitive reagents were carried out under  $\text{N}_2$ . All reactions were monitored by analytical thin-layer chromatography (TLC), which was visualized by ultraviolet light (254 nm).

### Typical procedure of preparation of chiral phosphoric acid **2f**

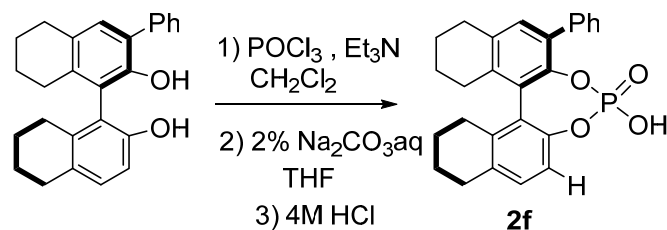

(*R*)-5,5',6,6',7,7',8,8'-Octahydro-3-phenyl-[1,1'-Binaphthalene]-2,2'-diol<sup>1</sup> (97.7 mg, 0.26 mmol) was dissolved in  $\text{CH}_2\text{Cl}_2$  (1.5 mL). To the mixture was added  $\text{Et}_3\text{N}$  (0.3 mL, 2.16 mmol) and  $\text{POCl}_3$  (0.2 mL, 2.15 mmol) at 0 °C. After the addition, the mixture was allowed to warm up to room temperature. After the stirring at room temperature for 18 h, the reaction mixture quenched with  $\text{H}_2\text{O}$ , then extracted with  $\text{CH}_2\text{Cl}_2$ . The organic layer were washed with  $\text{H}_2\text{O}$  and brine, dried over  $\text{Na}_2\text{SO}_4$ , filtered, and concentrated in vacuo. The crude product was purified by silica gel column chromatography (hexane/ $\text{EtOAc}$  = 10:1). After work up, the reaction mixture was dissolved in THF (4.0 mL) and 2%  $\text{Na}_2\text{CO}_3$  aq (5.0 mL) and refluxed for 21 h at 110 °C. After the refluxing, THF was remove by evaporation and the reaction mixture was neutralized by 1N HCl, then extracted with  $\text{CH}_2\text{Cl}_2$ . The organic layer were washed with  $\text{H}_2\text{O}$  and brine, dried over  $\text{Na}_2\text{SO}_4$ , filtered, and concentrated in vacuo. The crude product was purified by silica gel column chromatography ( $\text{CH}_2\text{Cl}_2/\text{MeOH}$  = 10 : 1). The resultant solid was dissolved in  $\text{CH}_2\text{Cl}_2$ , The

organic layer was washed with 4N HCl and water, and concentrated in vacuo to give the title compound in 80% yield as a colorless solid. mp 171-173 °C.  $[\alpha]^{26}_D -164.5$  ( $c = 1.00$ ,  $\text{CHCl}_3$ ).  $^1\text{H NMR}$  (400 MHz,  $\text{CDCl}_3$ )  $\delta$  7.53 (d,  $J = 7.5$  Hz, 2 H), 7.32 (t,  $J = 7.5$  Hz, 2 H), 7.24 (t,  $J = 7.5$  Hz, 1 H), 7.16 (s, 1 H), 7.10 (d,  $J = 8.2$  Hz, 1 H), 7.01 (d,  $J = 8.2$  Hz, 1 H), 2.93-2.74 (m, 4 H), 2.74-2.62 (m, 2 H), 2.39-2.23 (m, 2 H), 1.87-1.72 (m, 6 H), 1.67-1.52 (m, 2 H).  $^{13}\text{C NMR}$  (100 MHz,  $\text{CDCl}_3$ )  $\delta$  146.1 (d,  $J = 9.0$  Hz), 142.9 (d,  $J = 9.2$  Hz), 138.3, 137.6, 137.0, 135.6 (d,  $J = 2.0$  Hz), 135.4 (d,  $J = 2.2$  Hz), 131.7 (d,  $J = 3.5$  Hz), 131.2, 130.1, 129.5 (x2), 128.1 (x2), 127.2, 126.6, 126.3, 118.1 (d,  $J = 3.5$  Hz), 29.2 (x2), 27.9 (x2), 22.6, 22.5 (x2), 22.4.  $^{31}\text{P NMR}$  (160 MHz,  $\text{CDCl}_3$ )  $\delta$  2.28. HRMS (ESI+)  $m/z$  calcd for  $\text{C}_{26}\text{H}_{26}\text{O}_4\text{P}$   $[\text{M}+\text{H}]^+$  433.15632, found 433.15628.

### Preparation of chiral phosphoric acid **2g**<sup>2</sup>

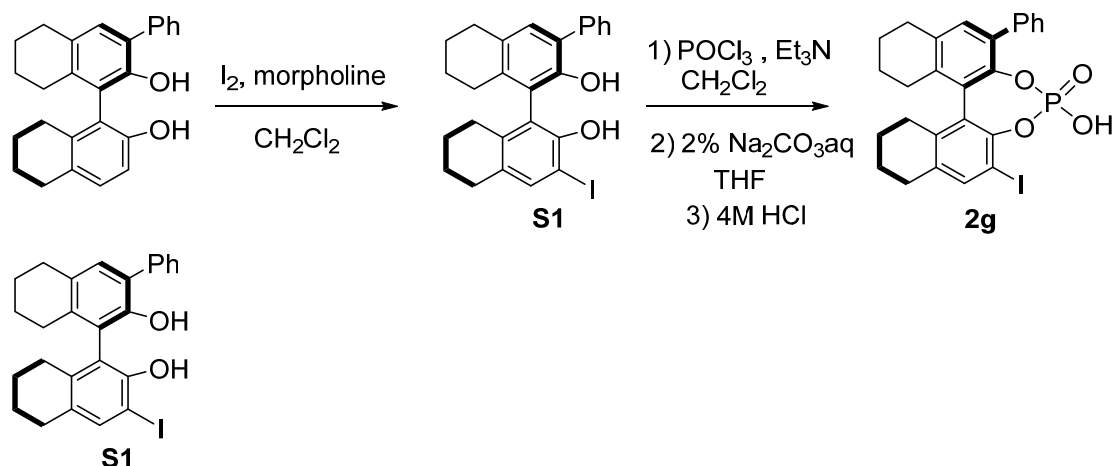

(*R*)-5,5',6,6',7,7',8,8'-Octahydro-3-phenyl-[1,1'-Binaphthalene]-2,2'-diol (250 mg, 0.68 mmol), and  $\text{I}_2$  (186 mg, 0.73 mmol) were dissolved in  $\text{CH}_2\text{Cl}_2$  (4.0 mL). To the mixture with stirring, was added morpholine (0.33 ml, 3.8 mmol) at room temperature. The reaction mixture was stirred for 23 h at room temperature. After being stirring, the reaction mixture quenched with sat.  $\text{Na}_2\text{S}_2\text{O}_3$ , then extracted with  $\text{CH}_2\text{Cl}_2$ . The organic layer were washed with  $\text{H}_2\text{O}$  and brine, dried over  $\text{Na}_2\text{SO}_4$ , filtered, and concentrated in vacuo. The combined crude product was purified by silica gel column chromatography (hexane/EtOAc = 5 : 1) to give **S1** in 86% yield as a colorless solid. mp 117-118 °C.  $[\alpha]^{25}_D -4.4$  ( $c = 1.00$ ,  $\text{CHCl}_3$ ).  $^1\text{H NMR}$  (400 MHz,  $\text{CDCl}_3$ )  $\delta$  7.55 (d,  $J = 7.4$  Hz, 2 H), 7.53 (s, 1 H), 7.43 (t,  $J = 7.4$  Hz, 2 H), 7.33 (t,  $J = 7.4$  Hz, 1 H), 7.13 (s, 1 H), 5.12 (s, 1 H), 4.77 (s, 1 H), 2.79 (t,  $J = 6.5$  Hz, 2 H), 2.73 (t,  $J = 6.1$  Hz, 2 H), 2.40-2.28 (m, 2 H), 2.23-2.11 (m, 2 H), 1.82-1.62 (m, 8 H).  $^{13}\text{C}$

NMR (100 MHz, CDCl<sub>3</sub>)  $\delta$  150.3, 147.7, 139.4, 138.0, 137.7, 136.3, 132.5, 131.7, 130.2, 129.2 (x2), 128.6 (x2), 127.3, 126.2, 120.5, 120.3, 80.5, 29.2, 28.9, 27.1 (x2), 23.0 (x2), 22.8, 22.7. HRMS (ESI+)  $m/z$  calcd for C<sub>26</sub>H<sub>25</sub>IO<sub>2</sub> [M+Na]<sup>+</sup> 519.07914, found 519.07898.

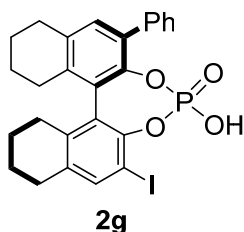

(*R*)-5,5',6,6',7,7',8,8'-Octahydro-3-iodo-3'-phenyl-[1,1'-Binaphthalene]-2,2'-diol **S1** (199 mg, 0.40 mmol) was dissolved in CH<sub>2</sub>Cl<sub>2</sub> (1.5 mL). To the mixture was added Et<sub>3</sub>N (0.3 mL, 2.16 mmol) and POCl<sub>3</sub> (0.2 mL, 2.15 mmol) at 0 °C. After the addition, the mixture was allowed to warm up to room temperature. After being stirring at room temperature for 23 h, the reaction mixture was quenched with H<sub>2</sub>O, then extracted with CH<sub>2</sub>Cl<sub>2</sub>. The organic layer was washed with H<sub>2</sub>O and brine, dried over Na<sub>2</sub>SO<sub>4</sub>, filtered, and concentrated in vacuo. The crude product was purified by silica gel column chromatography (hexane/EtOAc = 10 : 1). The resultant solid was dissolved in THF (5.0 mL) and 2% Na<sub>2</sub>CO<sub>3</sub> aq (10 ml) and refluxed for 21 h at 110 °C. After the refluxing, THF was removed by evaporation and the reaction mixture was neutralized by 1N HCl, and then extracted with CH<sub>2</sub>Cl<sub>2</sub>. The organic layer was washed with H<sub>2</sub>O and brine, dried over Na<sub>2</sub>SO<sub>4</sub>, filtered, and concentrated in vacuo. The crude product was purified by silica gel column chromatography (CH<sub>2</sub>Cl<sub>2</sub>/MeOH = 10 : 1). The resultant solid was extracted with CH<sub>2</sub>Cl<sub>2</sub>, and the organic layer was washed with 4N HCl and water, and concentrated in vacuo to give the title compound in 77% yield as a colorless solid. mp 233-234 °C. [ $\alpha$ ]<sub>D</sub><sup>28</sup> -216.0 ( $c$  = 1.00, CHCl<sub>3</sub>). <sup>1</sup>H NMR (400 MHz, CD<sub>3</sub>OD)  $\delta$  7.64 (s, 1 H), 7.61 (d,  $J$  = 7.9 Hz, 2 H), 7.39 (t,  $J$  = 7.9 Hz, 2 H), 7.31 (t,  $J$  = 7.9 Hz, 1 H), 7.21 (s, 1 H), 2.74-2.30 (m, 4 H), 2.73-2.62 (m, 2 H), 2.29-2.18 (m, 2 H), 1.88-1.72 (m, 6 H), 1.66-1.52 (m, 2 H). <sup>13</sup>C NMR (100 MHz, CD<sub>3</sub>OD)  $\delta$  146.6 (d,  $J$  = 9.0 Hz), 143.4 (d,  $J$  = 9.0 Hz), 139.0, 138.5, 137.3, 137.0, 136.9, 135.1, 131.9 (d,  $J$  = 2.9 Hz), 131.1, 129.3 (x2), 127.7 (x2), 127.5, 126.9 (x2), 85.0 (d,  $J$  = 4.2 Hz), 28.6, 28.3, 27.4, 27.3, 22.3, 22.2, 22.1, 22.0. <sup>31</sup>P NMR (160 MHz, CD<sub>3</sub>OD)  $\delta$  -0.68. HRMS (ESI+)  $m/z$  calcd for C<sub>26</sub>H<sub>24</sub>IO<sub>4</sub>P [M+Na]<sup>+</sup> 581.03491, found 581.03522.

### Preparation of quinolinone 3a-c,e-g

Quinolinones **3a**,<sup>3a</sup>, **e-g**<sup>3b</sup> were prepared according to reported procedures.

Quinolinone **3b** was prepared from 4,8-Dimethyl-2-quinoline<sup>3c</sup>.

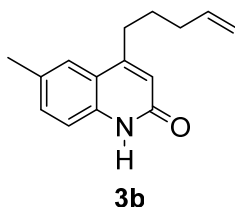

mp 138-139 °C. <sup>1</sup>H NMR (400 MHz, CDCl<sub>3</sub>) δ 11.14 (br, 1 H), 7.48 (s, 1 H), 7.32 (dd, *J* = 8.3, 1.5 Hz), 7.2 (d, *J* = 8.3 Hz, 1 H), 6.56 (s, 1 H), 5.92-5.81 (m, 1 H), 5.13-5.02 (m, 2 H), 2.85 (t, *J* = 7.8 Hz, 2 H), 2.44 (s, 3 H), 2.25-2.17 (m, 2 H), 1.89-1.78 (m, 2 H). <sup>13</sup>C NMR (100 MHz, CDCl<sub>3</sub>) δ 163.5, 152.6, 137.8, 136.3, 132.0, 131.7, 124.0, 119.7, 119.6, 116.3, 115.5, 33.3, 31.5, 27.8, 21.2. HRMS (ESI+) calcd for C<sub>15</sub>H<sub>18</sub>NO [M+H]<sup>+</sup> 228.13829, found 228.13837.

### Preparation of quinolinone 3d<sup>4</sup>

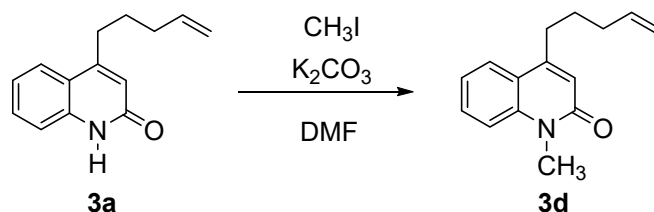

Quinolinone **3a** (206 mg, 0.98 mmol) and K<sub>2</sub>CO<sub>3</sub> (808 mg, 5.85 mmol) were mixed in DMF (5.0 mL) under N<sub>2</sub>. To the suspension was added iodomethane (0.5 mL, 8.0 mmol) and stirred at room temperature for 20 h. After the stirring, the mixture was concentrated in vacuo and added water, then extracted with diethyl ether. The organic layer were washed with sat. NaHCO<sub>3</sub> and brine, dried over Na<sub>2</sub>SO<sub>4</sub>, filtered, and concentrated in vacuo. The crude product was purified by silica gel column chromatography (hexane/EtOAc = 1 : 1) to give **3d** in 83% yield as a white solid. mp 40 °C. <sup>1</sup>H NMR (400 MHz, CDCl<sub>3</sub>) δ 7.74 (d, *J* = 8.0 Hz, 1 H), 7.60 (t, *J* = 7.8 Hz, 1 H), 7.39 (d, *J* = 8.4 Hz, 1 H), 7.26 (t, *J* = 7.6 Hz, 1 H), 6.61 (s, 1 H), 5.92-5.78 (m, 1 H), 5.12-4.99 (m, 2 H), 3.72 (s, 3 H), 2.83 (t, *J* = 7.8 Hz, 2 H), 2.25-2.16 (m, 2 H), 1.86-1.76 (m, 2 H). <sup>13</sup>C NMR (100 MHz, CDCl<sub>3</sub>) δ 162.2, 150.0, 140.1, 137.8, 130.3, 124.9, 121.8, 120.6, 120.2, 115.5, 114.6, 33.4, 31.3, 29.2, 27.9. HRMS (ESI+) *m/z* calcd for C<sub>15</sub>H<sub>17</sub>NO [M+Na]<sup>+</sup> 250.12024, found 250.12041.

### Typical procedure of preparation of racemic cycloadduct 4

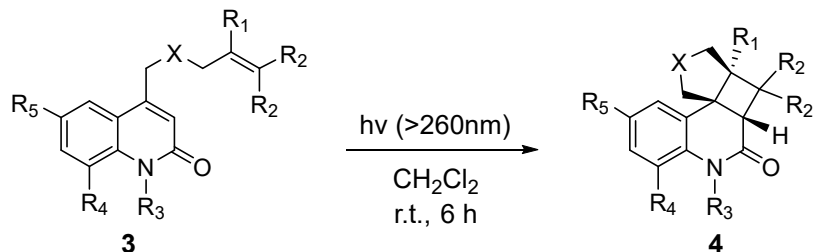

Quinolinone derivative **3** (25  $\mu\text{mol}$ ) were dissolved in  $\text{CH}_2\text{Cl}_2$  (0.25 mL, degassed by  $\text{N}_2$  bubbling) in NMR tube (under  $\text{N}_2$  gas, septum sealed). The solution was irradiated by 100 W high pressure mercury lamp. After 6 hours irradiation, the solvent was removed by reduced pressure and the crude was purified by silica gel column chromatography to give racemic cycloadduct **4**.

### Reaction Apparatus

#### 100 W High pressure Hg-lamp

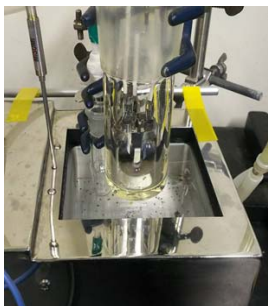

#### Image of apparatus

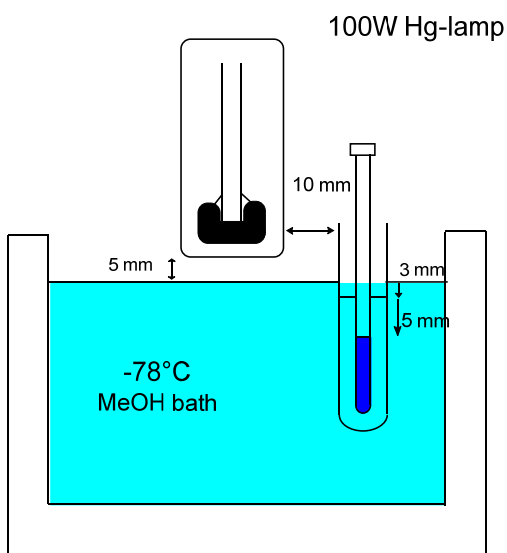

#### Pyrex test tube and lamp

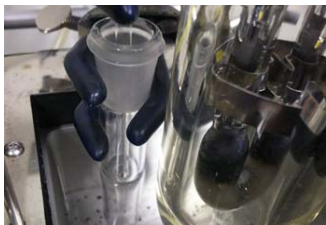

**Fig. S1** Reaction apparatus.

Characterization of the complex of phosphoric acid **2a** and quinolinone **3a** using NMR measurements and DFT calculations

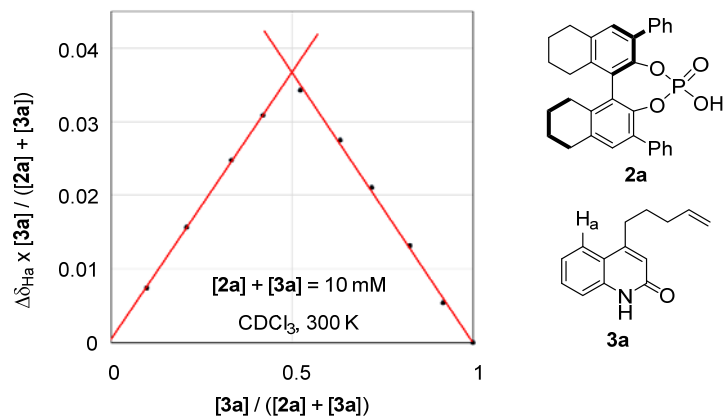

**Fig. S2** Stoichiometry determination in the complexation of **2a** and **3a** by Job's method.

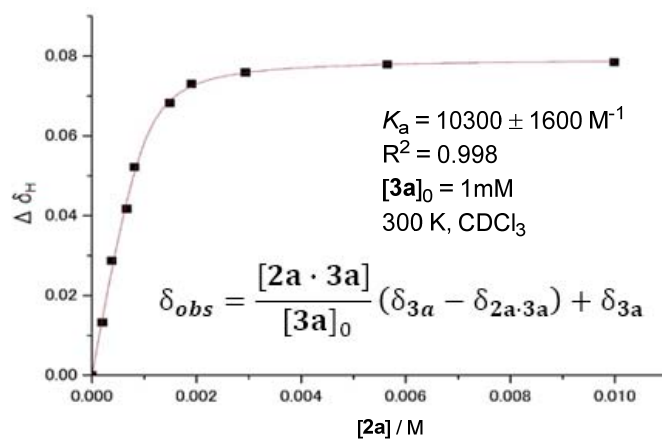

**Fig. S3** Determination of the association constant for the formation of the 1:1 complex of **2a** and **3a** via  $^1\text{H}$  NMR titration experiment.

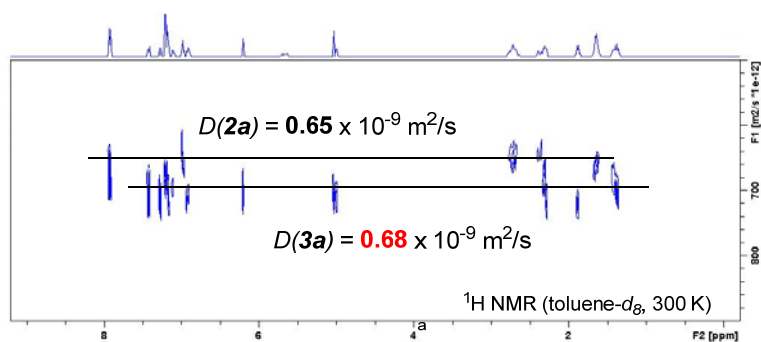

**Fig. S4** Determination of the association constant for the formation of the 1:1 complex of **2a** and **3a** via DOSY measurement in  $^1\text{H}$  NMR titration experiment.

|                                                                                      | 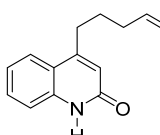<br><b>3a</b> | <br><b>2a</b> | <br><b>2a=3a</b>      |
|--------------------------------------------------------------------------------------|--------------------------------------------------------------------------------------------------|--------------------------------------------------------------------------------------------------|----------------------------------------------------------------------------------------------------------|
| <b>Diffusion coefficient</b><br>$(^1\text{H}$ NMR, 10 mM,<br>toluene- $d_8$ , 300 K) | $D = 0.98 \times 10^{-9} \text{ m}^2/\text{s}$                                                   | $D = 0.46 \times 10^{-9} \text{ m}^2/\text{s}$                                                   | $D(2a) = 0.65 \times 10^{-9} \text{ m}^2/\text{s}$<br>$D(3a) = 0.68 \times 10^{-9} \text{ m}^2/\text{s}$ |
| <b>Molar volume</b><br>(B3LYP/6-31G*)                                                | <b>290 Å<sup>3</sup></b>                                                                         | Monomer: <b>554 Å<sup>3</sup></b><br>Dimer: <b>1240 Å<sup>3</sup></b>                            | <b>721 Å<sup>3</sup></b>                                                                                 |

**Fig. S5** Diffusion coefficient in toluene- $d_8$  (10 mM) at 300 K and molar volume calculated at the B3LYP/6-31G\* level of theory of **2a**, **3a** and the 1:1 complex of **2a** and **3a**.



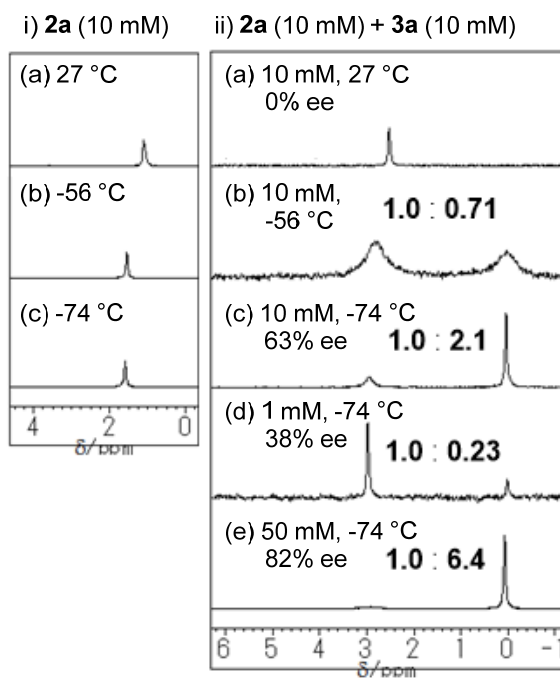

**Fig. S6**  $^{31}\text{P}$  NMR spectra of (i) phosphoric acid **2a** and (ii) a mixture of **2a** and **3a** ( $2\mathbf{a}/3\mathbf{a} = 1:1$ ) in  $\text{CD}_2\text{Cl}_2$  at several conditions.

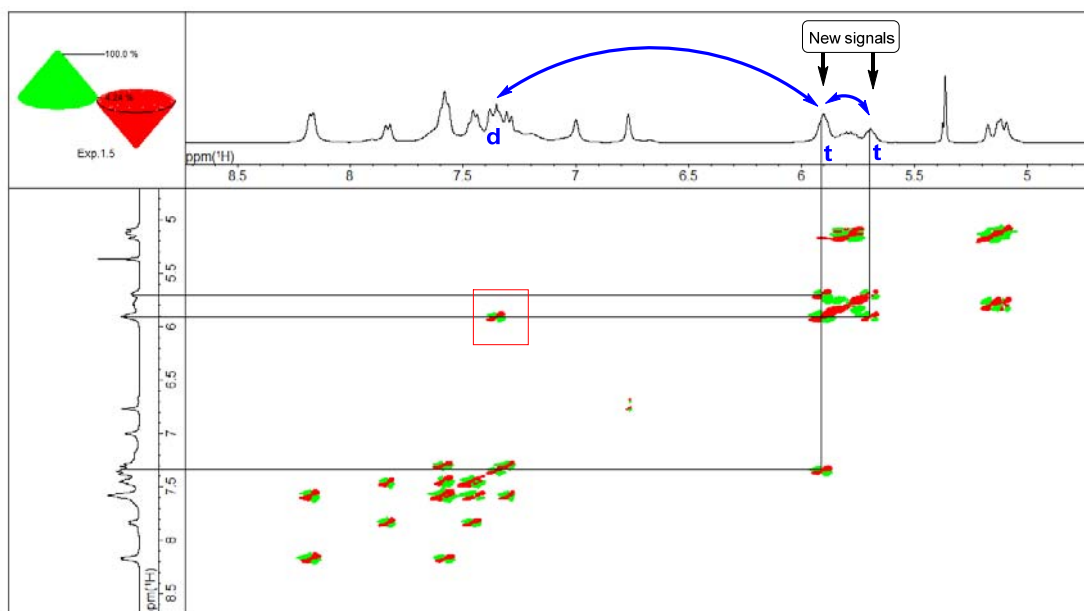

**Fig. S7**  $^1\text{H}$ - $^1\text{H}$  DQF-COSY spectrum of a mixture of **2a** and **3a** (50 mM,  $2\mathbf{a}/3\mathbf{a} = 1:1$ ) in  $\text{CD}_2\text{Cl}_2$  at -74 °C.

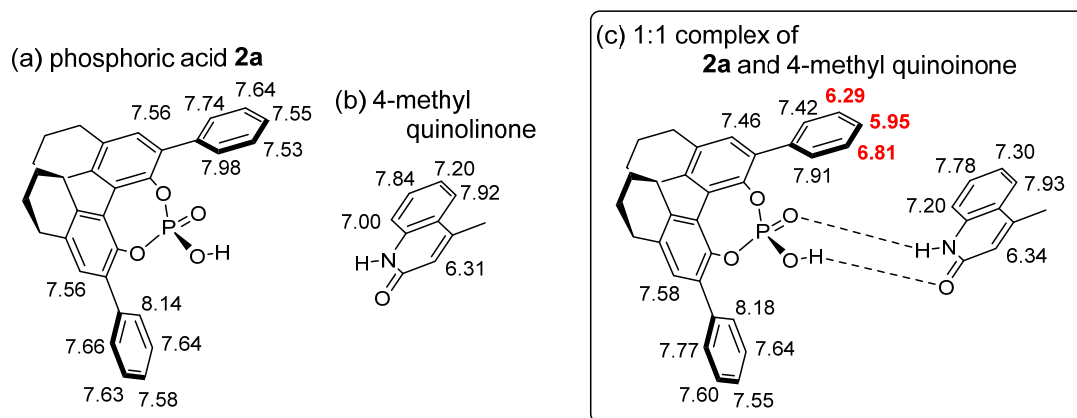

**Fig. S8** Speculated  $^1\text{H}$  NMR chemical shift using the GAIO method at HF/6-31G(d) of (a) phosphoric acid **2a**, (b) 4-methyl quinolinone, and (c) *Re*-form of the 1:1 complex of **2a** and 4-methyl quinolinone.

## Optimization of reaction conditions

**Table S1** Time profile of the photocycloaddition of **3a** using **2a**<sup>a</sup>

| irradiation time | <b>3a</b> : <b>4a</b> <sup>b</sup> | ee (%) <sup>c</sup> |
|------------------|------------------------------------|---------------------|
| 1 h              | 90 : 10                            | 59                  |
| 7.5 h            | 56 : 44                            | 83                  |
| 12 h             | 43 : 57                            | 85                  |
| 18 h             | 29 : 71                            | 88                  |
| 24 h             | 17 : 83                            | 87                  |
| 40 h             | 14 : 86                            | 84                  |

<sup>a</sup> All reactions were conducted at a substrate concentration of 100 mM with 1.0 equiv of phosphoric acid **2a** in  $\text{CH}_2\text{Cl}_2$  at  $-78^\circ\text{C}$ . <sup>b</sup> Determined by  $^1\text{H}$  NMR measurement of crude product. <sup>c</sup> Determined by chiral stationary phase HPLC analysis.

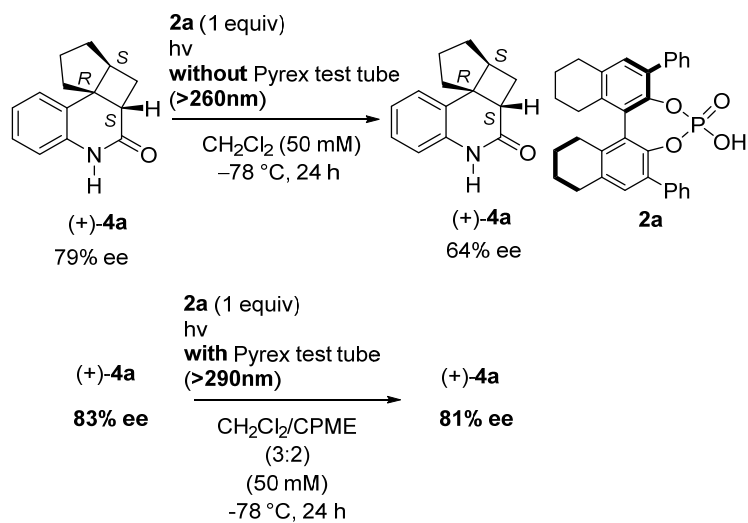

**Scheme S1** Recombination of the cyclobutane ring on **4a** under the photocycloaddition conditions.

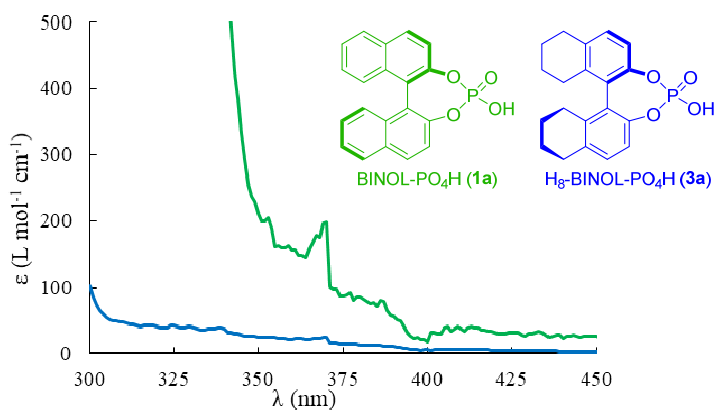

**Fig. S9** UV Absorption spectra of BINOL<sup>-</sup> and H<sub>8</sub>-BINOL-PO<sub>4</sub>H in benzene.

**Table S2** Screening of solvent in the photocycloaddition using **2a**<sup>a</sup>

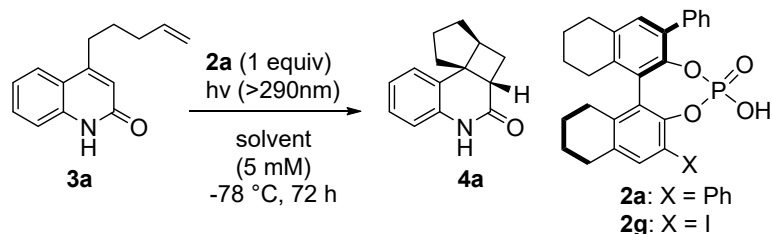

| Entry            | solvent                         | yield (%) <sup>b</sup> | ee (%) <sup>c</sup> |
|------------------|---------------------------------|------------------------|---------------------|
| 1 <sup>d,e</sup> | toluene                         | 94                     | 33                  |
| 2 <sup>d</sup>   | CH <sub>2</sub> Cl <sub>2</sub> | 95                     | 67                  |
| 3 <sup>d</sup>   | acetone                         | >95                    | 35                  |
| 4 <sup>d</sup>   | THF                             | >95                    | 7                   |
| 5 <sup>d</sup>   | MTBE                            | 61                     | 68                  |
| 6 <sup>f</sup>   | CPME                            | >95                    | 60                  |

<sup>a</sup> All reactions were conducted at a substrate concentration of 5 mM with 1.0 equiv of phosphoric acid **2a** at  $-78^\circ\text{C}$ . <sup>b</sup> Isolated yield. <sup>c</sup> Determined by chiral stationary phase HPLC analysis. <sup>d</sup> A mixture of **2a** and **2g** (**2a/2g** = 9:1) was used for the reaction as a chiral template. <sup>e</sup> The reaction mixture was irradiated for 48 h. <sup>f</sup> A 10 mM solution of **3a** in CPME was used for the reaction. MTBE = methyl *tert*-butyl ether. CPME = cyclopentyl methyl ether.

### Computational data: Cartesian coordinates, energies in Figs. 6 and S7.<sup>5</sup>

The relative Gibbs energies in Fig. 6 were estimated after the correction of basis set superposition errors (BSSE)<sup>6</sup> using the counterpoise method.<sup>7,8</sup>

### 4-Methyl quinolinone

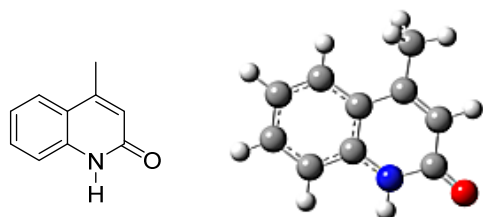

RB3LYP/6-31G(d)  
empirical dispersion=gd3

Number of Imaginary Frequencies = 0

Zero-point correction = 0.169179 a.u.

Thermal correction to Energy = 0.178475 a.u.

Thermal correction to Enthalpy = 0.179419 a.u.

Thermal correction to Gibbs Free Energy = 0.134850 a.u.

Sum of electronic and zero-point Energies = -516.337496 a.u.

Sum of electronic and thermal Energies = -516.328199 a.u.

Sum of electronic and thermal Enthalpies = -516.327255 a.u.

Sum of electronic and thermal Free Energies = -516.371825 a.u.

---

| Center | Atomic | Forces (Hartrees/Bohr) |              |              |
|--------|--------|------------------------|--------------|--------------|
| Number | Number | X                      | Y            | Z            |
| 1      | 1      | -0.00000604            | -0.000006947 | 0.000006888  |
| 2      | 6      | 0.000003024            | 0.000036410  | -0.000012194 |
| 3      | 6      | 0.000003487            | -0.000019335 | 0.000018755  |
| 4      | 6      | -0.000076583           | -0.000003227 | -0.000022522 |
| 5      | 6      | 0.000014382            | -0.000024199 | 0.000015646  |
| 6      | 6      | -0.000015704           | 0.000008871  | -0.000015585 |
| 7      | 6      | 0.000126605            | 0.000091546  | -0.000028091 |
| 8      | 1      | -0.000002622           | 0.000002960  | -0.000004220 |
| 9      | 1      | 0.000008636            | 0.000002921  | 0.000004120  |
| 10     | 1      | -0.000000771           | 0.000002207  | -0.000004736 |
| 11     | 6      | 0.000029521            | -0.000083219 | 0.000014231  |
| 12     | 6      | 0.000063811            | 0.000026755  | 0.000037435  |
| 13     | 1      | -0.000009961           | 0.000003919  | 0.000000583  |
| 14     | 6      | -0.000091033           | 0.000042319  | -0.000125286 |
| 15     | 7      | -0.000111081           | -0.000102778 | 0.000088576  |
| 16     | 8      | 0.000037937            | 0.000020110  | 0.000005196  |
| 17     | 6      | -0.000010043           | 0.000017182  | 0.000003715  |
| 18     | 1      | -0.000002506           | -0.000002299 | -0.000000531 |
| 19     | 1      | 0.000005219            | 0.000000907  | 0.000002061  |

---

|    |   |              |              |             |
|----|---|--------------|--------------|-------------|
| 20 | 1 | 0.000031735  | -0.000012214 | 0.000015557 |
| 21 | 1 | -0.000003449 | -0.000001886 | 0.000000405 |

---

### Phosphoric acid 2a

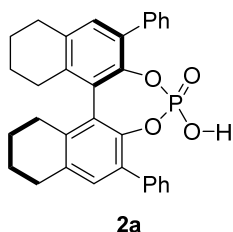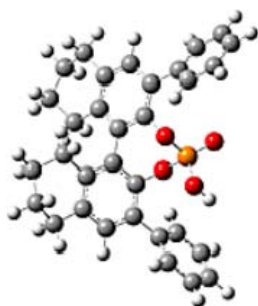

RB3LYP/6-31G(d)

empirical dispersion=gd3

Number of Imaginary Frequencies = 0

Zero-point correction = 0.540188 a.u.

Thermal correction to Energy = 0.570319 a.u.

Thermal correction to Enthalpy = 0.571264 a.u.

Thermal correction to Gibbs Free Energy = 0.478768 a.u.

Sum of electronic and zero-point Energies = -1878.783638 a.u.

Sum of electronic and thermal Energies = -1878.753507 a.u.

Sum of electronic and thermal Enthalpies = -1878.752563 a.u.

Sum of electronic and thermal Free Energies = -1878.845058 a.u.

---

| Center<br>Number | Atomic<br>Number | Forces (Hartrees/Bohr) |              |             |
|------------------|------------------|------------------------|--------------|-------------|
|                  |                  | X                      | Y            | Z           |
| 1                | 6                | 0.000005721            | 0.000000382  | 0.000001943 |
| 2                | 1                | 0.000000609            | 0.000000970  | 0.000000645 |
| 3                | 6                | -0.000000405           | -0.000004594 | 0.000003769 |
| 4                | 6                | -0.000001135           | -0.000003314 | 0.000002960 |
| 5                | 6                | -0.000006987           | 0.000003935  | 0.000001474 |
| 6                | 6                | -0.000002442           | 0.000002719  | 0.000003116 |

---

|    |    |              |              |              |
|----|----|--------------|--------------|--------------|
| 7  | 6  | 0.000007354  | 0.000005134  | -0.000002759 |
| 8  | 6  | 0.000009531  | 0.000002563  | -0.000005214 |
| 9  | 6  | -0.000004276 | -0.000004857 | -0.000004479 |
| 10 | 6  | -0.000001144 | -0.000002179 | -0.000003503 |
| 11 | 6  | 0.000000089  | -0.000000572 | 0.000004139  |
| 12 | 6  | -0.000006127 | -0.000001307 | 0.000001652  |
| 13 | 6  | 0.000008152  | 0.000001002  | -0.000000578 |
| 14 | 1  | -0.000000250 | 0.000000910  | -0.000001657 |
| 15 | 8  | -0.000002520 | -0.000006892 | -0.000016727 |
| 16 | 8  | -0.000001380 | -0.000006034 | 0.000011966  |
| 17 | 15 | 0.000006638  | 0.000016081  | 0.000002060  |
| 18 | 8  | 0.000005018  | -0.000000287 | 0.000001901  |
| 19 | 8  | -0.000004225 | -0.000001963 | 0.000005431  |
| 20 | 1  | -0.000000679 | -0.000000593 | -0.000003097 |
| 21 | 6  | -0.000001852 | 0.000002089  | -0.000001410 |
| 22 | 6  | 0.000000540  | 0.000000472  | 0.000002287  |
| 23 | 6  | 0.000000052  | 0.000001207  | 0.000002135  |
| 24 | 6  | -0.000000187 | 0.000001694  | 0.000000801  |
| 25 | 6  | -0.000000092 | 0.000001370  | 0.000001477  |
| 26 | 6  | 0.000000397  | 0.000001707  | 0.000001172  |
| 27 | 1  | 0.000000712  | 0.000001606  | 0.000001057  |
| 28 | 1  | -0.000000883 | 0.000000818  | 0.000000821  |
| 29 | 1  | -0.000000283 | 0.000001290  | 0.000001324  |
| 30 | 1  | 0.000000991  | 0.000001531  | 0.000001803  |
| 31 | 1  | 0.000000726  | 0.000001550  | 0.000001849  |
| 32 | 6  | 0.000001093  | 0.000002163  | -0.000000223 |
| 33 | 6  | 0.000000588  | -0.000000730 | -0.000001010 |
| 34 | 6  | 0.000001454  | -0.000002466 | -0.000002020 |
| 35 | 6  | -0.000001131 | -0.000000721 | -0.000001419 |
| 36 | 6  | 0.000000645  | -0.000001165 | -0.000001563 |
| 37 | 6  | 0.000001762  | -0.000000817 | -0.000000020 |
| 38 | 1  | 0.000000269  | -0.000001363 | -0.000000125 |
| 39 | 1  | 0.000000204  | -0.000002396 | -0.000000720 |
| 40 | 1  | 0.000000923  | -0.000001163 | -0.000000912 |
| 41 | 1  | 0.000001731  | -0.000001115 | -0.000000570 |
| 42 | 1  | 0.000001568  | -0.000001503 | -0.000000780 |

|    |   |              |              |              |
|----|---|--------------|--------------|--------------|
| 43 | 6 | -0.000003052 | 0.000002410  | -0.000000125 |
| 44 | 6 | -0.000001168 | -0.000001079 | -0.000003378 |
| 45 | 1 | -0.000000050 | -0.000000798 | 0.000000642  |
| 46 | 6 | 0.000001595  | -0.000000620 | 0.000001028  |
| 47 | 1 | -0.000000159 | 0.000000633  | 0.000000344  |
| 48 | 6 | -0.000001565 | -0.000002305 | -0.000001072 |
| 49 | 1 | -0.000000105 | 0.000000082  | 0.000000448  |
| 50 | 1 | 0.000000251  | -0.000001720 | 0.000000240  |
| 51 | 1 | -0.000000811 | -0.000000268 | 0.000000628  |
| 52 | 1 | -0.000000546 | 0.000000572  | 0.000000203  |
| 53 | 1 | -0.000002527 | -0.000002355 | -0.000001494 |
| 54 | 1 | -0.000001927 | 0.000000831  | 0.000000259  |
| 55 | 6 | 0.000000404  | -0.000000563 | 0.000000131  |
| 56 | 1 | -0.000000679 | 0.000000088  | 0.000000260  |
| 57 | 1 | -0.000000292 | -0.000000370 | -0.000000179 |
| 58 | 6 | -0.000001183 | 0.000001138  | 0.000000323  |
| 59 | 1 | -0.000000226 | 0.000000460  | 0.000000348  |
| 60 | 1 | 0.000000486  | -0.000000397 | 0.000000713  |
| 61 | 6 | -0.000002119 | 0.000001856  | 0.000000953  |
| 62 | 1 | -0.000001910 | 0.000000358  | -0.000000715 |
| 63 | 1 | -0.000001058 | -0.000000909 | -0.000001573 |
| 64 | 6 | -0.000000739 | -0.000002021 | -0.000003089 |
| 65 | 1 | -0.000001273 | 0.000000302  | -0.000000467 |
| 66 | 1 | -0.000002119 | -0.000000493 | -0.000001420 |

---

### Phosphoric acid 2f

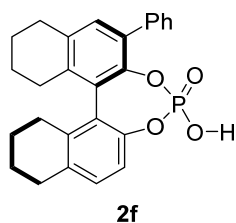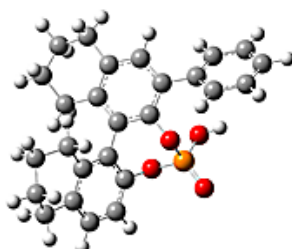

RB3LYP/6-31G(d)

empirical dispersion=gd3



Number of Imaginary Frequencies = 0  
 Zero-point correction = 0.458985 a.u.  
 Thermal correction to Energy = 0.484364 a.u.  
 Thermal correction to Enthalpy = 0.485308 a.u.  
 Thermal correction to Gibbs Free Energy = 0.403662 a.u.  
 Sum of electronic and zero-point Energies = -1647.797836 a.u.  
 Sum of electronic and thermal Energies = -1647.772457 a.u.  
 Sum of electronic and thermal Enthalpies = -1647.771513 a.u.  
 Sum of electronic and thermal Free Energies = -1647.853159 a.u.

---

| Center<br>Number | Atomic<br>Number | Forces (Hartrees/Bohr) |              |              |
|------------------|------------------|------------------------|--------------|--------------|
|                  |                  | X                      | Y            | Z            |
| 1                | 6                | -0.000005155           | -0.000002296 | 0.000002432  |
| 2                | 1                | -0.000002315           | 0.000001496  | 0.000003679  |
| 3                | 6                | 0.000001362            | -0.000002074 | -0.000000656 |
| 4                | 6                | 0.000003500            | -0.000000853 | -0.000002101 |
| 5                | 6                | 0.000001951            | 0.000007181  | 0.000003640  |
| 6                | 6                | -0.000004298           | 0.000003762  | 0.000007072  |
| 7                | 6                | -0.000007885           | -0.000001697 | 0.000001245  |
| 8                | 6                | -0.000006253           | -0.000004090 | -0.000001377 |
| 9                | 6                | 0.000004497            | -0.000004076 | 0.000002110  |
| 10               | 6                | 0.000004096            | -0.000005592 | 0.000000389  |
| 11               | 6                | 0.000000493            | 0.000004431  | -0.000001330 |
| 12               | 6                | 0.000004306            | 0.000007271  | -0.000001923 |
| 13               | 6                | -0.000005435           | -0.000002729 | -0.000004390 |
| 14               | 1                | 0.000000819            | -0.000000518 | -0.000002267 |
| 15               | 8                | 0.000003685            | -0.000004552 | 0.000002300  |
| 16               | 8                | 0.000000350            | 0.000001945  | 0.000002155  |
| 17               | 15               | -0.000005863           | -0.000001578 | 0.000001397  |
| 18               | 8                | -0.000003142           | -0.000001596 | 0.000002246  |
| 19               | 8                | 0.000000570            | -0.000002267 | -0.000000400 |
| 20               | 1                | -0.000001156           | -0.000003063 | 0.000002089  |
| 21               | 6                | -0.000000968           | -0.000001309 | 0.000001747  |
| 22               | 6                | 0.000000370            | -0.000000862 | -0.000000423 |

---

|    |   |              |              |              |
|----|---|--------------|--------------|--------------|
| 23 | 6 | 0.000001439  | -0.000001769 | 0.000000816  |
| 24 | 6 | -0.000001148 | -0.000001844 | -0.000000868 |
| 25 | 6 | 0.000000882  | -0.000004176 | 0.000000180  |
| 26 | 6 | -0.000002062 | -0.000001272 | 0.000000688  |
| 27 | 1 | -0.000000559 | 0.000000619  | 0.000000893  |
| 28 | 1 | 0.000000791  | -0.000003329 | -0.000001309 |
| 29 | 1 | -0.000000073 | -0.000003742 | -0.000000955 |
| 30 | 1 | -0.000000735 | -0.000000563 | 0.000001225  |
| 31 | 1 | -0.000000804 | -0.000003056 | 0.000000421  |
| 32 | 6 | 0.000002797  | 0.000000475  | -0.000002497 |
| 33 | 6 | 0.000001153  | -0.000001301 | -0.000000951 |
| 34 | 1 | 0.000000743  | 0.000000289  | -0.000001308 |
| 35 | 6 | -0.000001801 | 0.000001597  | 0.000001358  |
| 36 | 1 | -0.000001178 | 0.000003194  | 0.000002917  |
| 37 | 6 | 0.000001454  | 0.000002229  | 0.000001109  |
| 38 | 1 | 0.000000829  | 0.000002155  | -0.000001147 |
| 39 | 1 | 0.000001823  | -0.000001843 | -0.000004077 |
| 40 | 1 | 0.000000371  | 0.000003179  | 0.000000543  |
| 41 | 1 | -0.000000640 | 0.000002592  | 0.000001892  |
| 42 | 1 | 0.000002685  | -0.000000092 | -0.000003549 |
| 43 | 1 | 0.000000469  | -0.000000822 | -0.000001387 |
| 44 | 6 | 0.000000571  | 0.000002643  | -0.000000128 |
| 45 | 1 | 0.000000414  | 0.000003267  | -0.000000289 |
| 46 | 1 | 0.000000736  | 0.000004227  | -0.000000452 |
| 47 | 6 | -0.000000112 | 0.000005244  | 0.000001578  |
| 48 | 1 | -0.000000260 | 0.000004735  | 0.000001404  |
| 49 | 1 | -0.000000564 | 0.000004123  | 0.000001571  |
| 50 | 6 | 0.000002000  | 0.000000685  | -0.000002872 |
| 51 | 1 | 0.000001616  | -0.000000062 | -0.000002682 |
| 52 | 1 | 0.000001706  | 0.000000608  | -0.000002660 |
| 53 | 6 | 0.000001542  | -0.000001603 | -0.000002937 |
| 54 | 1 | 0.000001692  | -0.000001779 | -0.000003217 |
| 55 | 1 | 0.000002465  | -0.000000905 | -0.000004166 |
| 56 | 1 | -0.000001770 | -0.000000635 | 0.000003220  |

## Re-form of the 1:1 complex of 2a with 4-methyl quinolinone

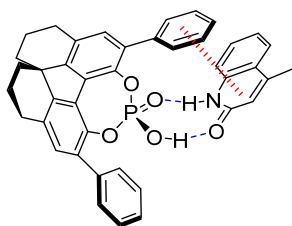

Re-form of complex of **2a**  
with 4-methyl quinolinone

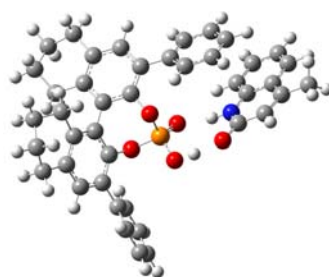

RB3LYP/6-31G(d)

empirical dispersion=gd3

Number of Imaginary Frequencies = 0

Zero-point correction = 0.710995 a.u.

Thermal correction to Energy = 0.751411 a.u.

Thermal correction to Enthalpy = 0.752355 a.u.

Thermal correction to Gibbs Free Energy = 0.636504 a.u.

Sum of electronic and zero-point Energies = -2395.171721 a.u.

Sum of electronic and thermal Energies = -2395.131305 a.u.

Sum of electronic and thermal Enthalpies = -2395.130361 a.u.

Sum of electronic and thermal Free Energies = -2395.246212 a.u.

BSSSE energy = 0.010665237821 a.u.

---

| Center<br>Number | Atomic<br>Number | Forces (Hartrees/Bohr) |              |              |
|------------------|------------------|------------------------|--------------|--------------|
|                  |                  | X                      | Y            | Z            |
| 1                | 6                | 0.000001089            | -0.000001306 | 0.000000760  |
| 2                | 1                | 0.000000310            | -0.000000079 | -0.000001352 |
| 3                | 6                | -0.000000781           | 0.000000265  | -0.000000777 |
| 4                | 6                | -0.000000317           | -0.000001435 | -0.000000991 |
| 5                | 6                | 0.000000645            | -0.000000264 | -0.000000008 |
| 6                | 6                | -0.000001581           | 0.000005542  | 0.000002136  |
| 7                | 6                | -0.000001236           | 0.000002283  | 0.000001065  |
| 8                | 6                | -0.000002920           | 0.000004455  | 0.000003589  |
| 9                | 6                | -0.000000138           | 0.000000403  | -0.000001493 |
| 10               | 6                | 0.000000639            | 0.000000961  | 0.000000188  |

---

|    |    |              |              |              |
|----|----|--------------|--------------|--------------|
| 11 | 6  | 0.000001393  | -0.000000721 | -0.000000039 |
| 12 | 6  | -0.000000289 | 0.000000243  | 0.000000921  |
| 13 | 6  | 0.000000081  | -0.000000911 | 0.000001258  |
| 14 | 1  | 0.000000291  | -0.000000013 | 0.000001206  |
| 15 | 8  | 0.000001387  | -0.000004574 | -0.000005603 |
| 16 | 8  | 0.000001844  | -0.000006445 | -0.000004449 |
| 17 | 15 | -0.000000809 | 0.000010634  | 0.000008581  |
| 18 | 8  | 0.000001780  | -0.000001437 | -0.000001616 |
| 19 | 6  | -0.000002253 | 0.000000136  | -0.000002454 |
| 20 | 6  | 0.000000266  | -0.000000112 | -0.000001773 |
| 21 | 6  | -0.000000570 | -0.000000333 | -0.000000237 |
| 22 | 6  | 0.000001545  | -0.000001675 | 0.000001494  |
| 23 | 6  | -0.000001048 | -0.000000408 | -0.000000844 |
| 24 | 6  | 0.000000391  | -0.000001465 | 0.000000251  |
| 25 | 1  | -0.000000704 | -0.000000173 | -0.000001032 |
| 26 | 1  | 0.000000498  | -0.000000764 | -0.000000430 |
| 27 | 1  | -0.000000154 | -0.000000878 | -0.000000307 |
| 28 | 1  | -0.000000549 | -0.000000253 | -0.000001468 |
| 29 | 1  | -0.000000113 | -0.000001060 | -0.000000591 |
| 30 | 6  | 0.000000971  | 0.000001339  | 0.000001631  |
| 31 | 6  | 0.000000640  | 0.000000075  | 0.000001524  |
| 32 | 6  | 0.000000042  | 0.000000243  | -0.000000441 |
| 33 | 6  | -0.000000085 | -0.000000047 | 0.000000959  |
| 34 | 6  | 0.000000531  | 0.000000728  | 0.000001585  |
| 35 | 6  | 0.000000237  | 0.000000837  | 0.000001431  |
| 36 | 1  | -0.000000018 | 0.000001901  | 0.000000922  |
| 37 | 1  | 0.000000652  | -0.000000010 | 0.000001170  |
| 38 | 1  | 0.000000777  | 0.000000222  | 0.000001475  |
| 39 | 1  | 0.000000298  | 0.000001012  | 0.000001137  |
| 40 | 1  | 0.000000540  | 0.000000828  | 0.000001504  |
| 41 | 6  | -0.000000269 | -0.000000335 | 0.000001299  |
| 42 | 6  | -0.000000241 | 0.000000203  | -0.000000420 |
| 43 | 1  | 0.000001246  | 0.000000097  | 0.000000139  |
| 44 | 6  | -0.000000093 | 0.000000153  | -0.000000732 |
| 45 | 1  | -0.000000580 | 0.000000584  | -0.000001208 |
| 46 | 6  | -0.000000509 | 0.000000547  | 0.000000192  |

|    |   |              |              |              |
|----|---|--------------|--------------|--------------|
| 47 | 1 | 0.000000302  | 0.000000675  | -0.000000193 |
| 48 | 1 | 0.000000875  | -0.000000270 | 0.000001685  |
| 49 | 1 | -0.000000330 | 0.000000756  | -0.000000520 |
| 50 | 1 | -0.000000342 | 0.000000496  | -0.000001071 |
| 51 | 1 | 0.000000895  | 0.000001243  | 0.000000287  |
| 52 | 1 | -0.000000551 | 0.000000503  | 0.000001023  |
| 53 | 6 | -0.000000033 | 0.000001012  | -0.000001023 |
| 54 | 1 | -0.000000456 | 0.000000512  | -0.000000157 |
| 55 | 1 | -0.000000387 | 0.000000895  | -0.000000113 |
| 56 | 6 | -0.000001073 | 0.000000811  | -0.000000628 |
| 57 | 1 | -0.000000521 | 0.000000736  | -0.000000952 |
| 58 | 1 | -0.000000444 | 0.000000926  | -0.000000554 |
| 59 | 6 | -0.000000348 | -0.000000635 | 0.000000507  |
| 60 | 1 | -0.000000287 | -0.000000016 | 0.000000168  |
| 61 | 1 | 0.000000272  | 0.000000276  | -0.000000160 |
| 62 | 6 | 0.000000938  | 0.000000417  | 0.000000339  |
| 63 | 1 | -0.000000037 | -0.000000653 | 0.000000579  |
| 64 | 1 | 0.000000127  | 0.000000034  | 0.000000295  |
| 65 | 1 | -0.000000060 | -0.000000738 | -0.000000597 |
| 66 | 6 | -0.000000229 | -0.000001562 | -0.000000663 |
| 67 | 6 | -0.000001153 | -0.000000313 | 0.000000901  |
| 68 | 6 | 0.000001132  | 0.000003428  | 0.000001249  |
| 69 | 6 | -0.000001606 | -0.000001029 | -0.000000945 |
| 70 | 6 | 0.000001379  | 0.000000952  | -0.000001781 |
| 71 | 6 | 0.000000150  | -0.000001791 | -0.000002056 |
| 72 | 1 | 0.000000283  | 0.000000404  | -0.000000875 |
| 73 | 1 | -0.000001113 | -0.000000426 | -0.000000095 |
| 74 | 1 | -0.000000185 | 0.000000226  | -0.000000548 |
| 75 | 6 | -0.000002187 | -0.000006325 | -0.000001694 |
| 76 | 6 | -0.000001053 | 0.000000760  | 0.000001757  |
| 77 | 1 | 0.000000174  | -0.000001702 | 0.000000190  |
| 78 | 6 | 0.000005229  | -0.000004951 | 0.000003777  |
| 79 | 7 | 0.000002100  | 0.000004083  | 0.000000819  |
| 80 | 8 | -0.000005349 | 0.000003840  | -0.000008773 |
| 81 | 6 | 0.000001645  | -0.000002820 | 0.000003148  |
| 82 | 1 | -0.000000050 | -0.000000200 | -0.000002067 |

|    |   |              |              |              |
|----|---|--------------|--------------|--------------|
| 83 | 1 | -0.000002007 | -0.000000317 | -0.000002680 |
| 84 | 1 | -0.000002569 | 0.000000031  | -0.000000226 |
| 85 | 8 | -0.000007068 | -0.000005265 | -0.000000315 |
| 86 | 1 | 0.000007802  | -0.000004076 | 0.000003822  |
| 87 | 1 | 0.000003299  | 0.000001076  | -0.000000011 |

---

***S<sub>i</sub>*-form of the 1:1 complex of 2a with 4-methyl quinolinone**

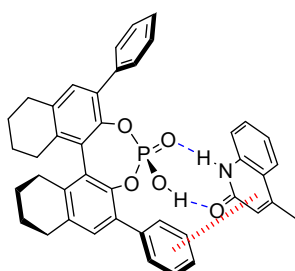

*S<sub>i</sub>*-form of complex of **2a**  
with 4-methyl quinolinone

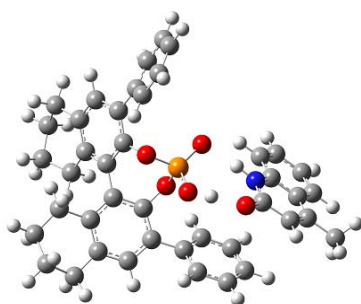

RB3LYP/6-31G(d)

empirical dispersion=gd3

Number of Imaginary Frequencies = 0

Zero-point correction = 0.710880 a.u.

Thermal correction to Energy = 0.751341 a.u.

Thermal correction to Enthalpy = 0.752285 a.u.

Thermal correction to Gibbs Free Energy = 0.635746 a.u.

Sum of electronic and zero-point Energies = -2395.170177 a.u.

Sum of electronic and thermal Energies = -2395.129716 a.u.

Sum of electronic and thermal Enthalpies = -2395.128772 a.u.

Sum of electronic and thermal Free Energies = -2395.245310 a.u.

BSSSE energy = 0.009609387408 a.u.

---

| Center<br>Number | Atomic<br>Number | Forces (Hartrees/Bohr) |             |              |
|------------------|------------------|------------------------|-------------|--------------|
|                  |                  | X                      | Y           | Z            |
| 1                | 6                | -0.000000885           | 0.000002151 | -0.000001734 |

---

|    |    |              |              |              |
|----|----|--------------|--------------|--------------|
| 2  | 1  | -0.000000445 | 0.000000937  | -0.000001078 |
| 3  | 6  | -0.000000549 | 0.000000829  | -0.000000474 |
| 4  | 6  | -0.000000428 | 0.000000463  | -0.000000143 |
| 5  | 6  | -0.000000720 | -0.000000449 | -0.000000007 |
| 6  | 6  | 0.000000407  | -0.000002160 | -0.000002113 |
| 7  | 6  | 0.000000086  | 0.000002062  | 0.000001020  |
| 8  | 6  | 0.000001285  | 0.000000939  | 0.000000236  |
| 9  | 6  | -0.000001704 | 0.000000598  | 0.000001078  |
| 10 | 6  | -0.000001580 | 0.000000012  | 0.000002194  |
| 11 | 6  | 0.000000711  | -0.000002184 | 0.000000258  |
| 12 | 6  | 0.000001253  | -0.000001660 | 0.000000736  |
| 13 | 6  | 0.000003349  | 0.000002303  | 0.000002005  |
| 14 | 1  | 0.000001263  | 0.000000002  | 0.000002012  |
| 15 | 8  | -0.000005059 | 0.000000675  | 0.000005120  |
| 16 | 8  | 0.000001095  | 0.000000194  | 0.000002878  |
| 17 | 15 | 0.000006252  | -0.000002233 | -0.000007685 |
| 18 | 8  | -0.000001719 | 0.000000866  | -0.000001052 |
| 19 | 6  | 0.000000081  | -0.000001202 | -0.000001049 |
| 20 | 6  | -0.000001029 | -0.000000635 | -0.000002960 |
| 21 | 6  | -0.000000616 | 0.000000550  | -0.000001680 |
| 22 | 6  | -0.000000711 | -0.000000600 | -0.000001297 |
| 23 | 6  | -0.000000444 | -0.000000998 | -0.000001538 |
| 24 | 6  | -0.000000945 | -0.000000324 | -0.000002085 |
| 25 | 1  | -0.000001362 | 0.000000964  | -0.000001830 |
| 26 | 1  | -0.000000082 | -0.000000501 | -0.000001034 |
| 27 | 1  | -0.000000317 | -0.000001630 | -0.000001818 |
| 28 | 1  | -0.000001328 | 0.000000052  | -0.000002601 |
| 29 | 1  | -0.000000879 | -0.000001171 | -0.000002616 |
| 30 | 6  | 0.000000226  | -0.000001226 | -0.000000676 |
| 31 | 6  | -0.000000017 | -0.000000362 | 0.000000613  |
| 32 | 6  | 0.000001648  | -0.000000027 | 0.000000599  |
| 33 | 6  | -0.000000159 | -0.000001218 | 0.000000753  |
| 34 | 6  | 0.000002226  | -0.000000986 | 0.000000870  |
| 35 | 6  | -0.000000938 | -0.000000711 | 0.000000303  |
| 36 | 1  | -0.000000276 | 0.000000405  | 0.000000586  |
| 37 | 1  | 0.000001114  | -0.000001011 | 0.000001660  |

|    |   |              |              |              |
|----|---|--------------|--------------|--------------|
| 38 | 1 | 0.000000988  | -0.000001462 | 0.000000960  |
| 39 | 1 | 0.000000106  | 0.000000111  | 0.000000437  |
| 40 | 1 | 0.000000398  | -0.000000765 | 0.000000033  |
| 41 | 6 | 0.000000783  | -0.000000731 | 0.000002335  |
| 42 | 6 | 0.000000831  | 0.000001083  | 0.000000983  |
| 43 | 1 | 0.000000463  | 0.000000481  | 0.000001631  |
| 44 | 6 | 0.000000034  | 0.000001965  | 0.000000155  |
| 45 | 1 | -0.000001494 | 0.000002070  | -0.000000044 |
| 46 | 6 | -0.000000508 | 0.000001848  | 0.000000356  |
| 47 | 1 | -0.000000401 | 0.000001387  | 0.000001226  |
| 48 | 1 | 0.000001386  | -0.000000018 | 0.000002486  |
| 49 | 1 | -0.000000027 | 0.000001706  | 0.000001033  |
| 50 | 1 | -0.000001140 | 0.000002579  | 0.000000244  |
| 51 | 1 | 0.000001016  | 0.000000241  | 0.000002402  |
| 52 | 1 | 0.000000769  | 0.000000119  | 0.000001825  |
| 53 | 6 | 0.000000225  | 0.000002433  | 0.000001416  |
| 54 | 1 | -0.000000489 | 0.000002061  | 0.000001176  |
| 55 | 1 | -0.000000251 | 0.000002373  | 0.000001399  |
| 56 | 6 | -0.000000558 | 0.000002231  | -0.000000504 |
| 57 | 1 | -0.000001017 | 0.000002899  | 0.000000493  |
| 58 | 1 | -0.000000981 | 0.000002515  | 0.000000685  |
| 59 | 6 | 0.000000310  | 0.000000493  | 0.000001899  |
| 60 | 1 | 0.000000890  | 0.000000366  | 0.000002125  |
| 61 | 1 | 0.000000759  | 0.000000962  | 0.000002406  |
| 62 | 6 | 0.000001343  | 0.000000193  | 0.000002910  |
| 63 | 1 | 0.000001106  | -0.000000359 | 0.000002001  |
| 64 | 1 | 0.000001591  | -0.000000001 | 0.000002894  |
| 65 | 1 | -0.000000453 | -0.000000069 | -0.000000979 |
| 66 | 6 | -0.000000626 | -0.000001797 | -0.000001380 |
| 67 | 6 | 0.000000160  | -0.000000873 | -0.000000734 |
| 68 | 6 | -0.000001408 | 0.000000626  | -0.000002570 |
| 69 | 6 | -0.000000349 | -0.000000144 | -0.000001051 |
| 70 | 6 | -0.000001325 | 0.000001004  | -0.000002092 |
| 71 | 6 | 0.000000797  | -0.000000789 | 0.000000213  |
| 72 | 1 | -0.000001188 | 0.000000693  | -0.000001930 |
| 73 | 1 | -0.000000738 | 0.000000021  | -0.000001466 |



|    |   |              |              |              |
|----|---|--------------|--------------|--------------|
| 74 | 1 | -0.000000582 | 0.000000496  | -0.000001646 |
| 75 | 6 | -0.000001817 | -0.000002503 | 0.000000293  |
| 76 | 6 | 0.000002795  | -0.000000572 | -0.000002464 |
| 77 | 1 | 0.000000614  | -0.000003337 | 0.000000465  |
| 78 | 6 | 0.000000016  | -0.000001755 | 0.000002351  |
| 79 | 7 | -0.000000097 | 0.000000091  | -0.000002719 |
| 80 | 8 | 0.000000884  | -0.000003724 | -0.000006798 |
| 81 | 6 | 0.000003688  | -0.000004389 | -0.000001764 |
| 82 | 1 | -0.000000162 | -0.000000791 | 0.000000047  |
| 83 | 1 | -0.000000201 | -0.000000904 | -0.000001274 |
| 84 | 1 | -0.000000661 | 0.000000439  | -0.000000082 |
| 85 | 8 | 0.000002845  | 0.000000150  | 0.000002455  |
| 86 | 1 | -0.000004465 | -0.000001137 | 0.000001771  |
| 87 | 1 | -0.000002666 | -0.000000233 | -0.000001057 |

---

### ***Re*-form of the 1:1 complex of **2f** with 4-methyl quinolinone**

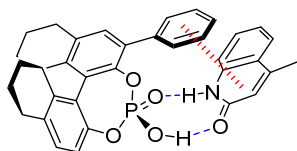

*Re*-form of complex of **2f**  
with 4-methyl quinolinone

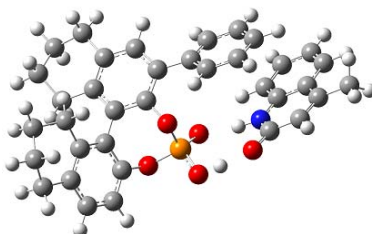

RB3LYP/6-31G(d)

empirical dispersion=gd3

Number of Imaginary Frequencies = 0

Zero-point correction = 0.630050 a.u.

Thermal correction to Energy = 0.665591 a.u.

Thermal correction to Enthalpy = 0.666535 a.u.

Thermal correction to Gibbs Free Energy = 0.562168 a.u.

Sum of electronic and zero-point Energies = -2164.185543 a.u.

Sum of electronic and thermal Energies = -2164.150002 a.u.

Sum of electronic and thermal Enthalpies = -2164.149058 a.u.

Sum of electronic and thermal Free Energies = -2164.253425 a.u.

BSSE energy = 0.010759701044 a.u.

---

| Center | Atomic | Forces (Hartrees/Bohr) |              |              |
|--------|--------|------------------------|--------------|--------------|
| Number | Number | X                      | Y            | Z            |
| 1      | 8      | -0.000010391           | -0.000000469 | 0.000010472  |
| 2      | 1      | 0.000011497            | 0.000003504  | -0.000010426 |
| 3      | 1      | -0.000000446           | -0.000001602 | 0.000005387  |
| 4      | 6      | -0.000000875           | -0.000006566 | -0.000003215 |
| 5      | 1      | 0.000002567            | 0.000000261  | -0.000003278 |
| 6      | 6      | -0.000010230           | 0.000005958  | -0.000001630 |
| 7      | 6      | -0.000006016           | 0.000005876  | -0.000001411 |
| 8      | 6      | 0.000009330            | 0.000007079  | -0.000000056 |
| 9      | 6      | 0.000004990            | 0.000011859  | -0.000000608 |
| 10     | 6      | -0.000004255           | -0.000017594 | -0.000000696 |
| 11     | 6      | -0.000008644           | 0.000000846  | 0.000012452  |
| 12     | 6      | 0.000002170            | -0.000000368 | 0.000000086  |
| 13     | 6      | -0.000000441           | -0.000004324 | 0.000003657  |
| 14     | 6      | 0.000000284            | -0.000005988 | 0.000000675  |
| 15     | 6      | -0.000000513           | -0.000005681 | 0.000000759  |
| 16     | 6      | 0.000000083            | 0.000001634  | 0.000006337  |
| 17     | 1      | -0.000000148           | -0.000001209 | 0.000006588  |
| 18     | 8      | 0.000006092            | -0.000006121 | 0.000003886  |
| 19     | 8      | 0.000014157            | 0.000004108  | 0.000000289  |
| 20     | 15     | -0.000003861           | -0.000007776 | 0.000012249  |
| 21     | 8      | -0.000005380           | 0.000004826  | -0.000012109 |
| 22     | 6      | 0.000003778            | -0.000009470 | 0.000002661  |
| 23     | 6      | -0.000001379           | 0.000001440  | 0.000001111  |
| 24     | 6      | 0.000002678            | 0.000003010  | -0.000007554 |
| 25     | 6      | -0.000005069           | 0.000007459  | -0.000004344 |
| 26     | 6      | 0.000005329            | 0.000004138  | 0.000001102  |
| 27     | 6      | -0.000004738           | 0.000003499  | -0.000003097 |
| 28     | 1      | -0.000003157           | 0.000000836  | -0.000002646 |
| 29     | 1      | -0.000002222           | 0.000001619  | -0.000001088 |
| 30     | 1      | 0.000000648            | 0.000003744  | -0.000001046 |

---

|    |   |              |              |              |
|----|---|--------------|--------------|--------------|
| 31 | 1 | -0.000001001 | 0.000001707  | -0.000003074 |
| 32 | 1 | -0.000001280 | 0.000003457  | -0.000002652 |
| 33 | 6 | -0.000001542 | -0.000000938 | 0.000007369  |
| 34 | 6 | 0.000000876  | 0.000002825  | 0.000002863  |
| 35 | 1 | 0.000002033  | 0.000002836  | 0.000000155  |
| 36 | 6 | -0.000000604 | -0.000002333 | -0.000002352 |
| 37 | 1 | -0.000000674 | -0.000000479 | -0.000002863 |
| 38 | 6 | -0.000000117 | 0.000001609  | 0.000002162  |
| 39 | 1 | -0.000000277 | -0.000001515 | 0.000001553  |
| 40 | 1 | 0.000000967  | -0.000000892 | 0.000006649  |
| 41 | 1 | -0.000001171 | -0.000002487 | -0.000000814 |
| 42 | 1 | -0.000000943 | 0.000000376  | -0.000002241 |
| 43 | 1 | 0.000000892  | -0.000001136 | 0.000005888  |
| 44 | 1 | 0.000001486  | 0.000000809  | 0.000002620  |
| 45 | 6 | -0.000000252 | -0.000001830 | -0.000000653 |
| 46 | 1 | 0.000000210  | -0.000000319 | -0.000000982 |
| 47 | 1 | -0.000001112 | -0.000002729 | -0.000000653 |
| 48 | 6 | -0.000001033 | -0.000001767 | -0.000003516 |
| 49 | 1 | -0.000001749 | -0.000001011 | -0.000002715 |
| 50 | 1 | -0.000001822 | -0.000002825 | -0.000001824 |
| 51 | 6 | 0.000000553  | 0.000000360  | 0.000002401  |
| 52 | 1 | 0.000000855  | 0.000002574  | 0.000003266  |
| 53 | 1 | 0.000001077  | -0.000000091 | 0.000004025  |
| 54 | 6 | 0.000001923  | 0.000001991  | 0.000003116  |
| 55 | 1 | 0.000002121  | 0.000001282  | 0.000005068  |
| 56 | 1 | 0.000001234  | 0.000000570  | 0.000005802  |
| 57 | 1 | 0.000000290  | -0.000000354 | 0.000000695  |
| 58 | 6 | 0.000003764  | 0.000009548  | -0.000010363 |
| 59 | 6 | 0.000003136  | 0.000012711  | -0.000010896 |
| 60 | 6 | 0.000003943  | -0.000009265 | -0.000001487 |
| 61 | 6 | 0.000006613  | -0.000007358 | 0.000006205  |
| 62 | 6 | -0.000012546 | -0.000011008 | -0.000008075 |
| 63 | 6 | -0.000002901 | -0.000023628 | 0.000000522  |
| 64 | 1 | -0.000001452 | -0.000000102 | -0.000006678 |
| 65 | 1 | -0.000001161 | -0.000001638 | -0.000004812 |
| 66 | 1 | -0.000001445 | -0.000002041 | -0.000001355 |

|    |   |              |              |              |
|----|---|--------------|--------------|--------------|
| 67 | 6 | -0.000000826 | 0.000007514  | -0.000013631 |
| 68 | 6 | -0.000013333 | 0.000004024  | 0.000007136  |
| 69 | 1 | 0.000001435  | 0.000003285  | -0.000001672 |
| 70 | 6 | 0.000011793  | 0.000007069  | -0.000003718 |
| 71 | 7 | 0.000005680  | 0.000008147  | 0.000010171  |
| 72 | 8 | -0.000004655 | -0.000005613 | 0.000001510  |
| 73 | 6 | 0.000020648  | -0.000007021 | -0.000017397 |
| 74 | 1 | 0.000002069  | 0.000008554  | 0.000001727  |
| 75 | 1 | -0.000001630 | 0.000006415  | 0.000002147  |
| 76 | 1 | -0.000008606 | -0.000007233 | 0.000000868  |
| 77 | 1 | -0.000007301 | 0.000003426  | 0.000006001  |

---

### *S<sub>i</sub>*-form of the 1:1 complex of **2f** with 4-methyl quinolinone

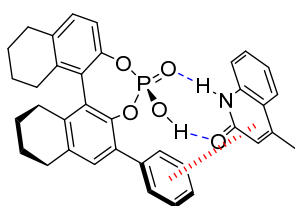

*S<sub>i</sub>*-form of complex of **2f**  
with 4-methyl quinolinone

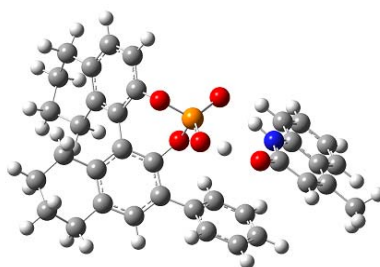

RB3LYP/6-31G(d)

empirical dispersion=gd3

Number of Imaginary Frequencies = 0

Zero-point correction = 0.629980 a.u.

Thermal correction to Energy = 0.665543 a.u.

Thermal correction to Enthalpy = 0.666488 a.u.

Thermal correction to Gibbs Free Energy = 0.561471 a.u.

Sum of electronic and zero-point Energies = -2164.183974 a.u.

Sum of electronic and thermal Energies = -2164.148410 a.u.

Sum of electronic and thermal Enthalpies = -2164.147466 a.u.

Sum of electronic and thermal Free Energies = -2164.252483 a.u.

BSSSE energy = 0.009609387408 a.u.

| Center<br>Number | Atomic<br>Number | Forces (Hartrees/Bohr) |              |              |
|------------------|------------------|------------------------|--------------|--------------|
|                  |                  | X                      | Y            | Z            |
| 1                | 6                | 0.000002225            | -0.000003021 | 0.000003068  |
| 2                | 1                | -0.000001273           | -0.000000696 | 0.000003877  |
| 3                | 6                | -0.000004524           | 0.000000301  | 0.000003488  |
| 4                | 6                | -0.000001377           | 0.000000419  | 0.000000100  |
| 5                | 6                | 0.000000715            | 0.000002716  | -0.000001528 |
| 6                | 6                | -0.000001920           | 0.000003135  | -0.000002191 |
| 7                | 6                | 0.000003697            | -0.000006134 | 0.000001360  |
| 8                | 6                | 0.000013917            | 0.000005871  | -0.000002786 |
| 9                | 6                | -0.000008652           | -0.000001966 | 0.000002108  |
| 10               | 6                | -0.000002715           | -0.000002765 | 0.000005913  |
| 11               | 6                | 0.000003852            | 0.000005371  | -0.000001960 |
| 12               | 6                | -0.000001476           | 0.000003010  | -0.000002066 |
| 13               | 6                | 0.000008452            | -0.000001816 | 0.000001635  |
| 14               | 1                | 0.000004120            | -0.000001449 | -0.000004244 |
| 15               | 8                | -0.000006831           | -0.000003446 | 0.000004842  |
| 16               | 8                | 0.000006842            | -0.000004427 | 0.000002440  |
| 17               | 15               | 0.000006974            | -0.000005540 | 0.000010675  |
| 18               | 8                | -0.000000928           | 0.000002754  | 0.000002831  |
| 19               | 6                | 0.000000667            | 0.000000969  | 0.000002969  |
| 20               | 6                | 0.000000803            | 0.000005439  | -0.000001501 |
| 21               | 6                | -0.000009722           | -0.000009628 | -0.000007456 |
| 22               | 6                | 0.000001784            | 0.000002657  | -0.000006307 |
| 23               | 6                | 0.000002545            | -0.000001846 | 0.000001181  |
| 24               | 6                | 0.000005701            | 0.000002247  | -0.000001873 |
| 25               | 1                | -0.000004830           | 0.000007793  | -0.000003704 |
| 26               | 1                | 0.000000444            | 0.000001762  | -0.000001314 |
| 27               | 1                | 0.000000707            | 0.000002737  | -0.000004074 |
| 28               | 1                | -0.000000103           | -0.000001387 | -0.000001566 |
| 29               | 1                | 0.000000601            | 0.000000777  | -0.000002022 |
| 30               | 6                | -0.000003474           | -0.000002796 | -0.000004258 |
| 31               | 6                | -0.000001122           | -0.000002324 | 0.000004299  |
| 32               | 1                | 0.000001060            | -0.000000368 | -0.000000056 |

|    |   |              |              |              |
|----|---|--------------|--------------|--------------|
| 33 | 6 | -0.000000333 | -0.000003165 | 0.000004014  |
| 34 | 1 | -0.000002140 | -0.000002091 | 0.000002005  |
| 35 | 6 | -0.000003716 | -0.000001737 | 0.000002453  |
| 36 | 1 | -0.000000765 | -0.000002172 | -0.000000481 |
| 37 | 1 | 0.000001987  | -0.000000595 | -0.000002593 |
| 38 | 1 | -0.000000034 | -0.000002414 | 0.000000876  |
| 39 | 1 | -0.000002156 | -0.000002520 | 0.000002372  |
| 40 | 1 | 0.000002369  | -0.000001521 | -0.000000075 |
| 41 | 1 | 0.000000654  | -0.000002120 | -0.000001687 |
| 42 | 6 | 0.000001072  | -0.000002676 | -0.000000736 |
| 43 | 1 | 0.000000355  | -0.000001883 | 0.000002871  |
| 44 | 1 | -0.000000190 | -0.000004094 | 0.000001495  |
| 45 | 6 | -0.000001916 | -0.000001880 | 0.000003240  |
| 46 | 1 | -0.000001078 | -0.000003195 | 0.000002587  |
| 47 | 1 | -0.000000659 | -0.000002662 | 0.000002215  |
| 48 | 6 | -0.000000485 | -0.000001537 | -0.000001023 |
| 49 | 1 | 0.000000804  | -0.000001242 | 0.000000412  |
| 50 | 1 | 0.000000589  | -0.000002282 | -0.000000111 |
| 51 | 6 | 0.000003581  | 0.000000073  | 0.000000149  |
| 52 | 1 | 0.000000354  | -0.000000851 | -0.000001073 |
| 53 | 1 | 0.000002231  | -0.000002873 | -0.000001397 |
| 54 | 1 | 0.000000216  | 0.000002841  | -0.000005403 |
| 55 | 6 | -0.000002402 | -0.000005629 | 0.000006299  |
| 56 | 6 | -0.000001736 | -0.000005832 | -0.000002225 |
| 57 | 6 | 0.000010765  | 0.000004293  | 0.000006823  |
| 58 | 6 | -0.000001947 | 0.000006431  | -0.000004625 |
| 59 | 6 | 0.000003603  | 0.000004779  | 0.000001729  |
| 60 | 6 | -0.000003419 | -0.000006721 | 0.000002927  |
| 61 | 1 | -0.000001427 | -0.000000257 | 0.000002154  |
| 62 | 1 | -0.000002338 | -0.000001318 | 0.000001304  |
| 63 | 1 | -0.000000917 | 0.000001155  | 0.000002252  |
| 64 | 6 | 0.000001693  | -0.000004919 | -0.000002726 |
| 65 | 6 | 0.000016885  | -0.000004073 | -0.000006496 |
| 66 | 1 | 0.000000575  | 0.000001273  | -0.000001570 |
| 67 | 6 | 0.000007116  | 0.000011721  | -0.000028025 |
| 68 | 7 | 0.000000161  | 0.000008640  | 0.000013636  |

|    |   |              |              |              |
|----|---|--------------|--------------|--------------|
| 69 | 8 | -0.000031505 | 0.000000073  | 0.000035380  |
| 70 | 6 | -0.000023186 | -0.000013515 | 0.000004770  |
| 71 | 1 | 0.000004594  | 0.000007256  | -0.000002731 |
| 72 | 1 | -0.000006320 | 0.000005505  | -0.000003833 |
| 73 | 1 | -0.000010162 | 0.000002956  | -0.000018602 |
| 74 | 8 | -0.000024426 | 0.000006200  | -0.000030682 |
| 75 | 1 | 0.000038494  | 0.000000920  | 0.000011648  |
| 76 | 1 | -0.000001609 | 0.000001039  | 0.000002102  |
| 77 | 1 | 0.000010606  | 0.000022268  | -0.000001496 |

---

## References

1. A. Uenishi, Y. Nakagawa, H. Osumi and T. Harada, *Chem. Eur. J.*, 2013, **19**, 4896–4905.
2. G. Pousse, A. Devineau, V. Dalla, L. Humphreys, M.-C. Lasne, J. Rouden and J. Blanchet, *Tetrahedron*, 2009, **65**, 10617–10622.
3. (a) C. Müller, A. Bauer, M. M. Maturi, M. C. Cuquerella, M. A. Miranda and T. Bach, *J. Am. Chem. Soc.*, 2011, **133**, 16689–16697; (b) R. Alonso and T. Bach, *Angew. Chem. Int. Ed.*, 2014, **53**, 4368–4371; (c) M. Heitbaum, R. Fröhlich and F. Glorius, *Adv. Synth. Catal.*, 2010, **352**, 357–362.
4. K. K. Park and J. J. Lee, *Tetrahedron*, 2004, **60**, 2993–2999.
5. Gaussian 09: M. J. Frisch, G. W. Trucks, H. B. Schlegel, G. E. Scuseria, M. A. Robb, J. R. Cheeseman, G. Scalmani, V. Barone, B. Mennucci, G. A. Petersson, H. Nakatsuji, M. Caricato, X. Li, H. P. Hratchian, A. F. Izmaylov, J. Bloino, G. Zheng, J. L. Sonnenberg, M. Hada, M. Ehara, K. Toyota, R. Fukuda, J. Hasegawa, M. Ishida, T. Nakajima, Y. Honda, O. Kitao, H. Nakai, T. Vreven, J. A. Montgomery, Jr., J. E. Peralta, E. Ogliaro, M. Bearpark, J. J. Heyd, E. Brothers, K. N. Kudin, V. N. Staroverov, R. Kobayashi, J. Normand, K. Raghavachari, A. Rendell, J. C. Burant, S. S. Iyengar, J. Tomasi, M. Cossi, N. Rega, M. J. Millam, M. Klene, J. E. Knox, J. B. Cross, V. Bakken, C. Adamo, J. Jaramillo, R. Gomperts, R. E. Stratmann, O. Yazyev, A. J. Austin, R. Cammi, C. Pomelli, J. W. Ochterski, R. L. Martin, K. Morokuma, V. G. Zakrzewski, G. A. Voth, P. Salvador, J. J. Dannenberg, S. Dapprich, A. D. Daniels, Ö,

- Farkas, J. B. Foresman, J. V. Ortiz, J. Cioslowski and D. J. Fox,  
Gaussian, Inc., Wallingford CT, 2009.
6. (a) H. B. Jansen, P. Ros, *Chem. Phys. Lett.*, 1969, **3**, 140-143; (b) B. Liu, A. D. McLean, *J. Chem. Phys.*, 1973, **59**, 4557-4558.
  7. S. F. Boys, F. Bernardi, *Mol. Phys.*, 1970, **19**, 553-566.
  8. The stability order was not influenced by the corrections.



## HPLC traces

*rac*-**4a** : Chiralpak IC, hexane:EtOH=20:1, 1.5 ml/min, 254 nm

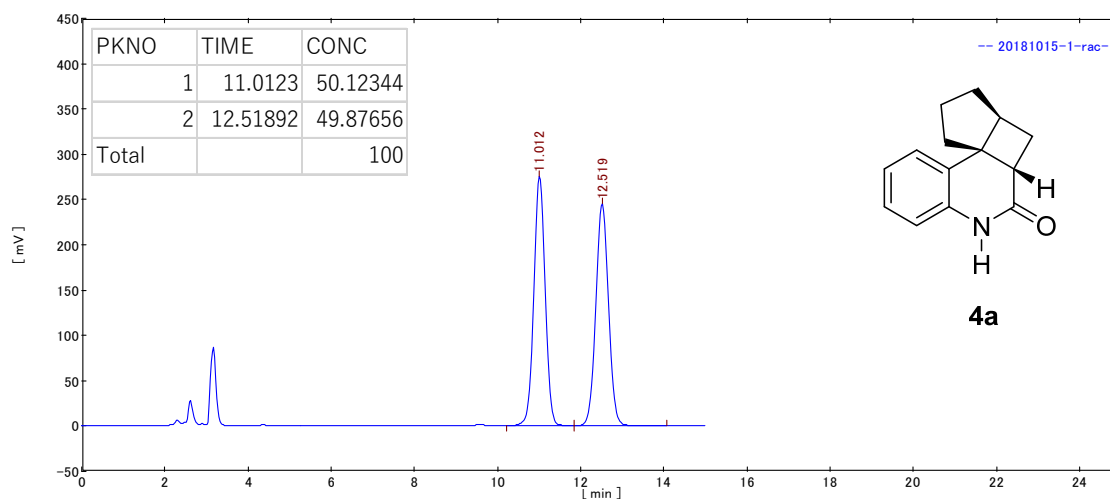

**4a**: 90% ee

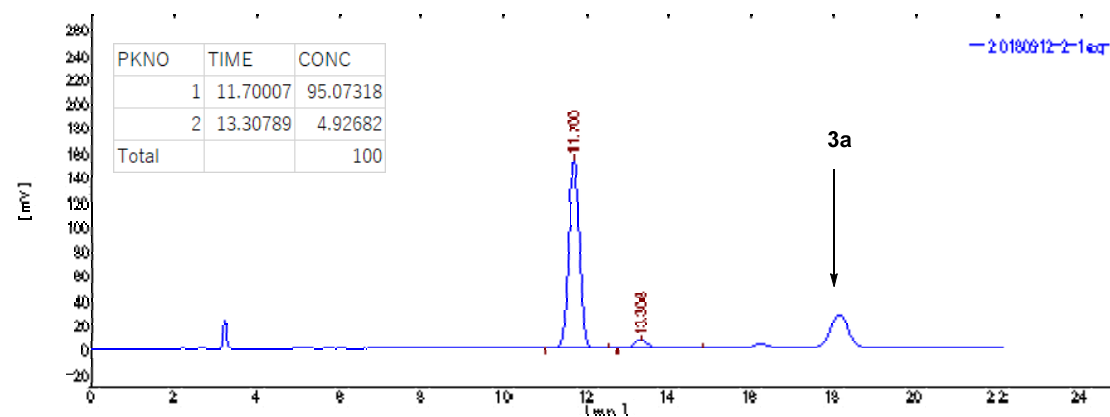

*rac*-**4b** : Chiralpak IC, hexane:EtOH=20:1, 1.5 ml/min, 254 nm

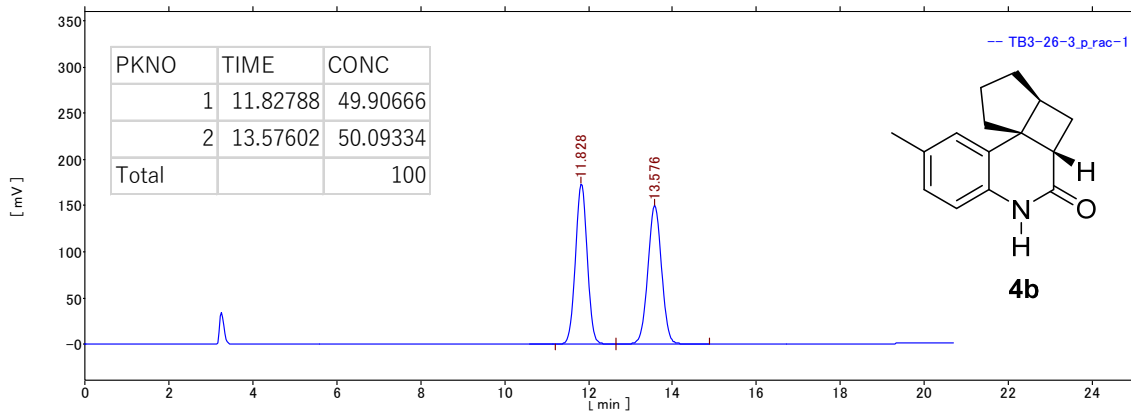

**4b**: 90% ee

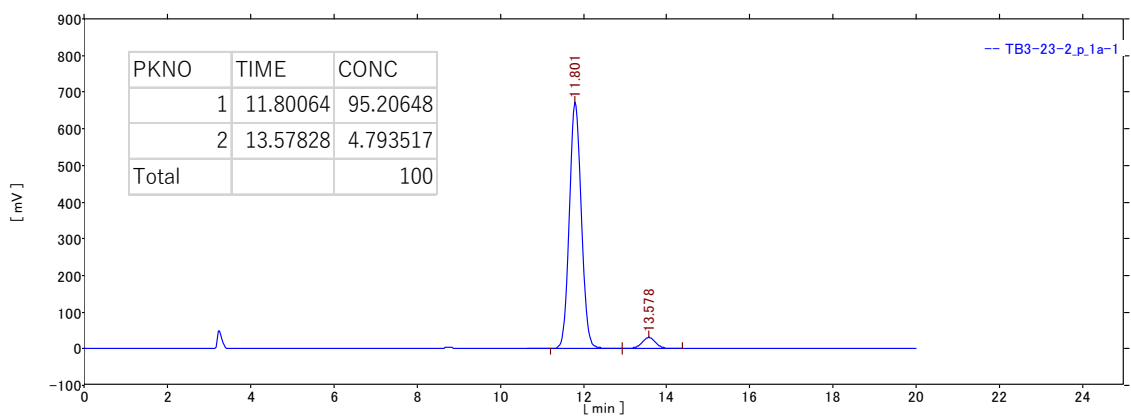

*rac*-**4c** : Chiralpak IC, hexane:EtOH=20:1, 1.5 ml/min, 254 nm

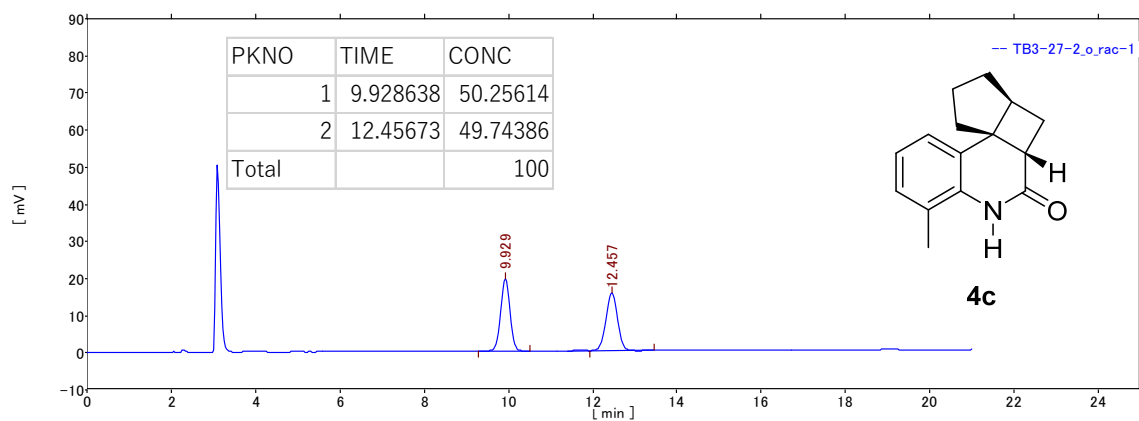

**4c**: 92% ee

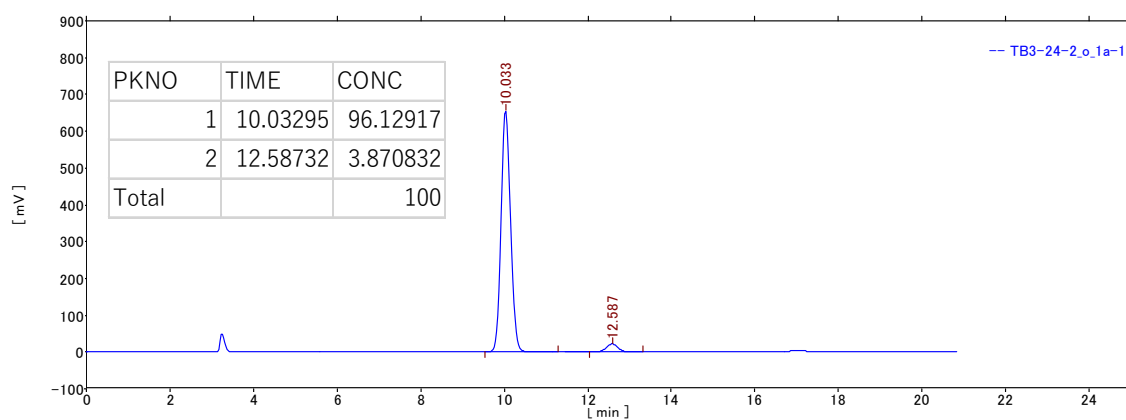

*rac*-**4d** : Chiralpak IC, hexane:EtOH=20:1, 1.5 ml/min, 254 nm

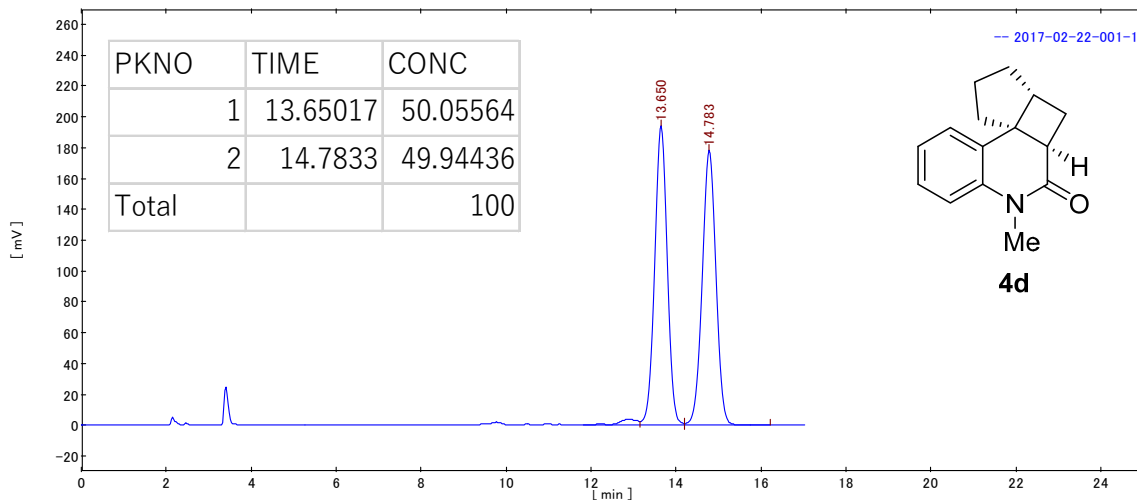

**4d**: 4% ee

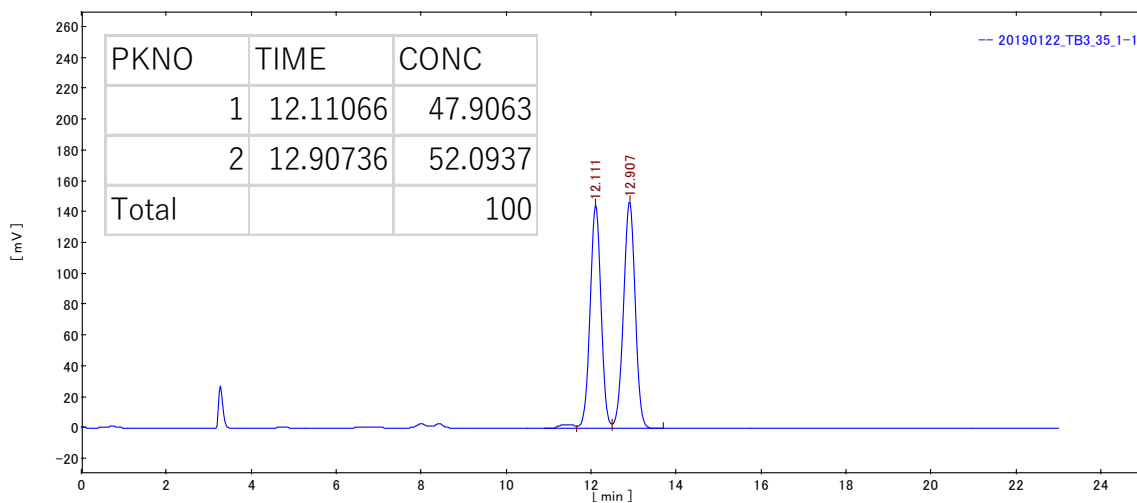

*rac*-**4e**: Chiralpak IC, hexane:EtOH=20:1, 1.5 ml/min, 254 nm

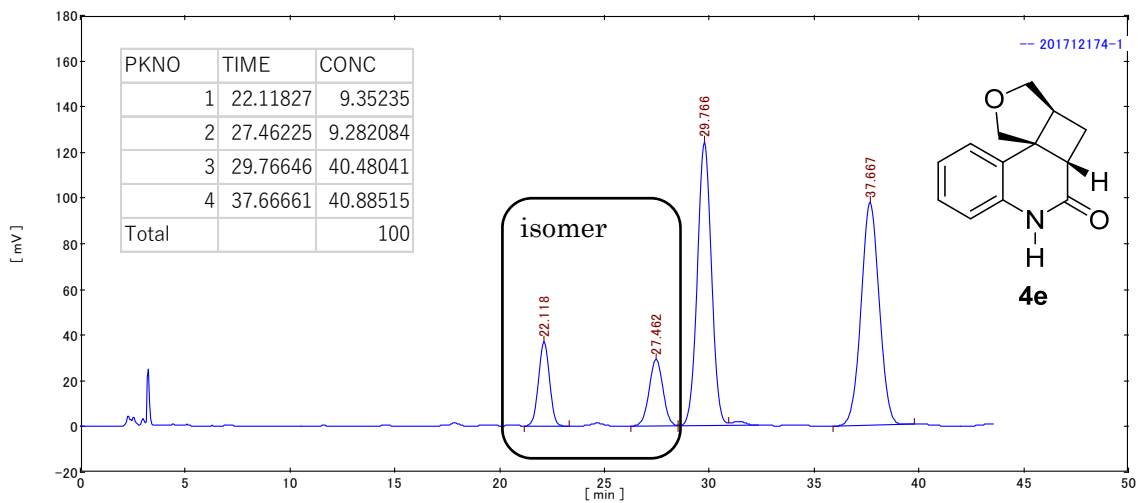

**4e**: 69% ee

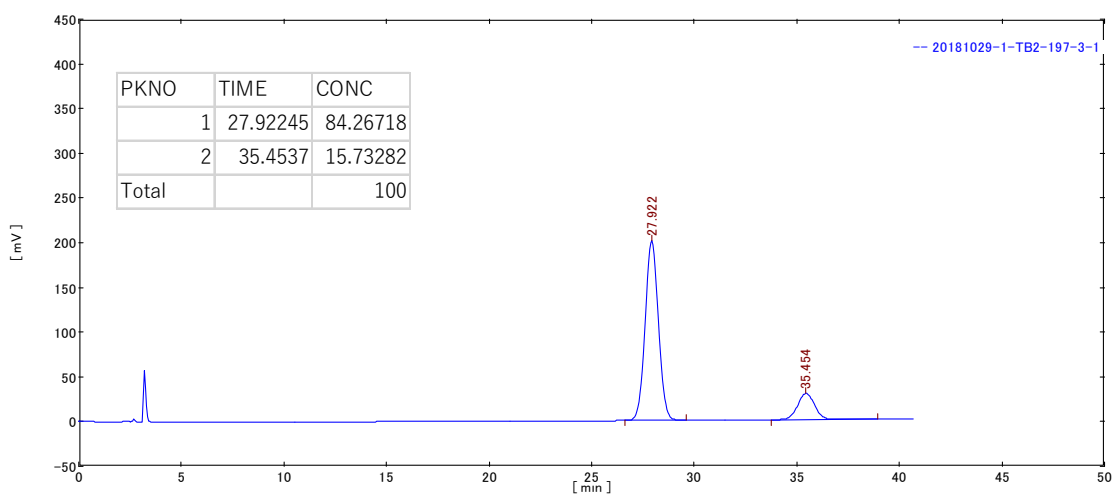

*rac*-**4f**: Chiralpak IC, hexane:EtOH=20:1, 1.5 ml/min, 254 nm

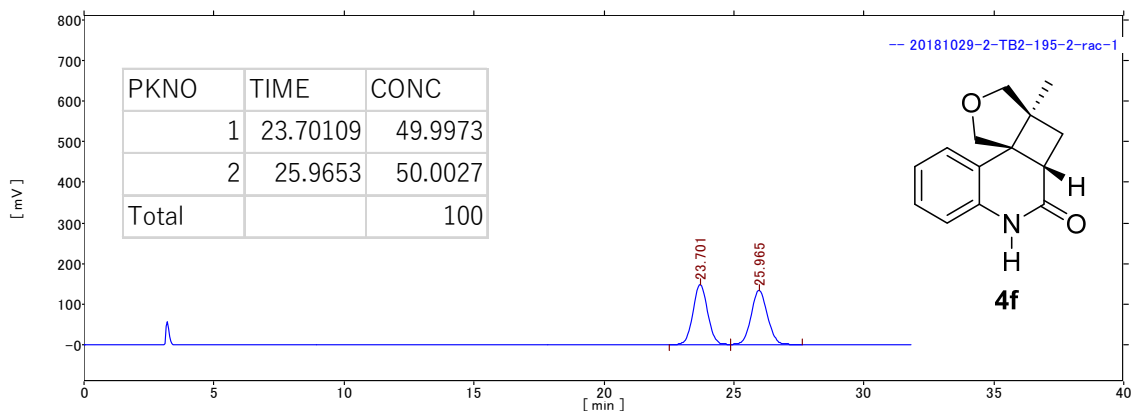

**4f**: 70% ee

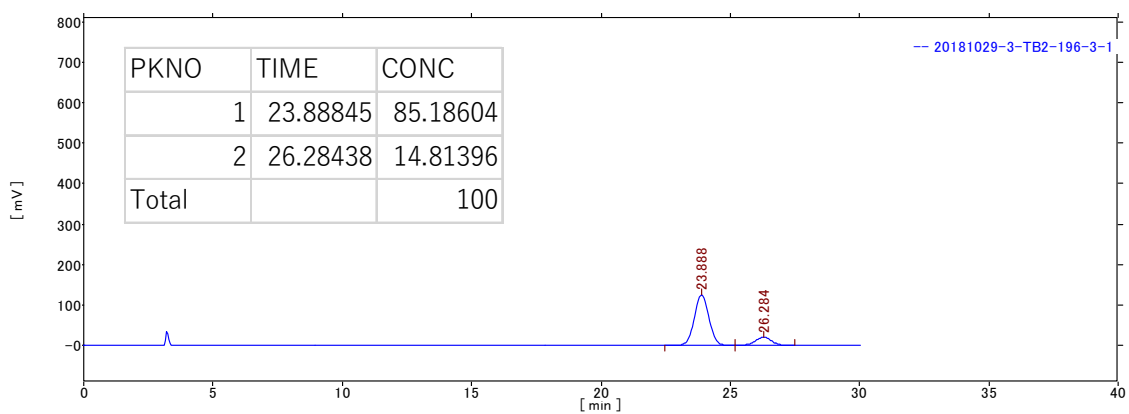

*rac*-**4g**: Chiralpak IC, hexane:EtOH=20:1, 1.5 ml/min, 254 nm

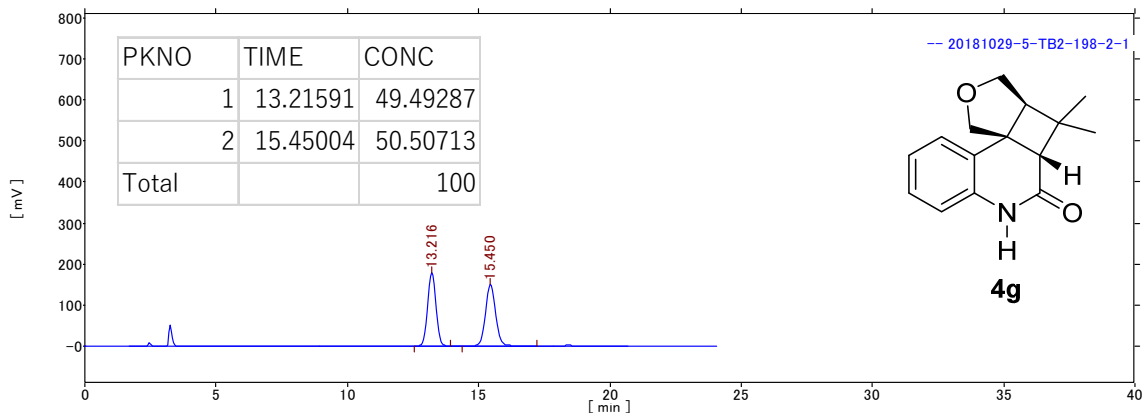

**4g**: 64% ee

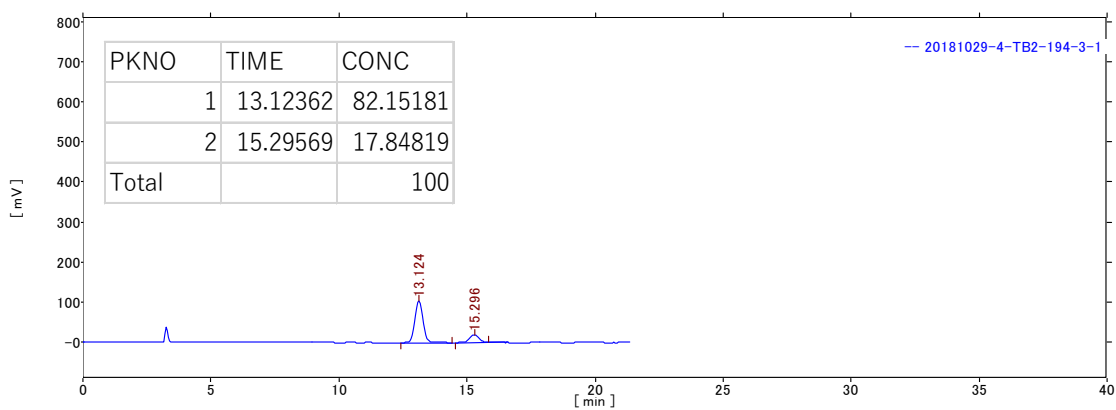

## NMR Spectra of New Compounds



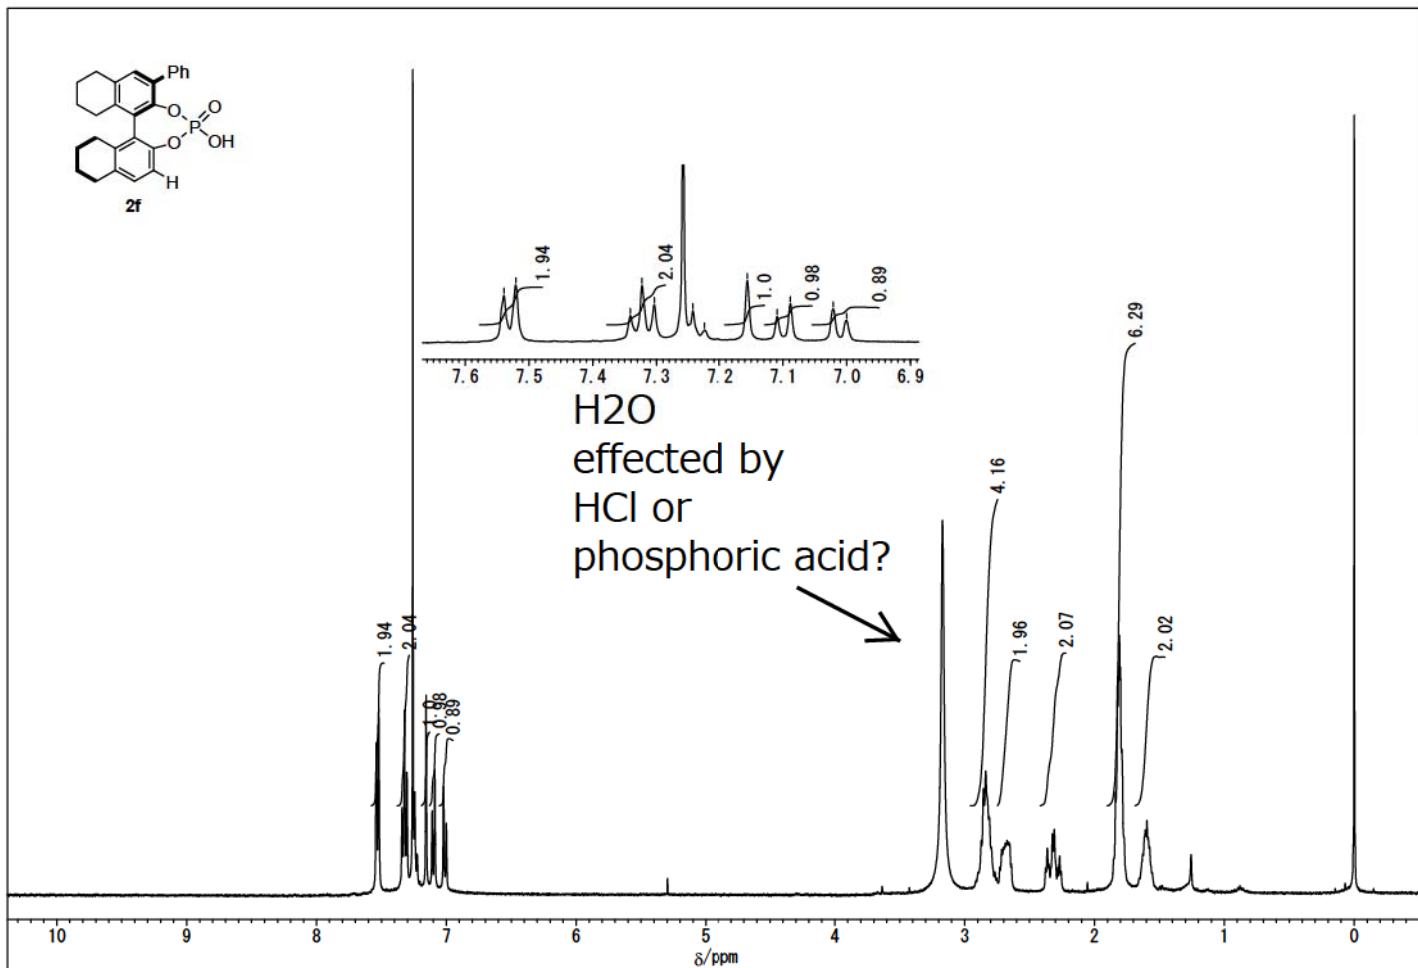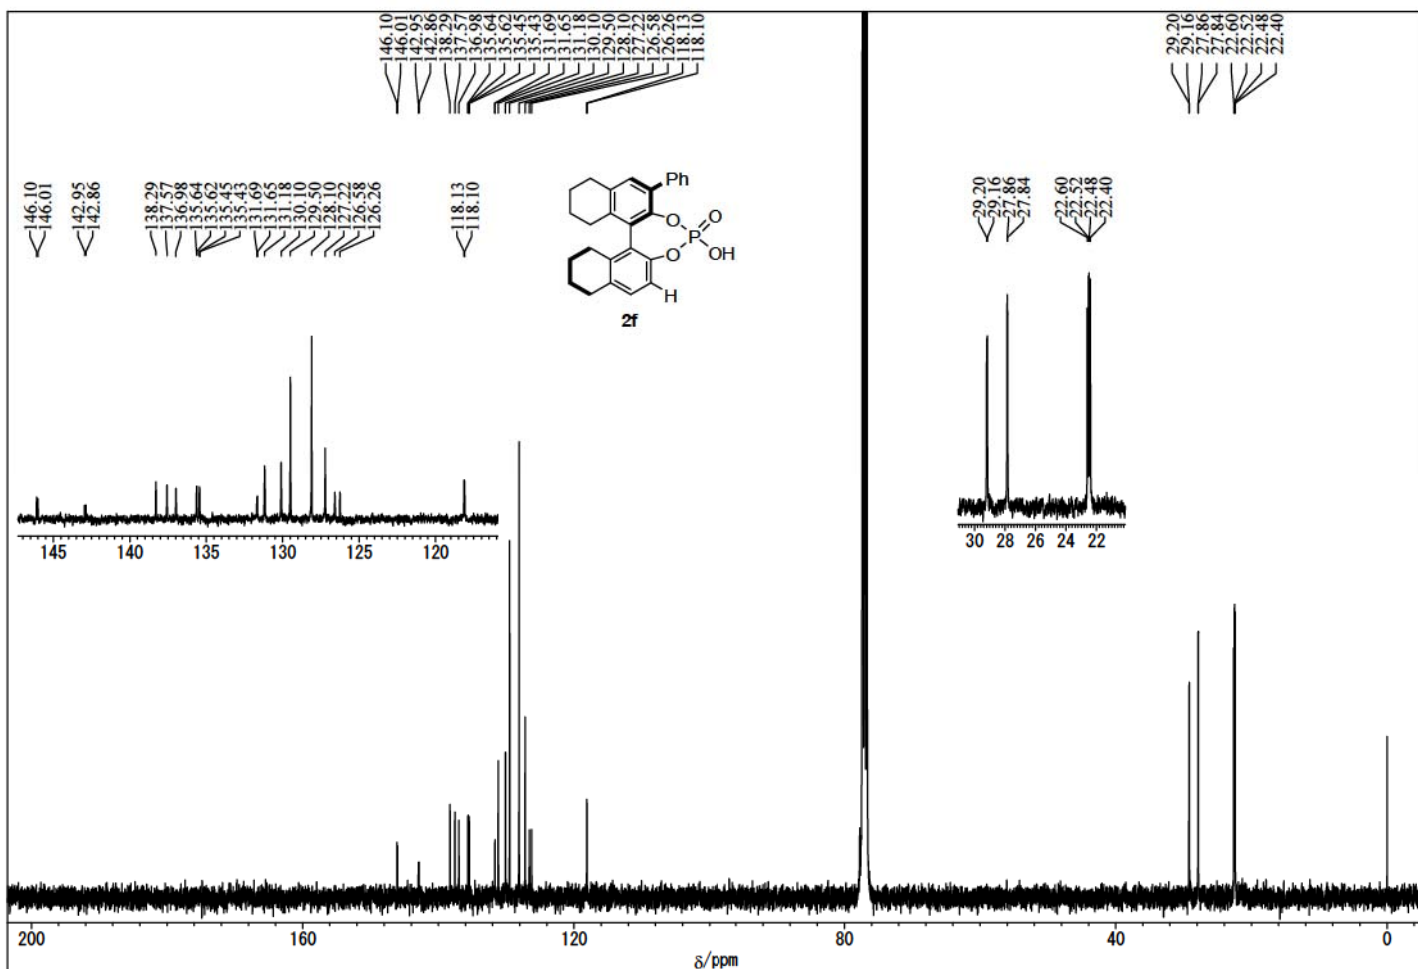

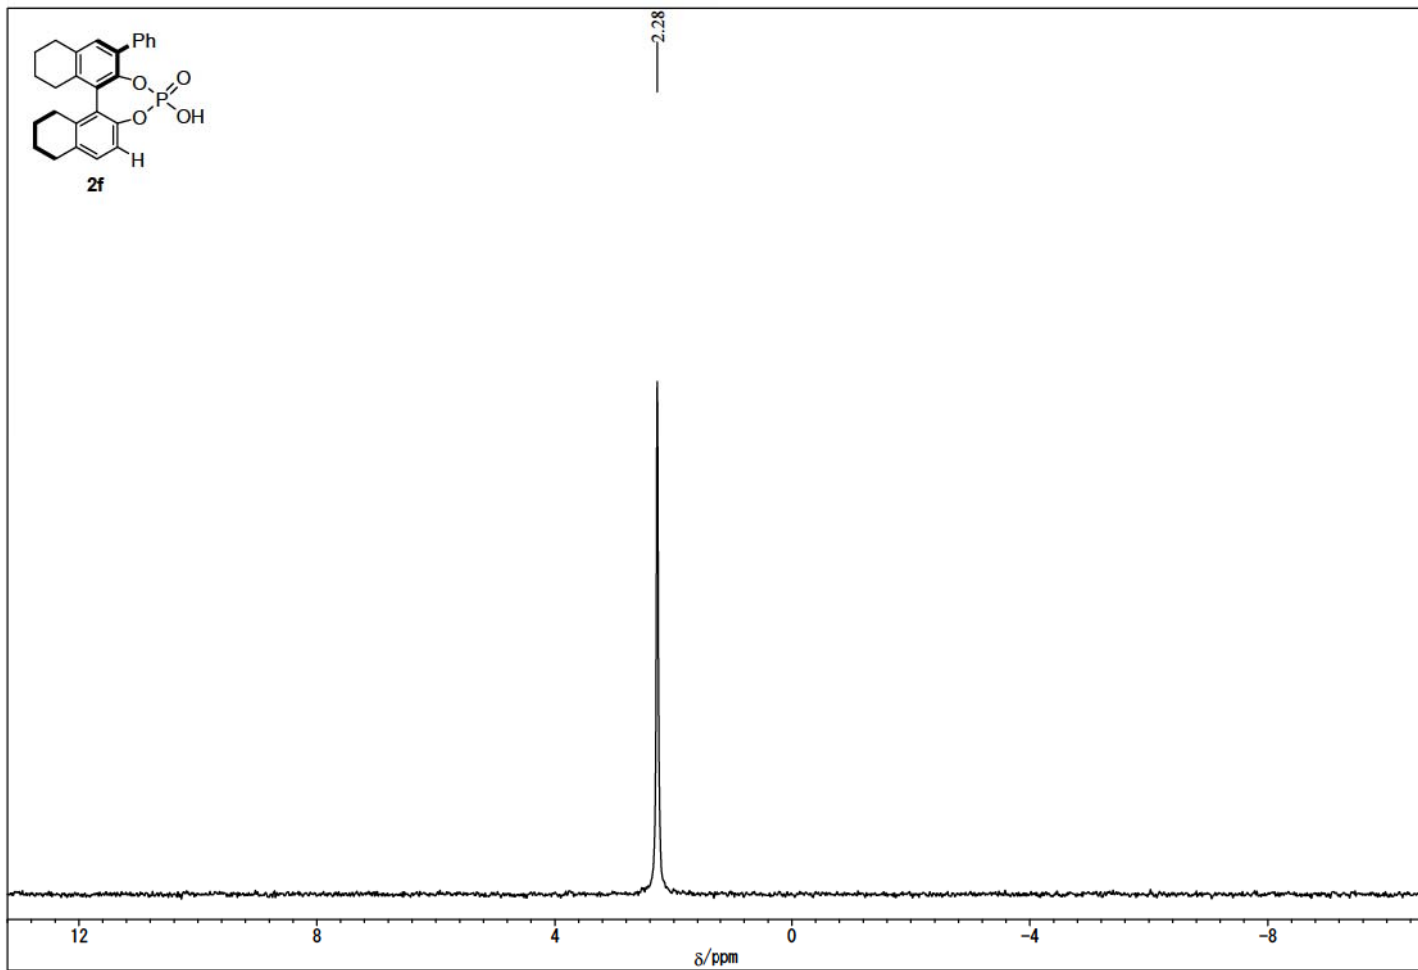

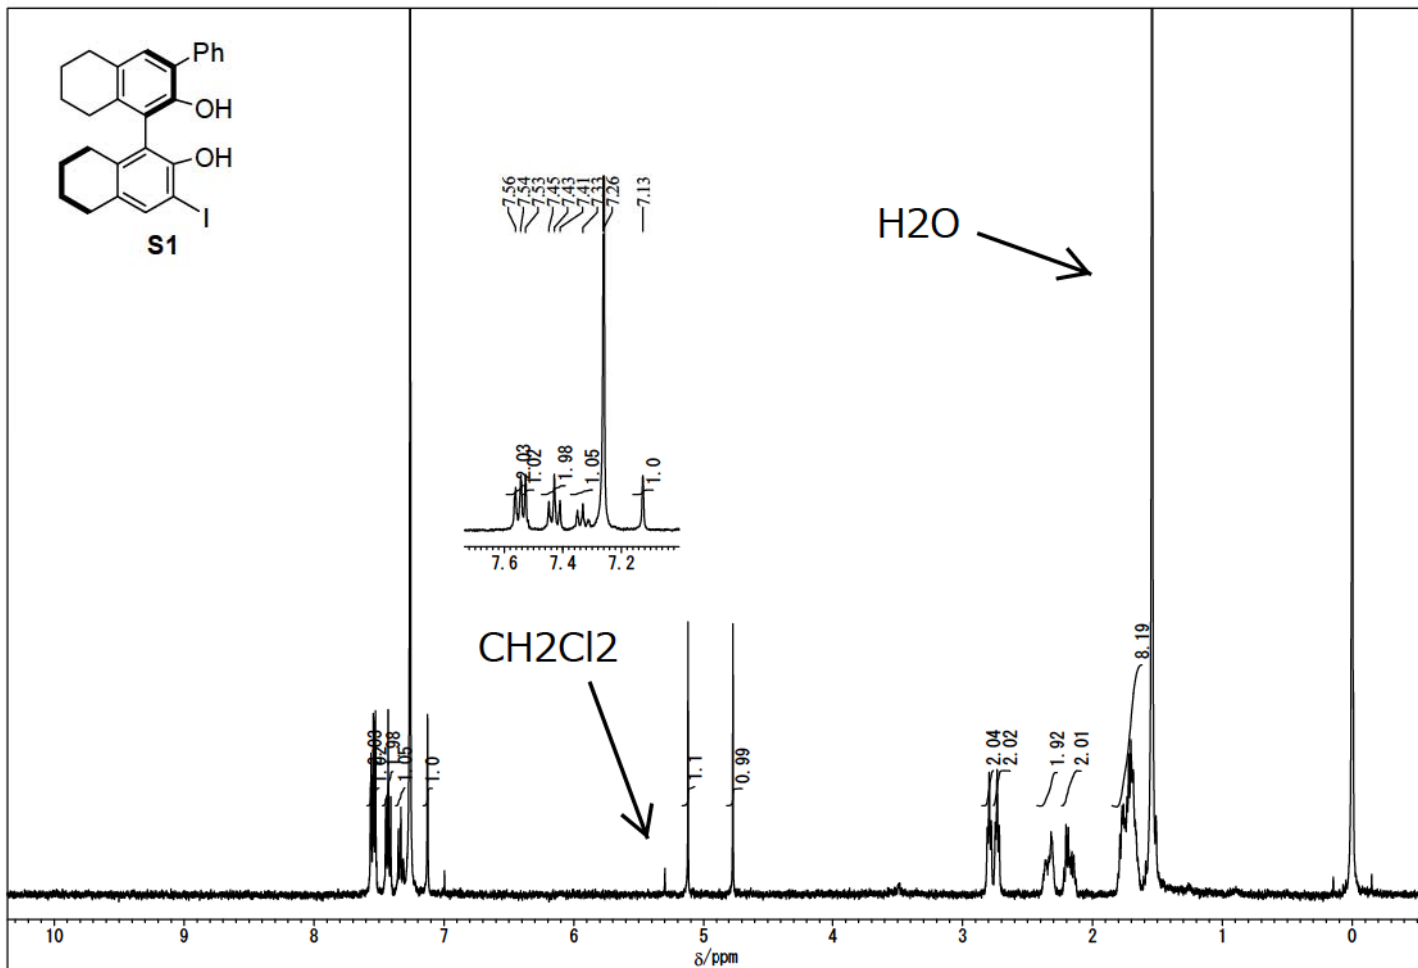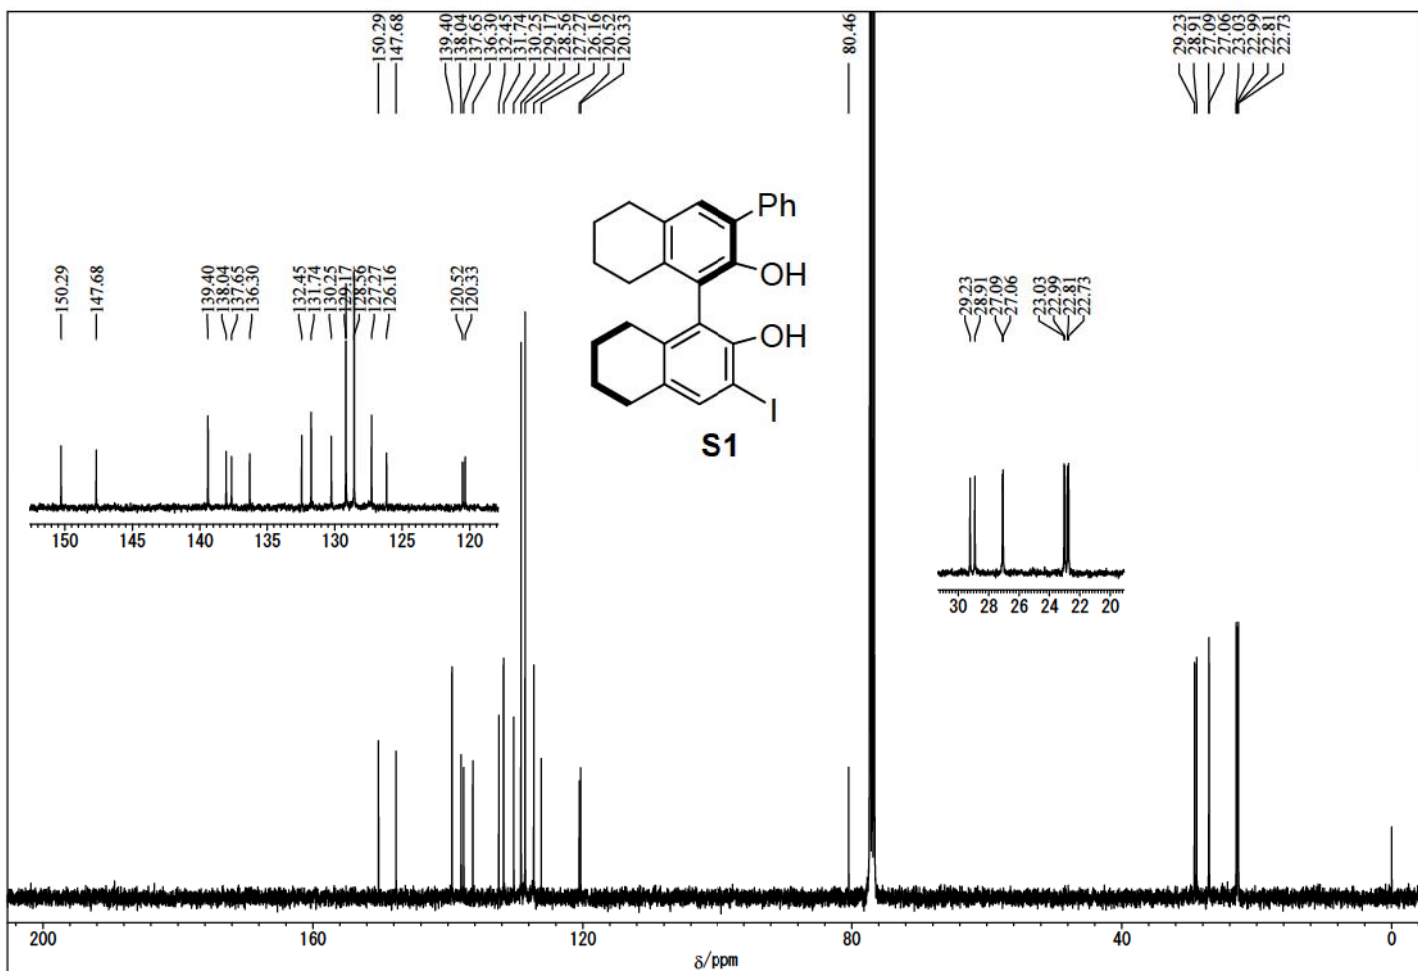

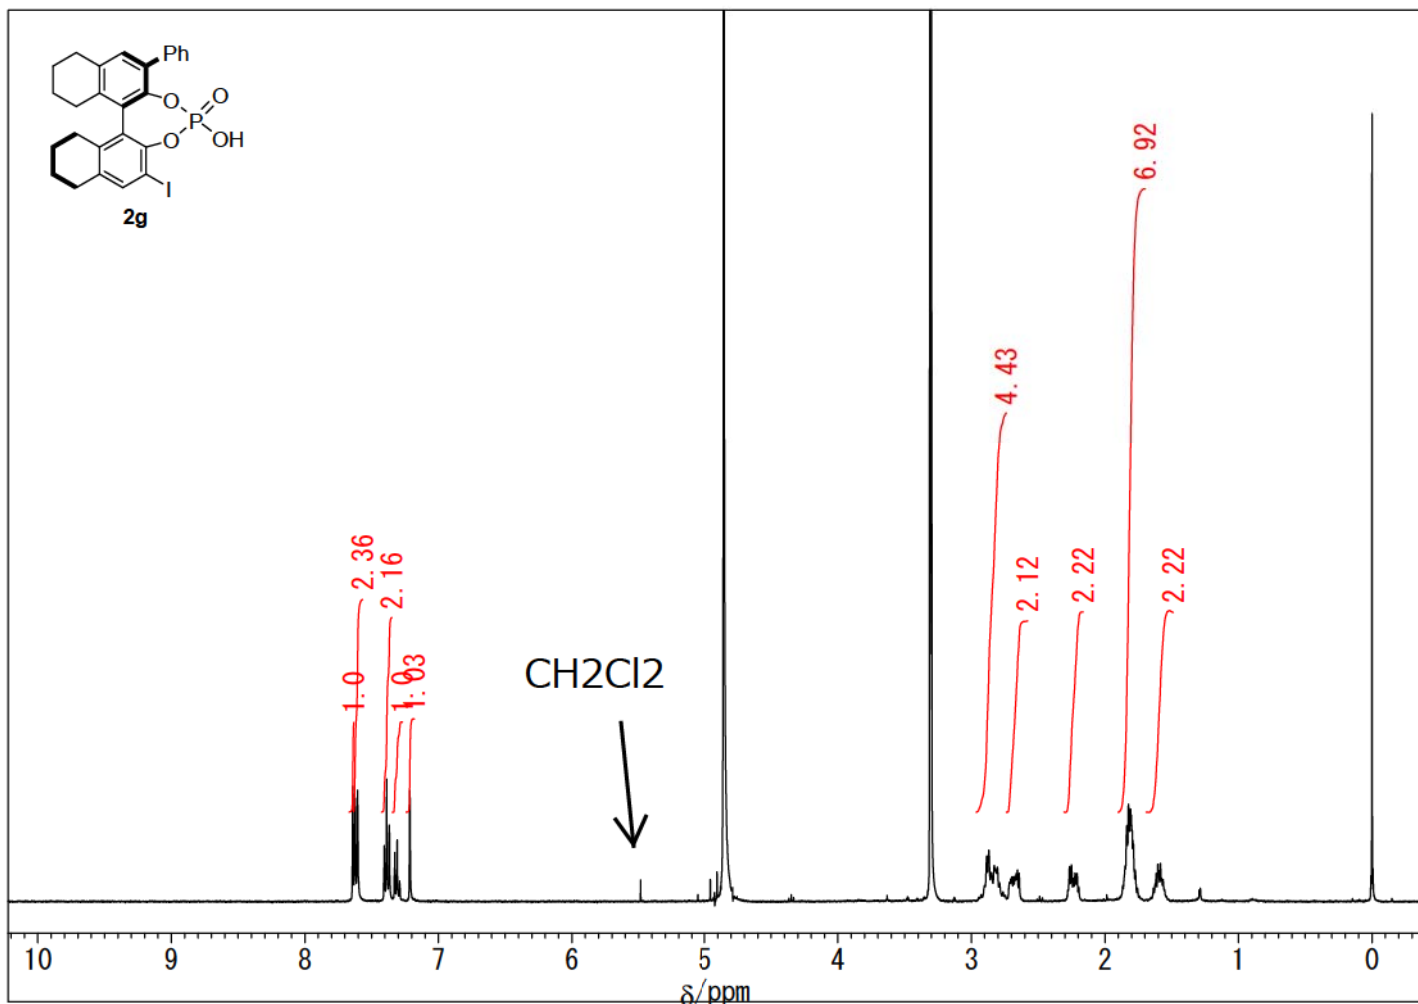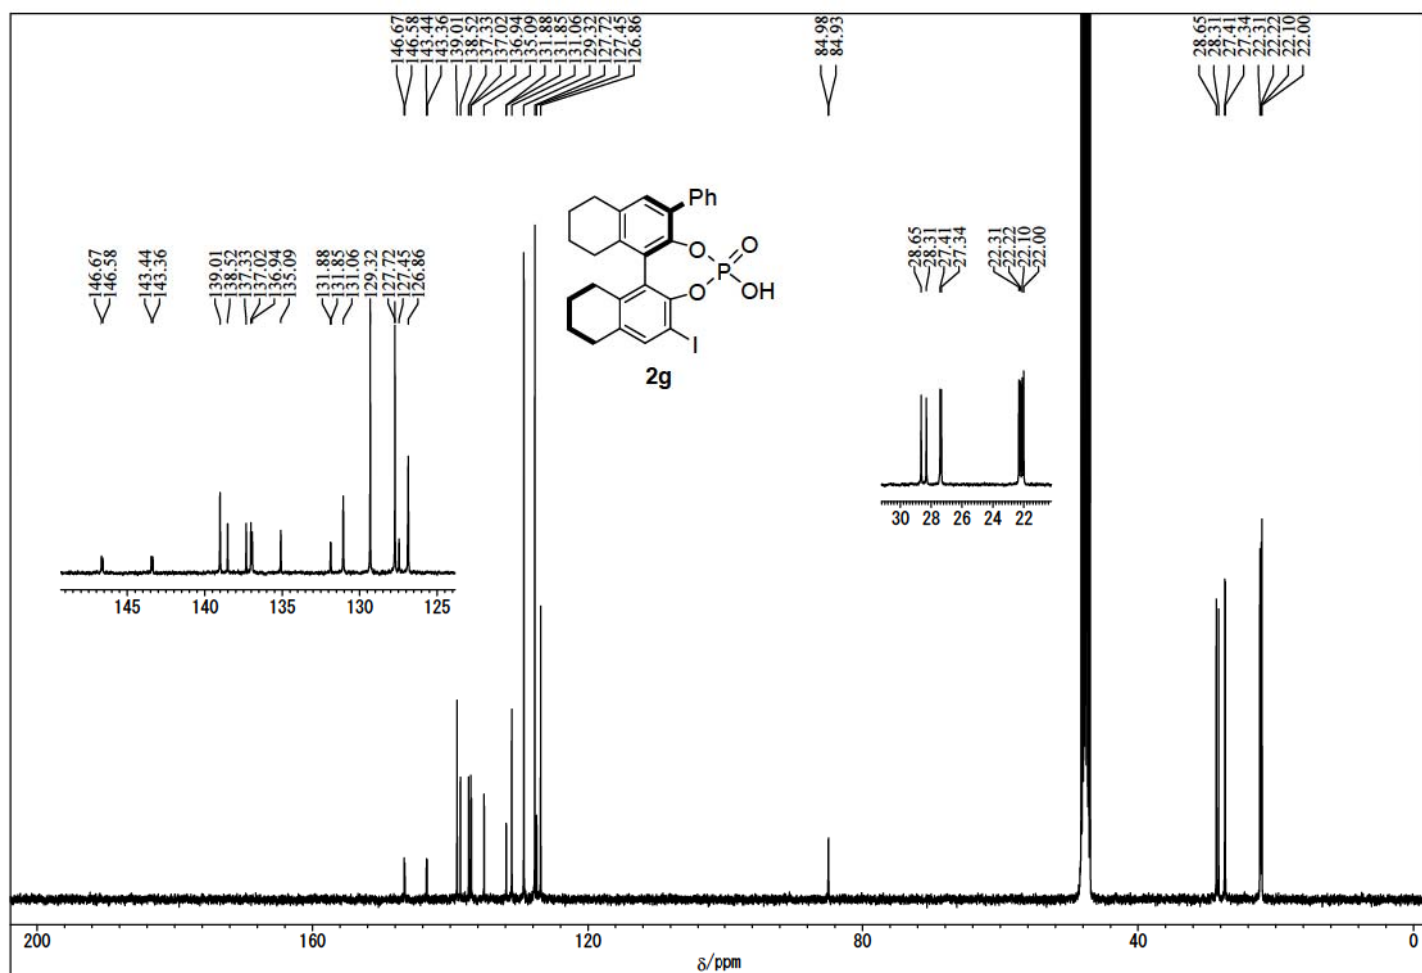

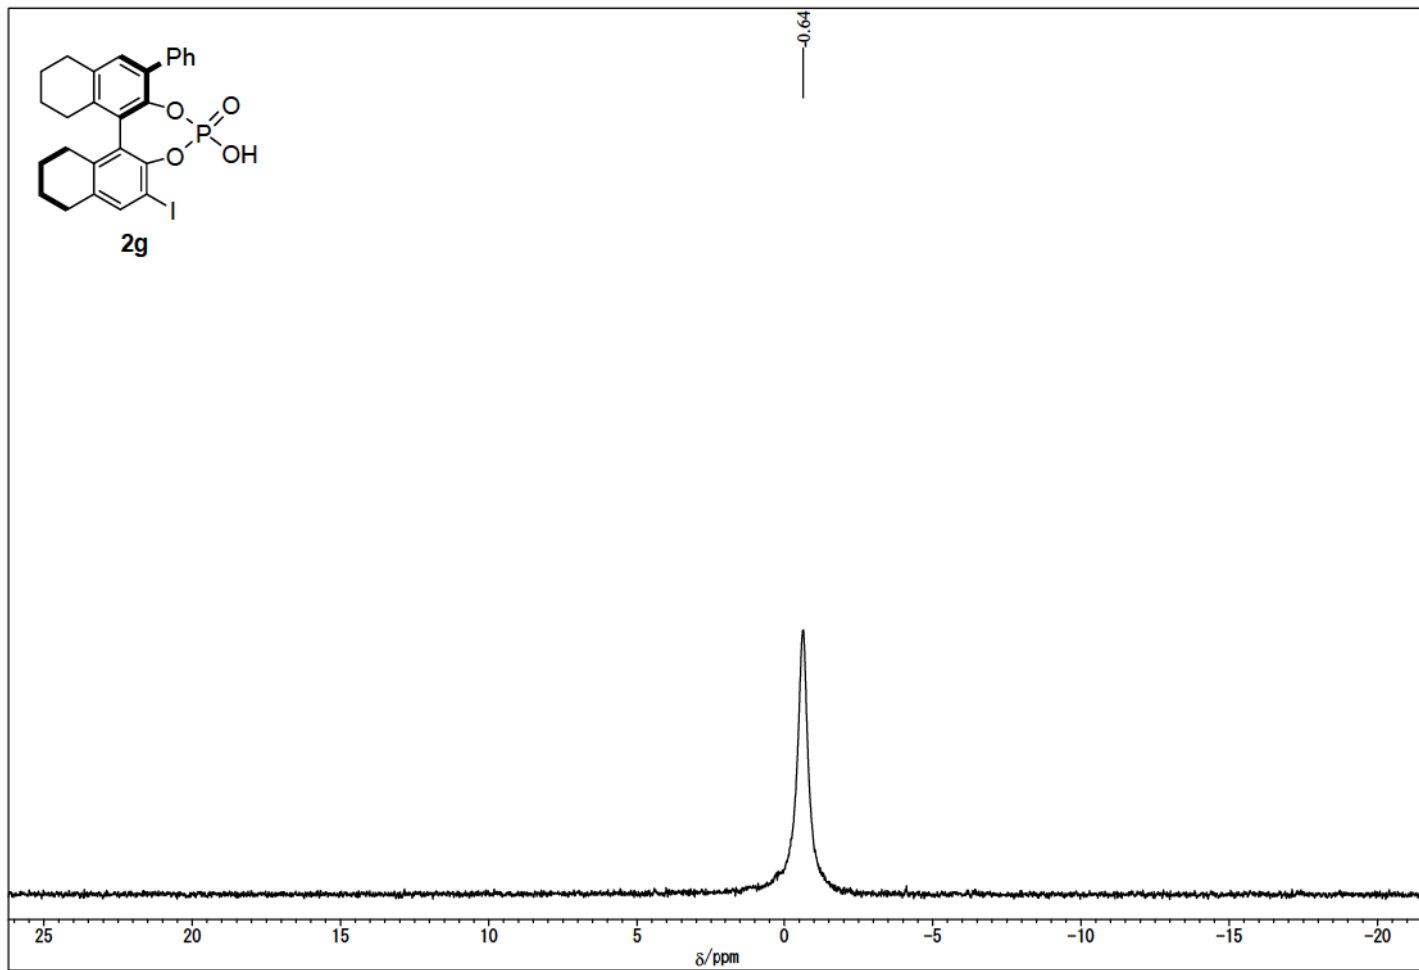

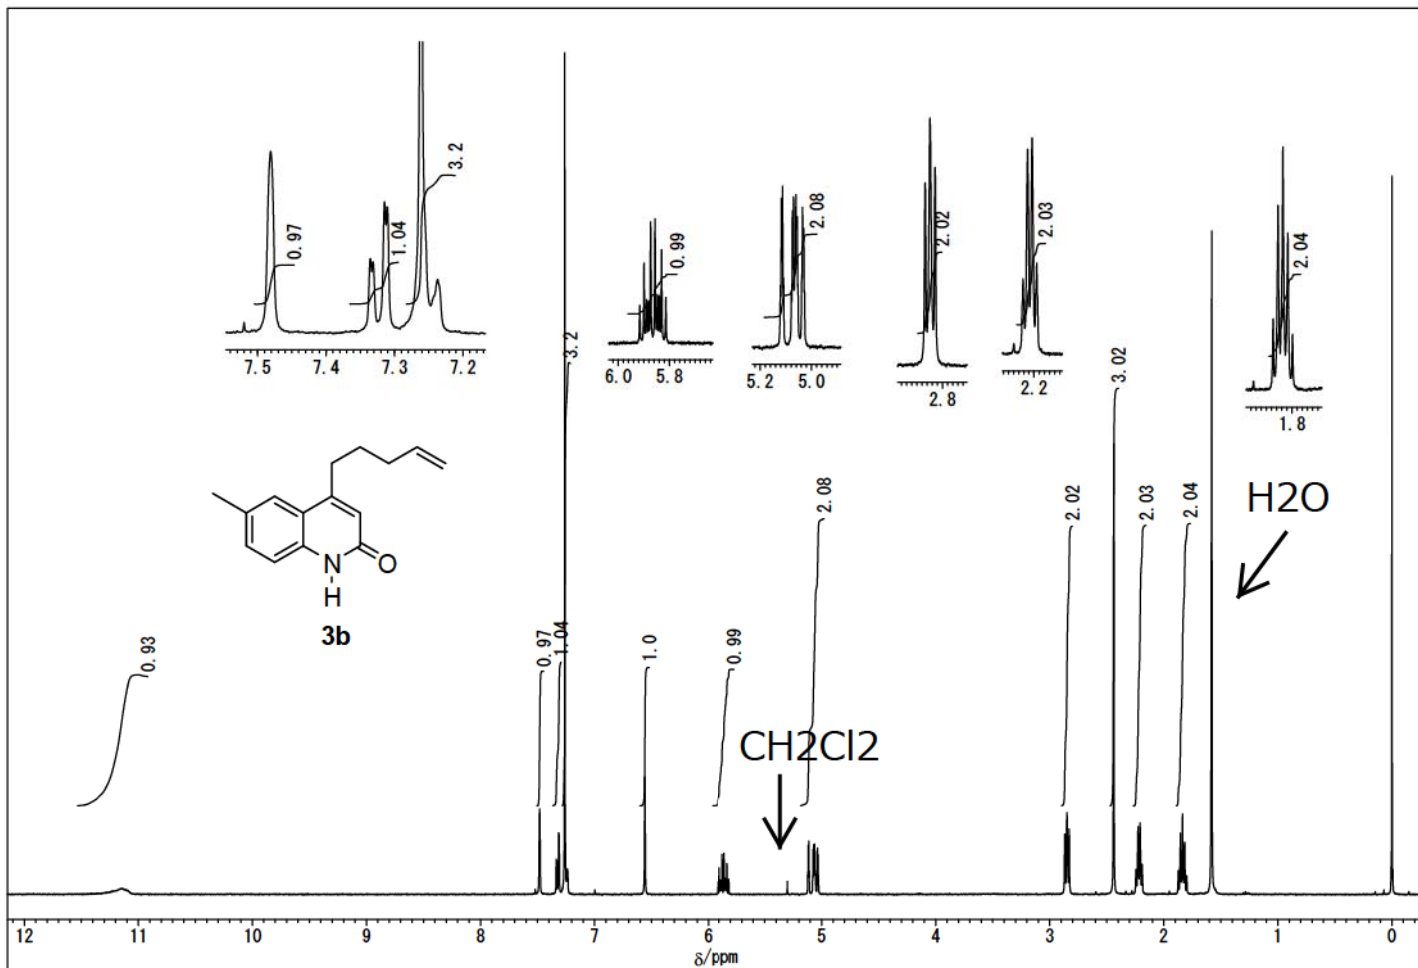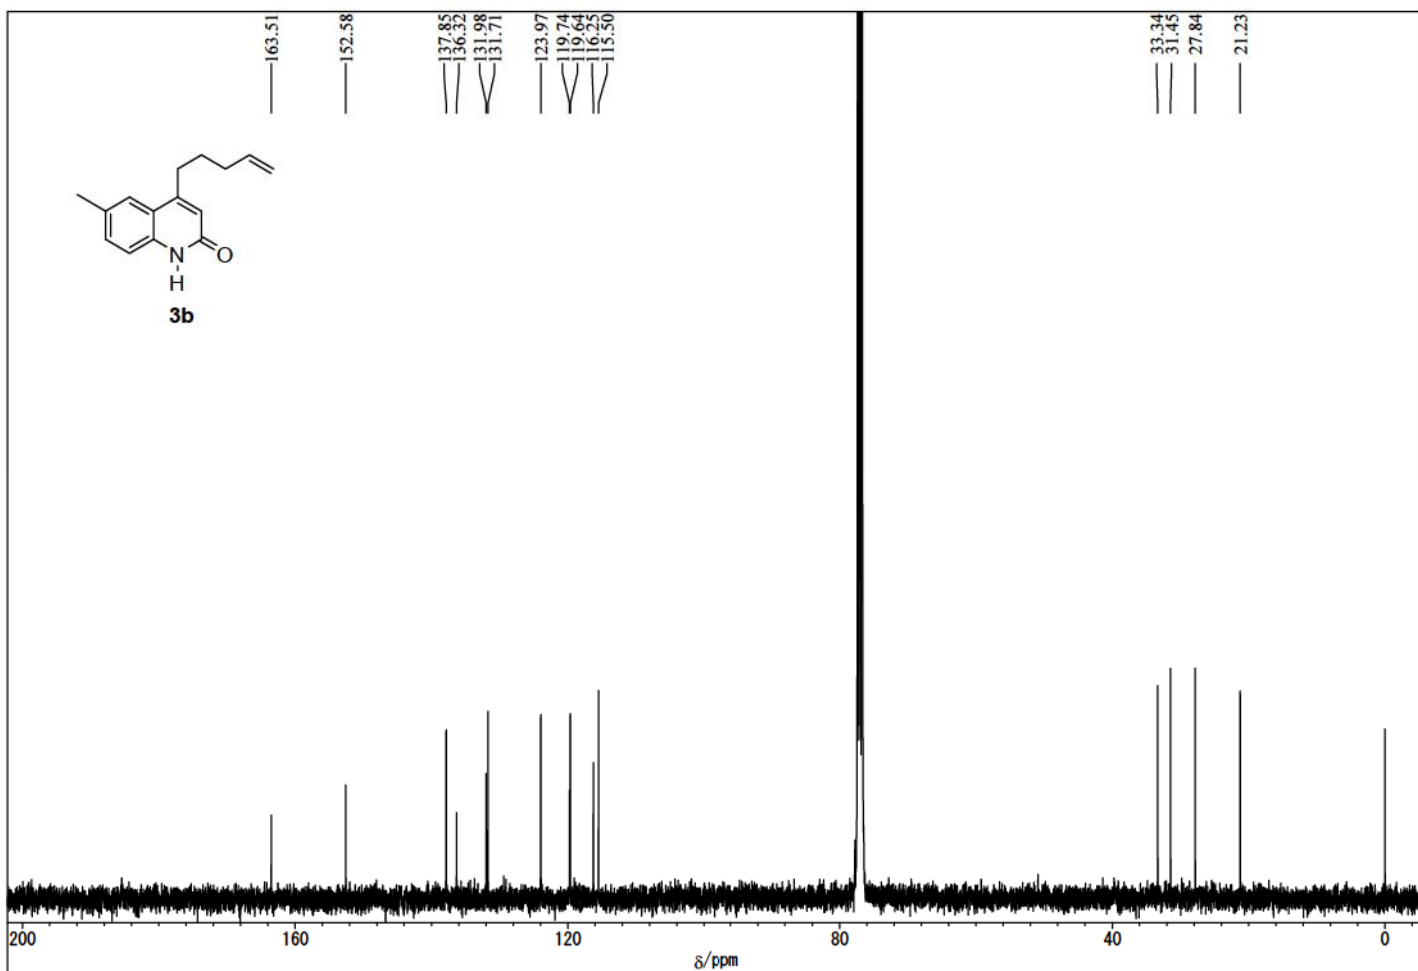

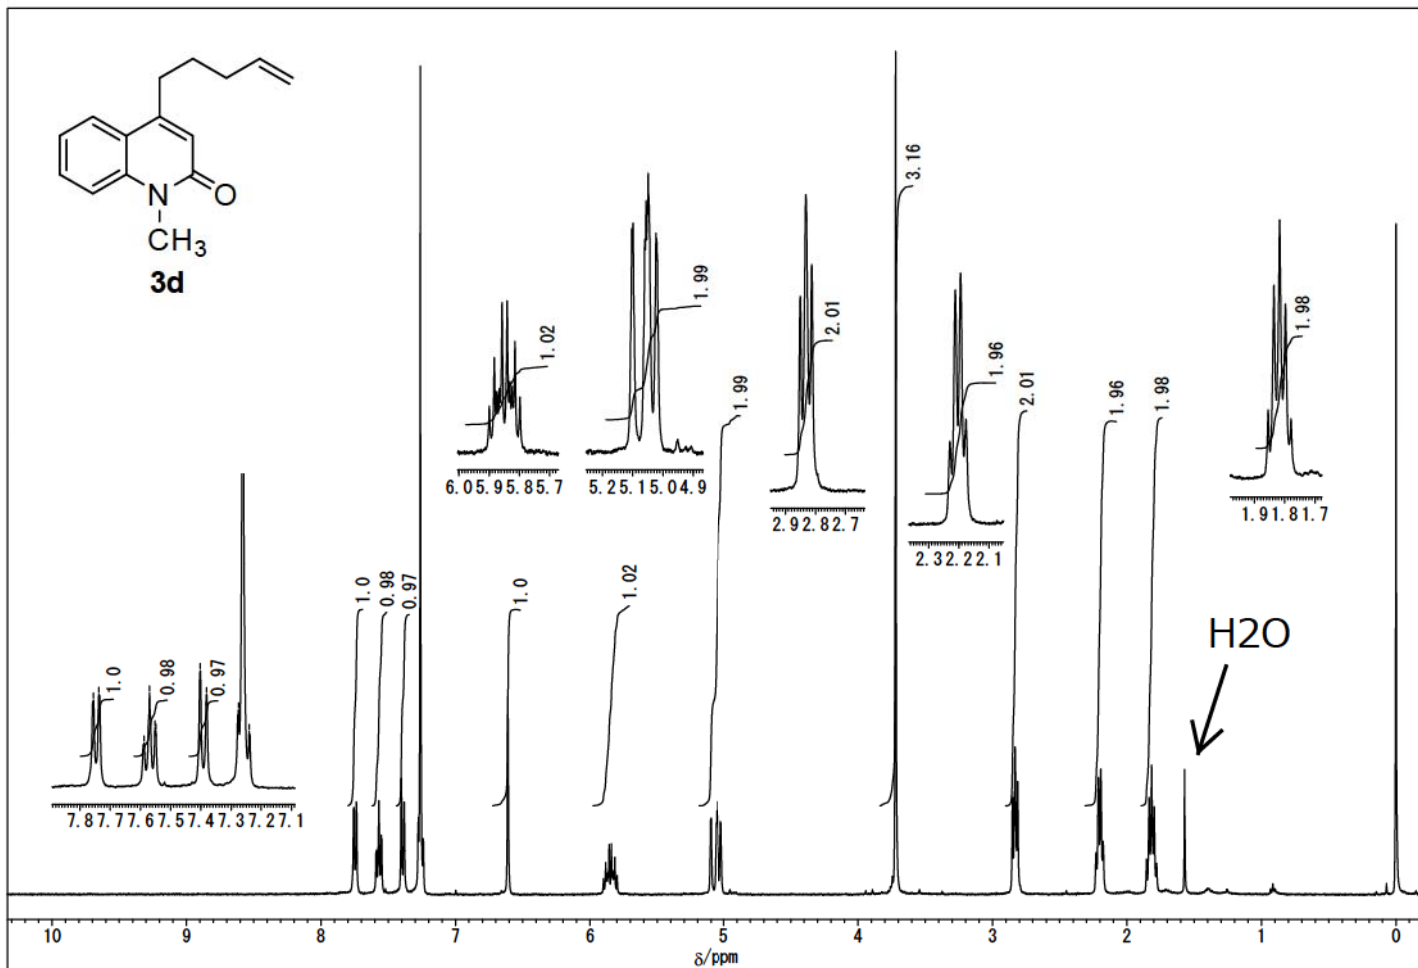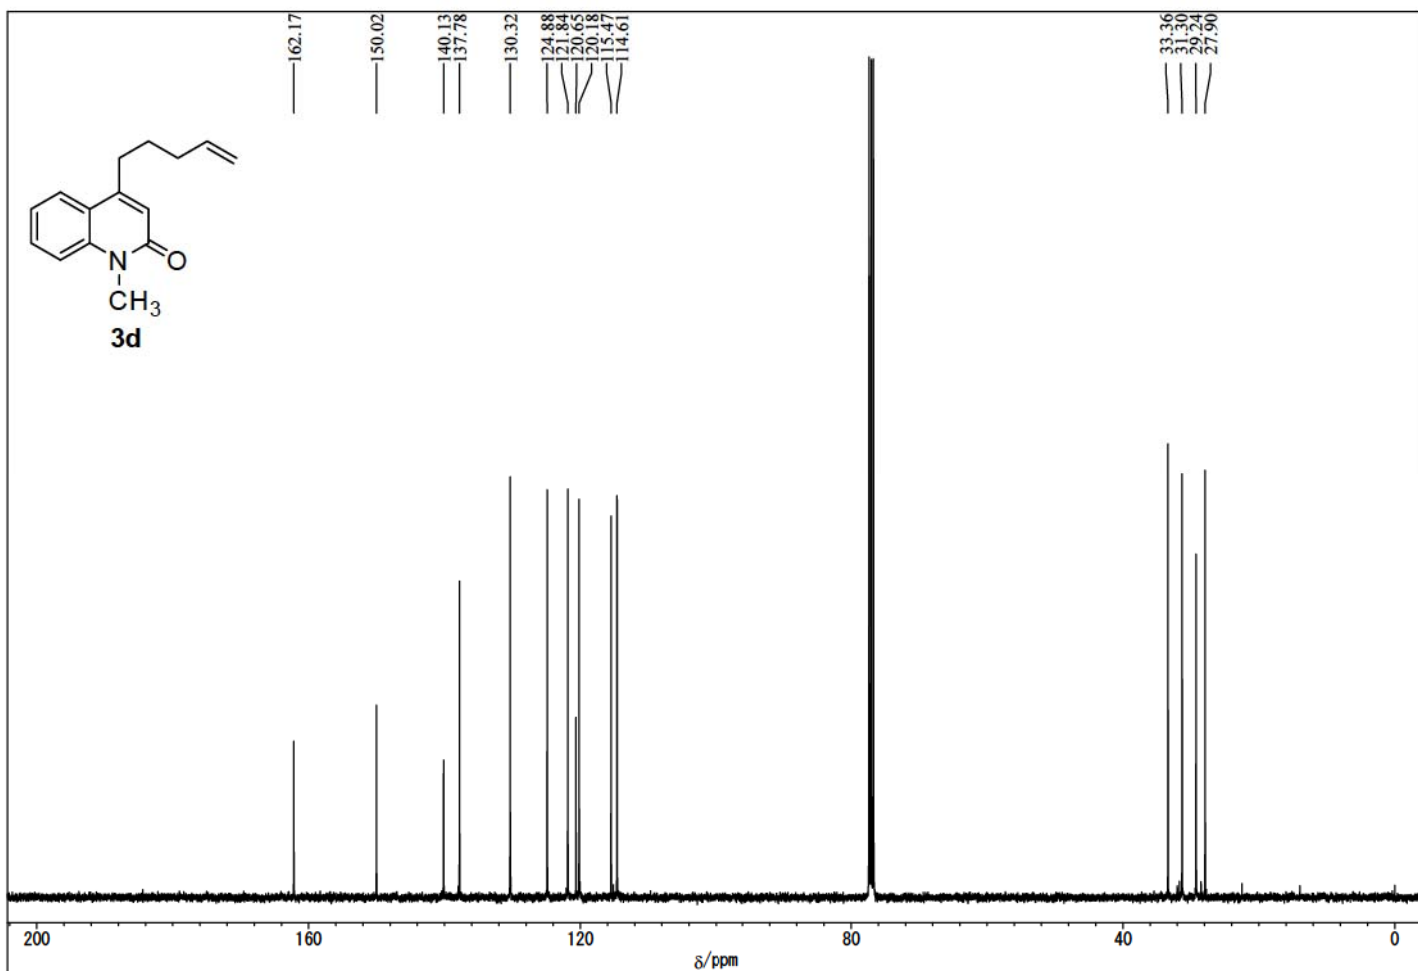

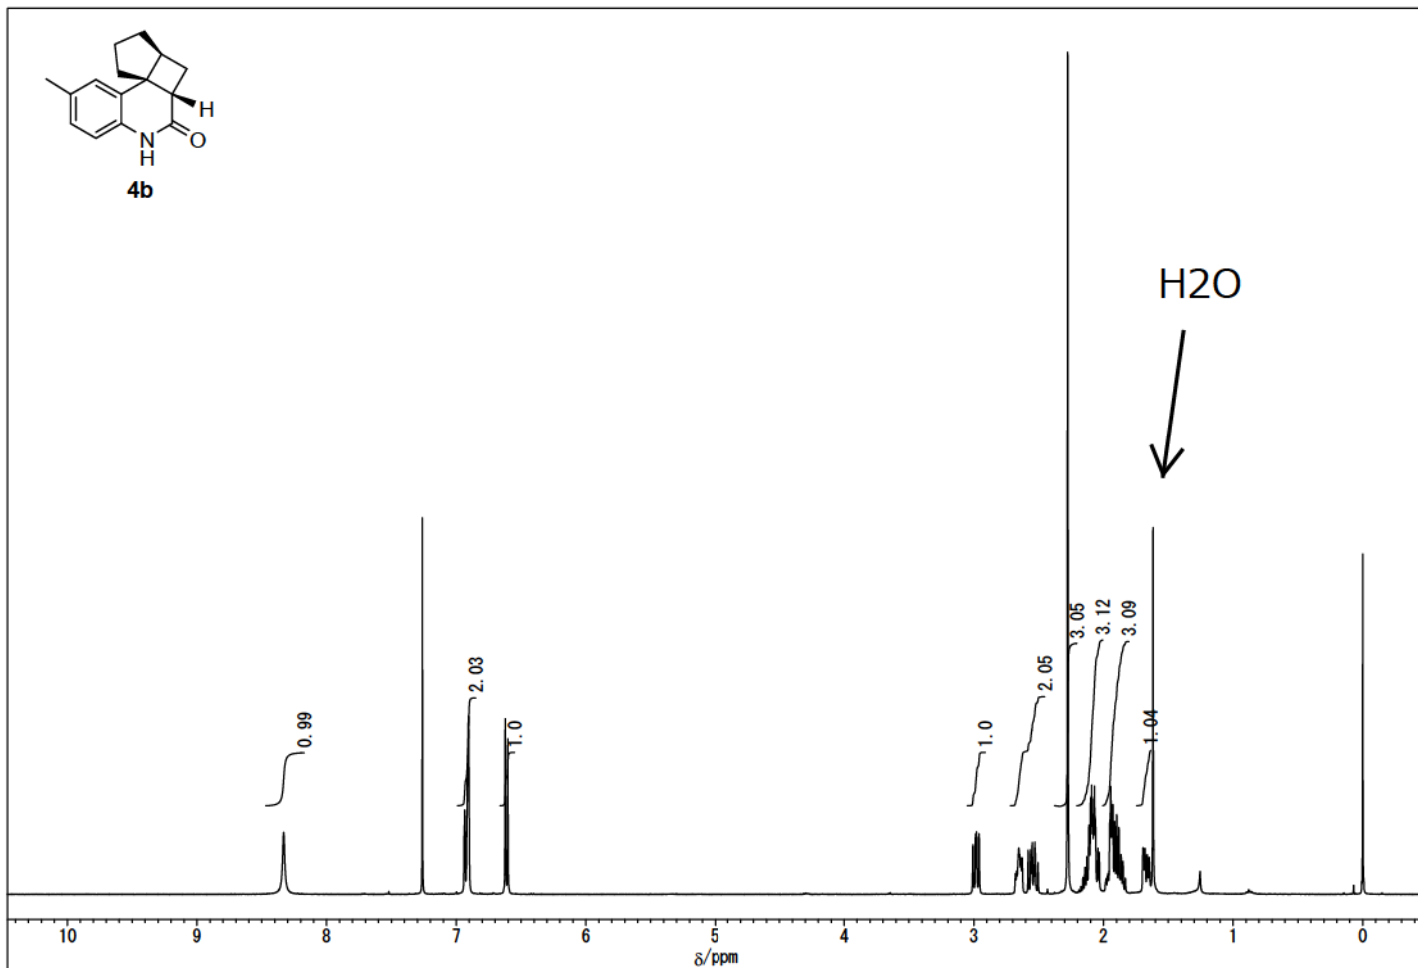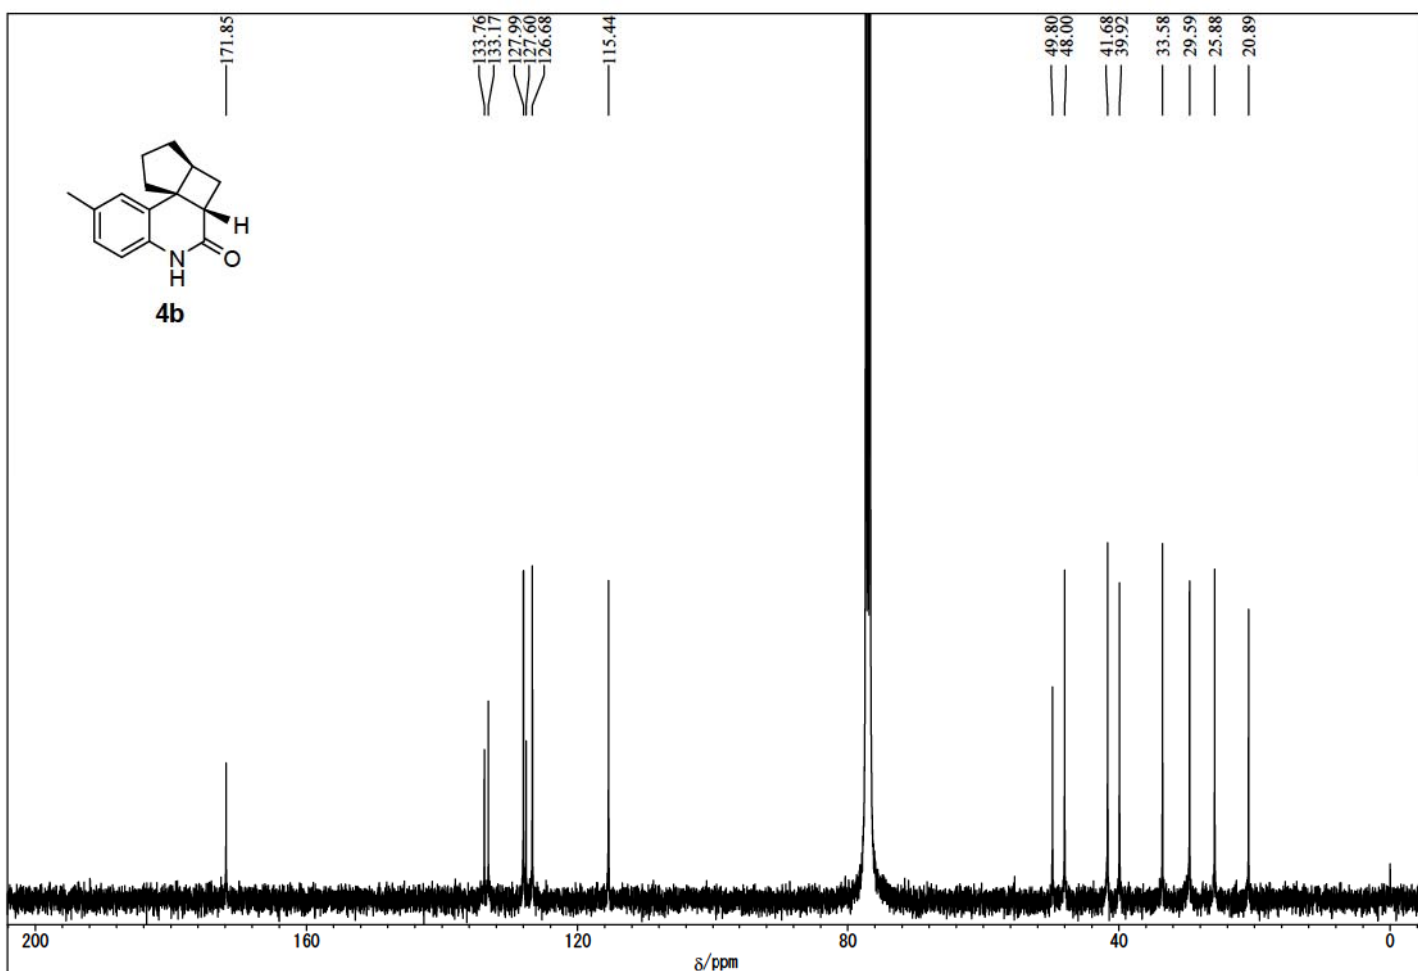



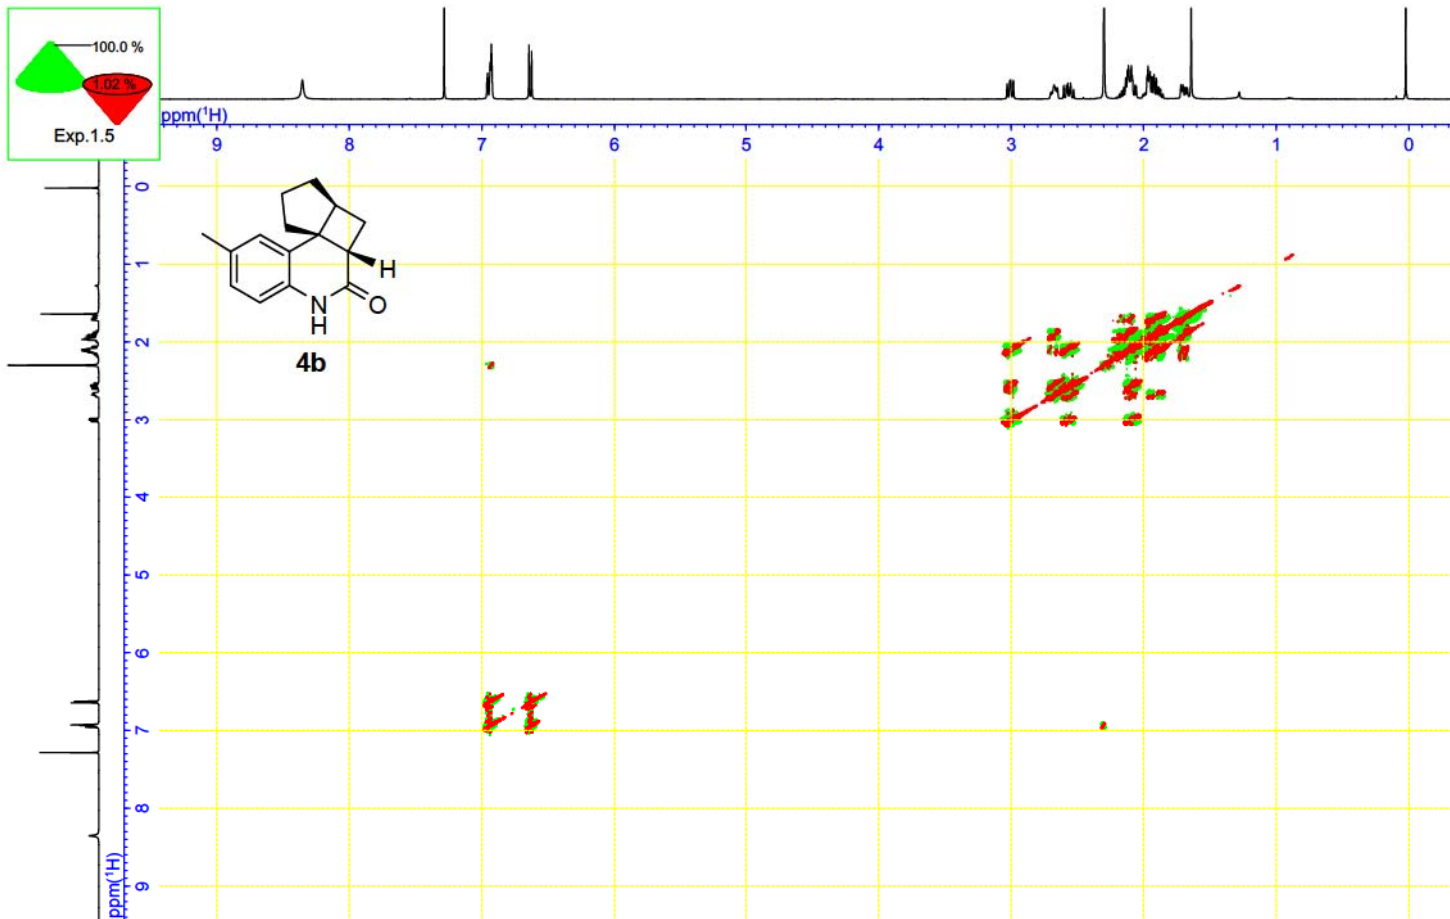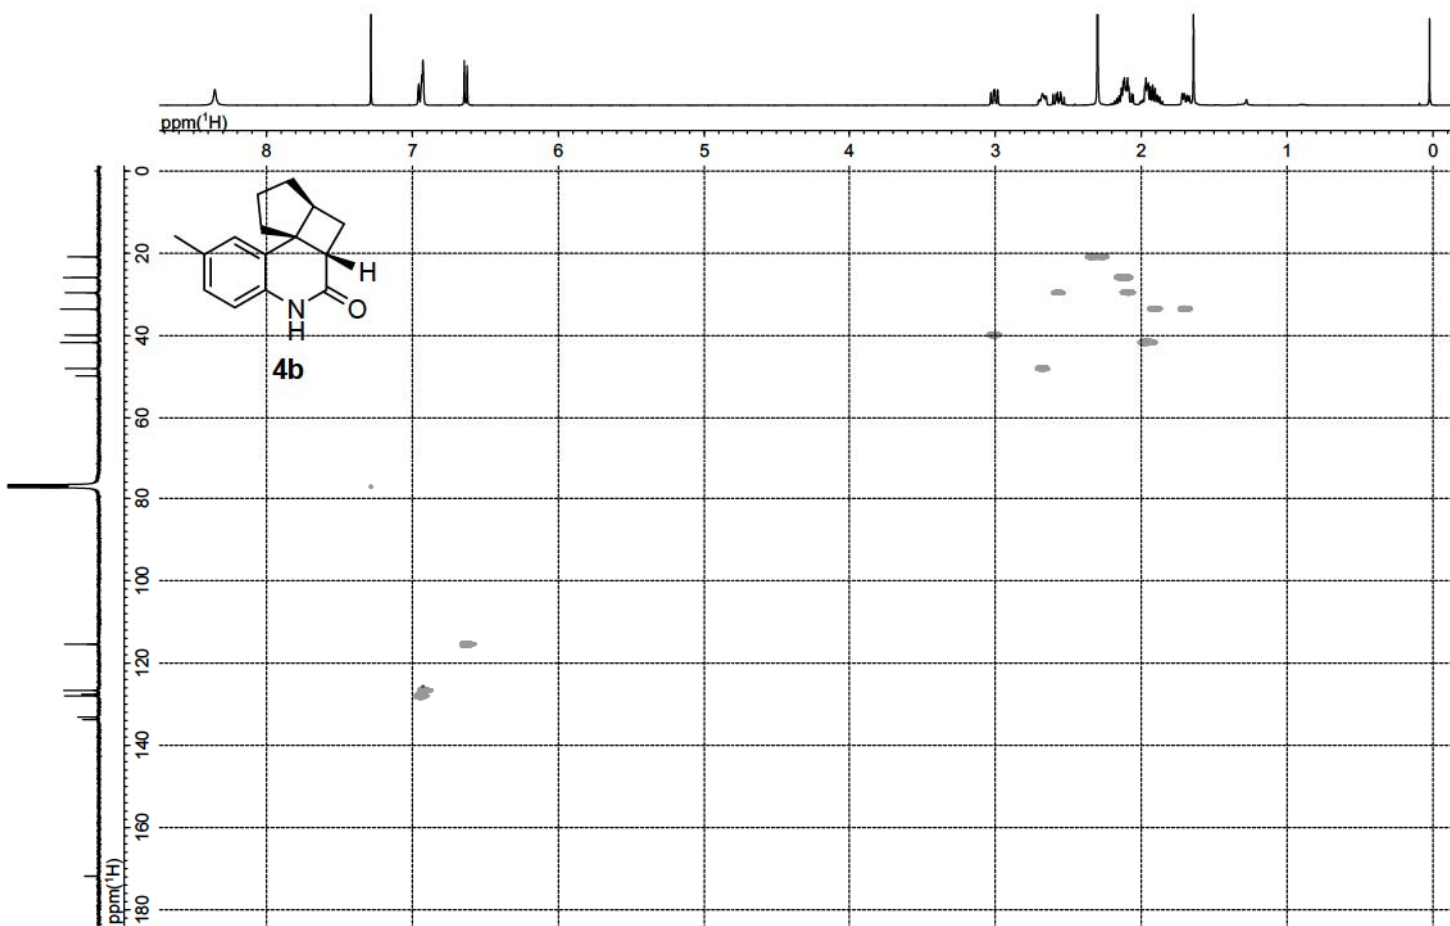

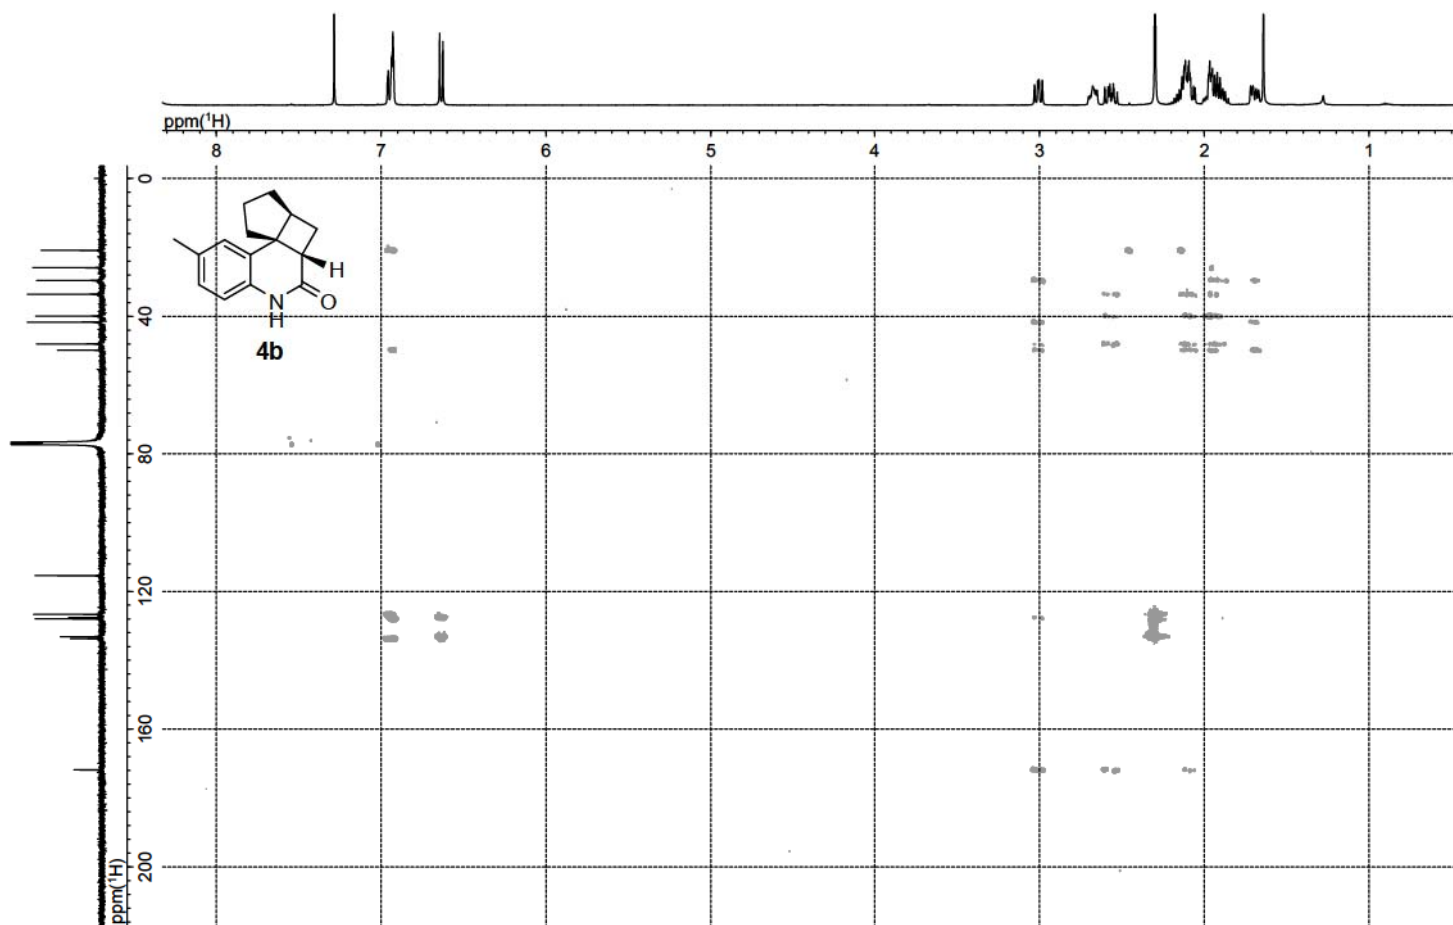

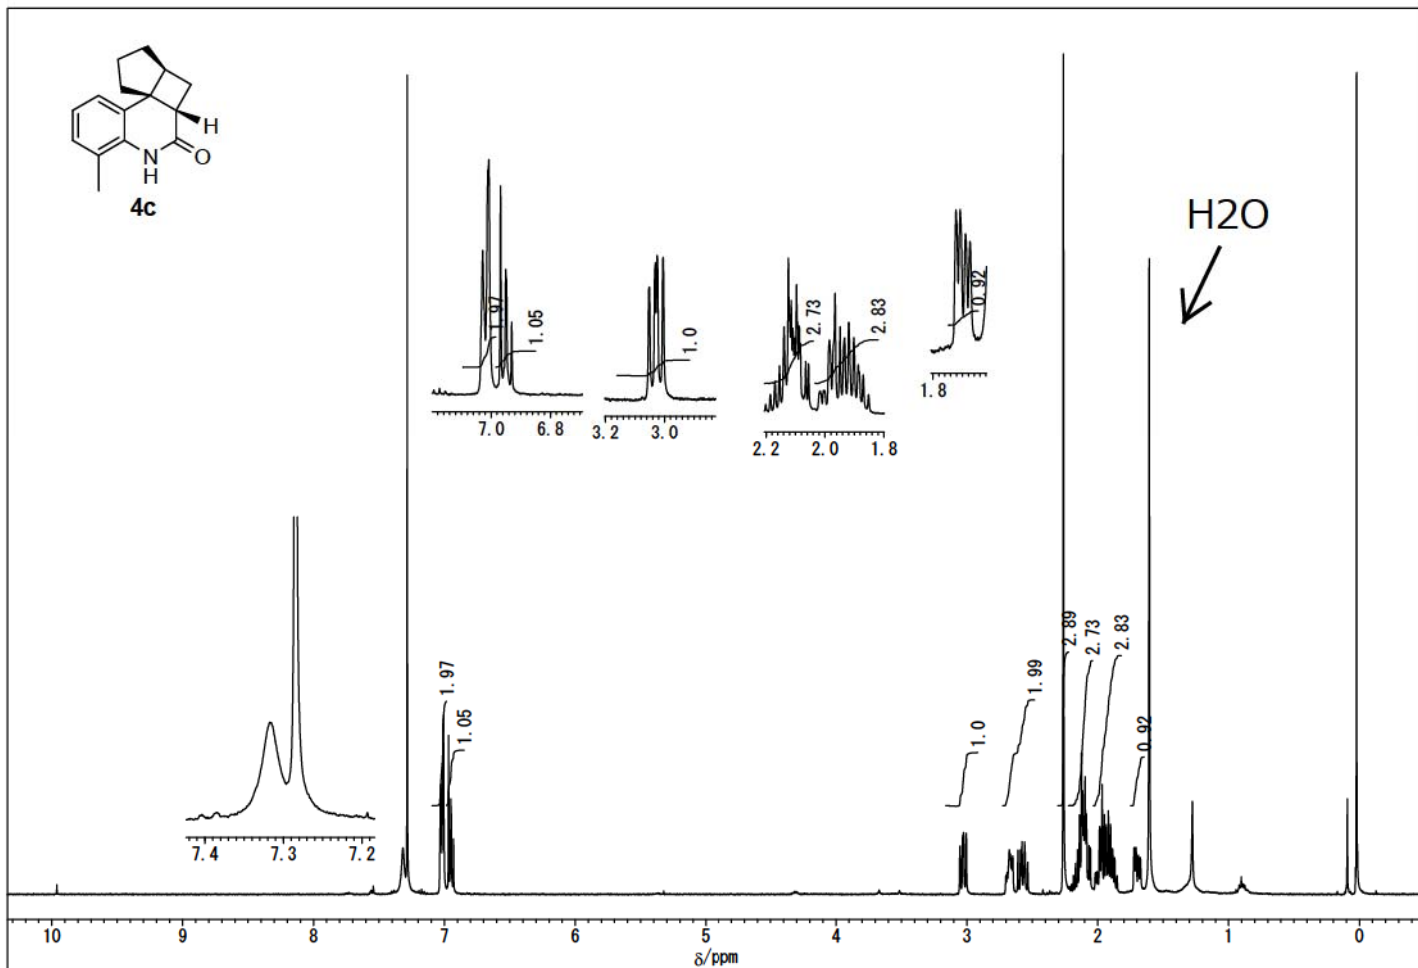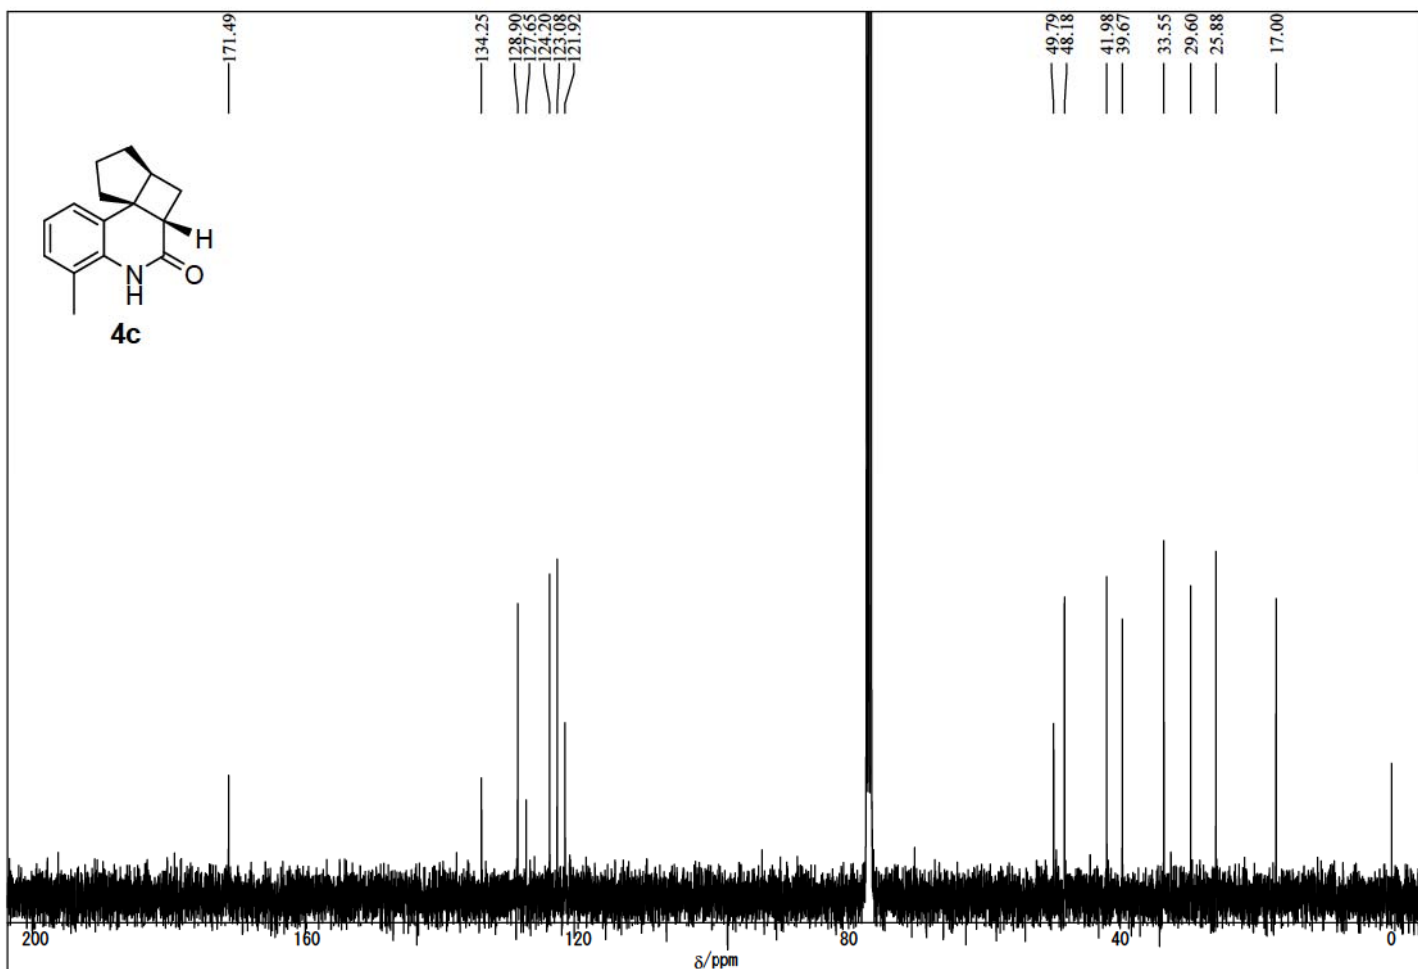

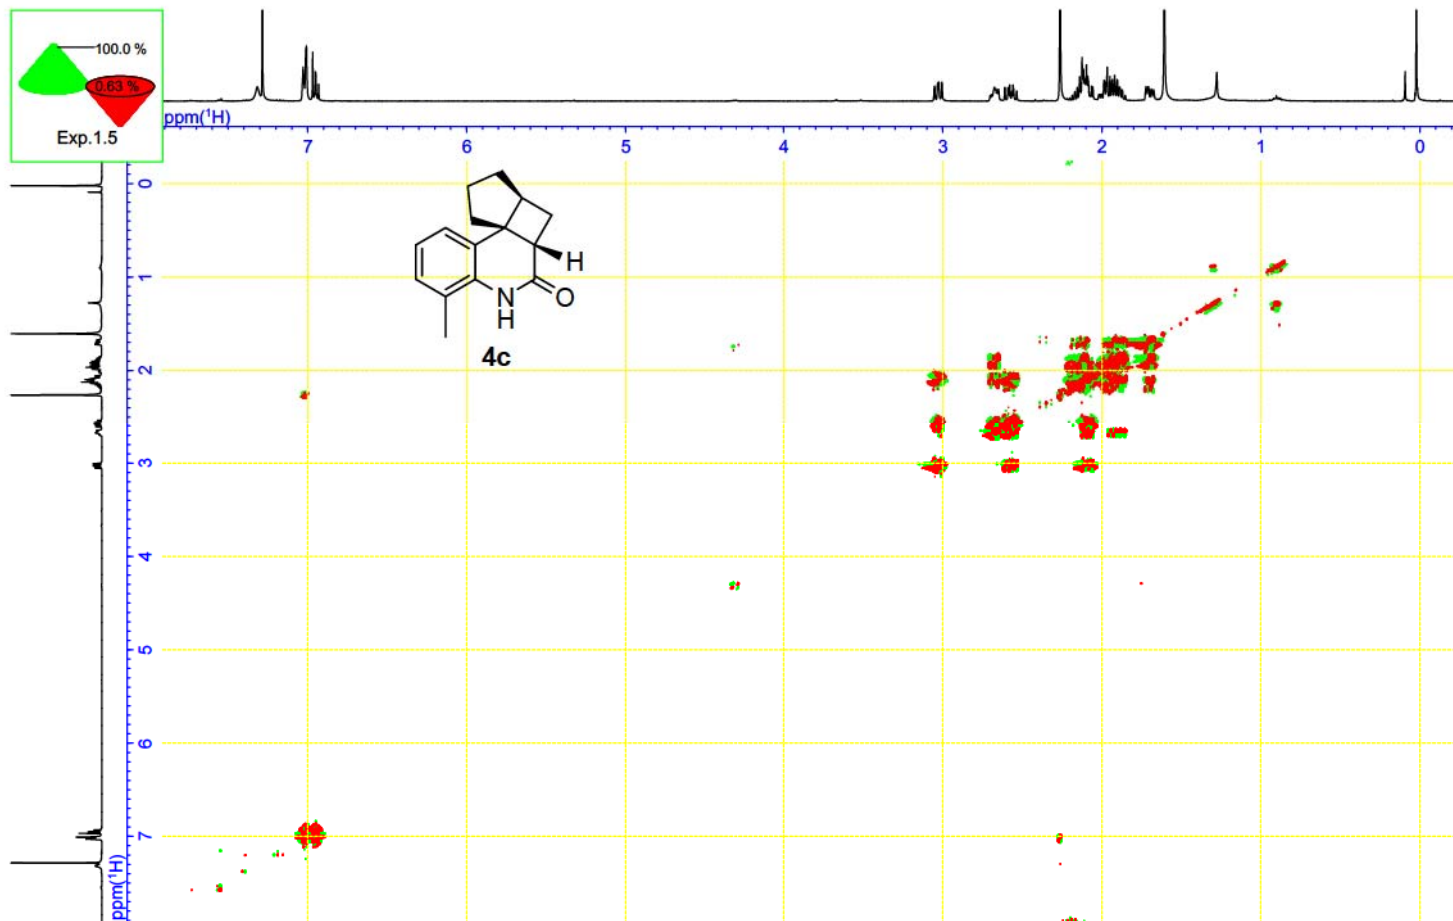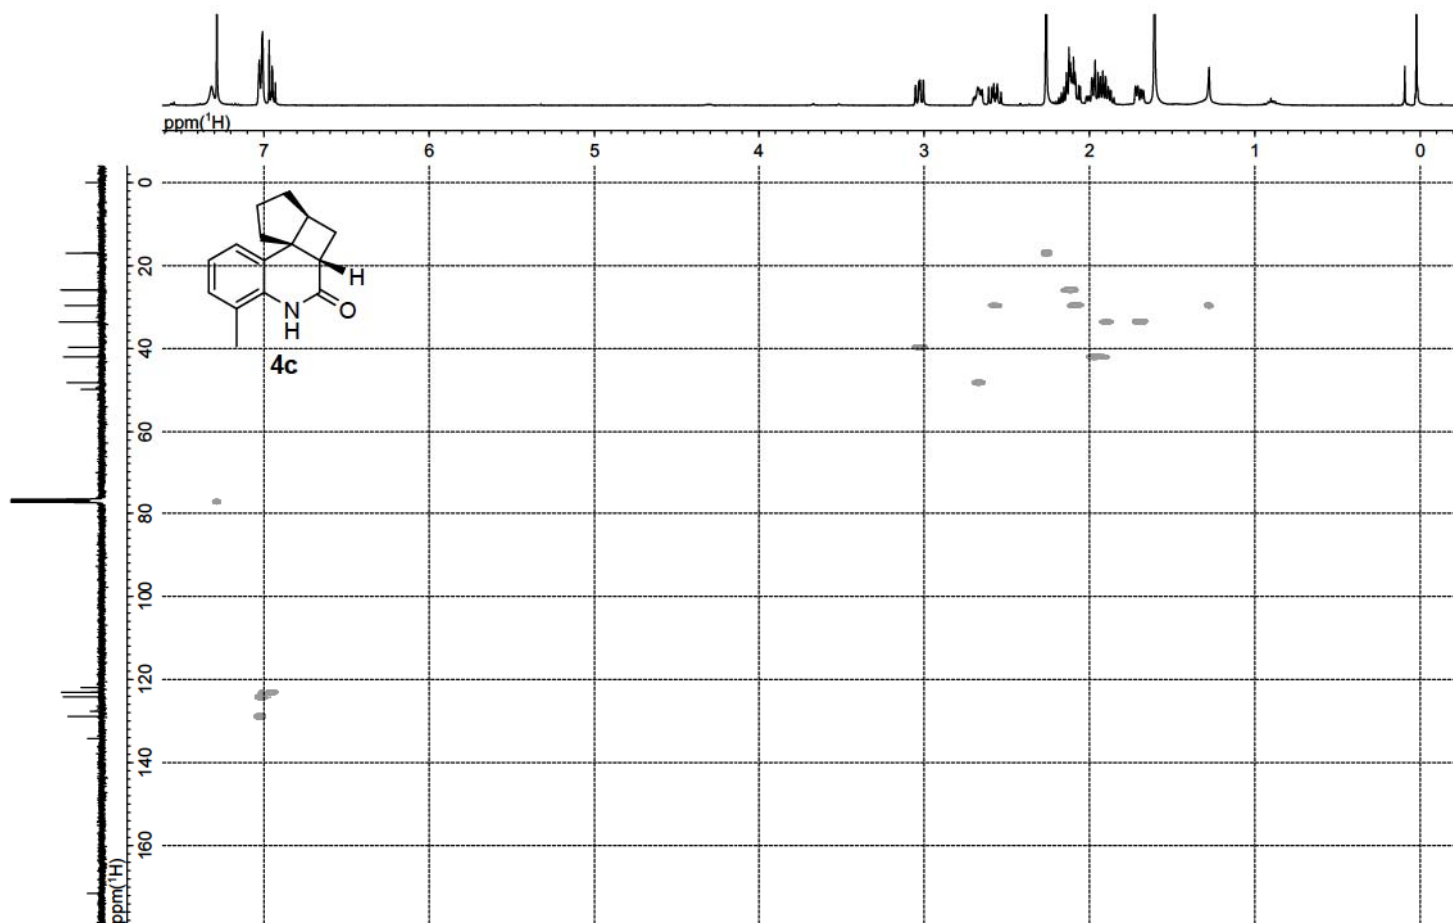

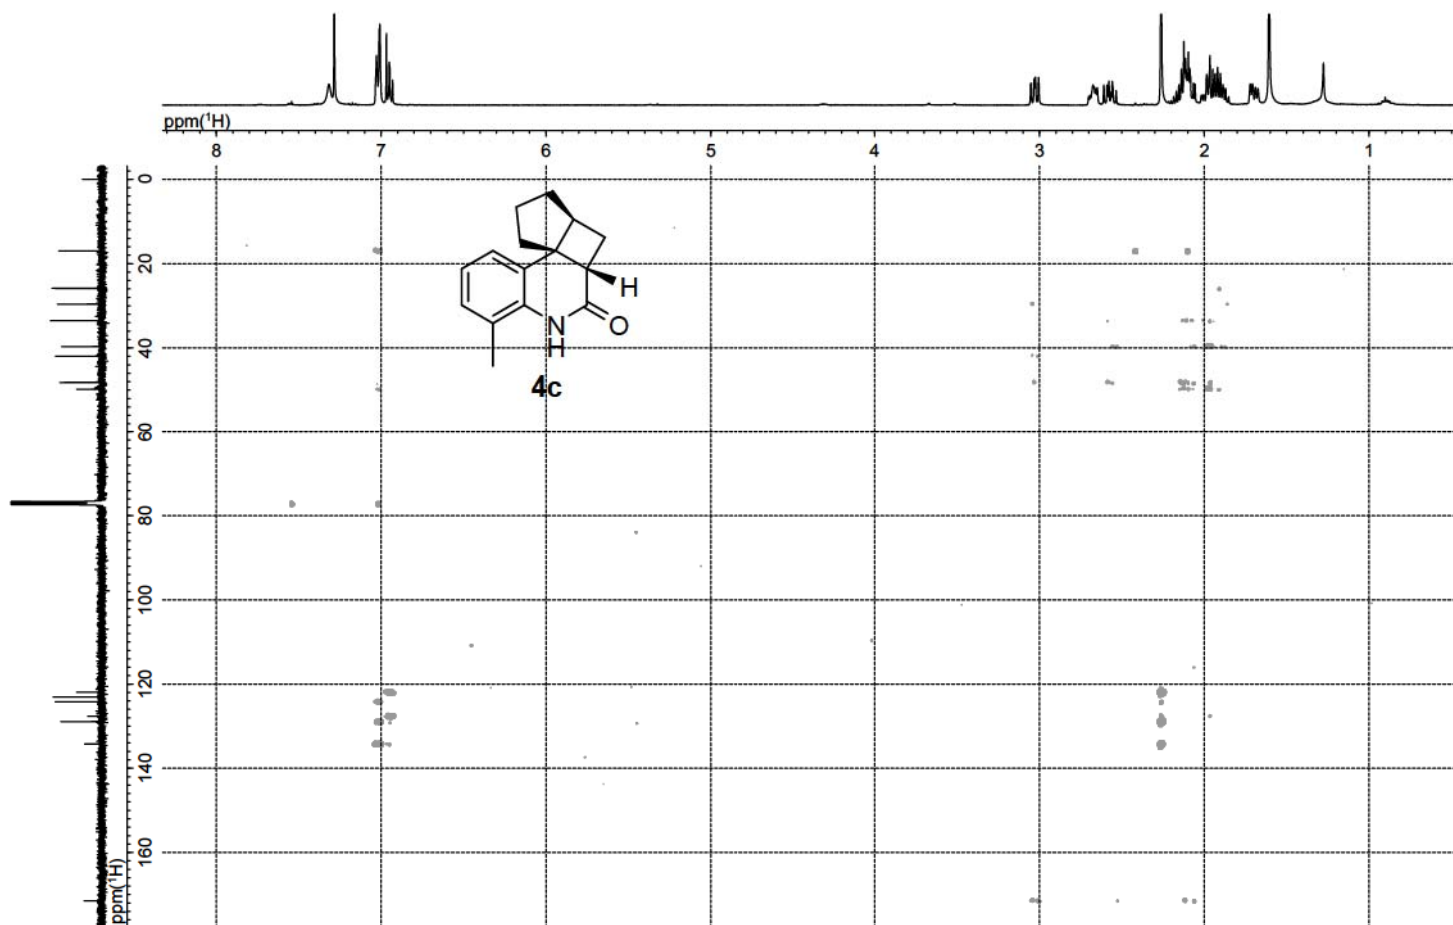

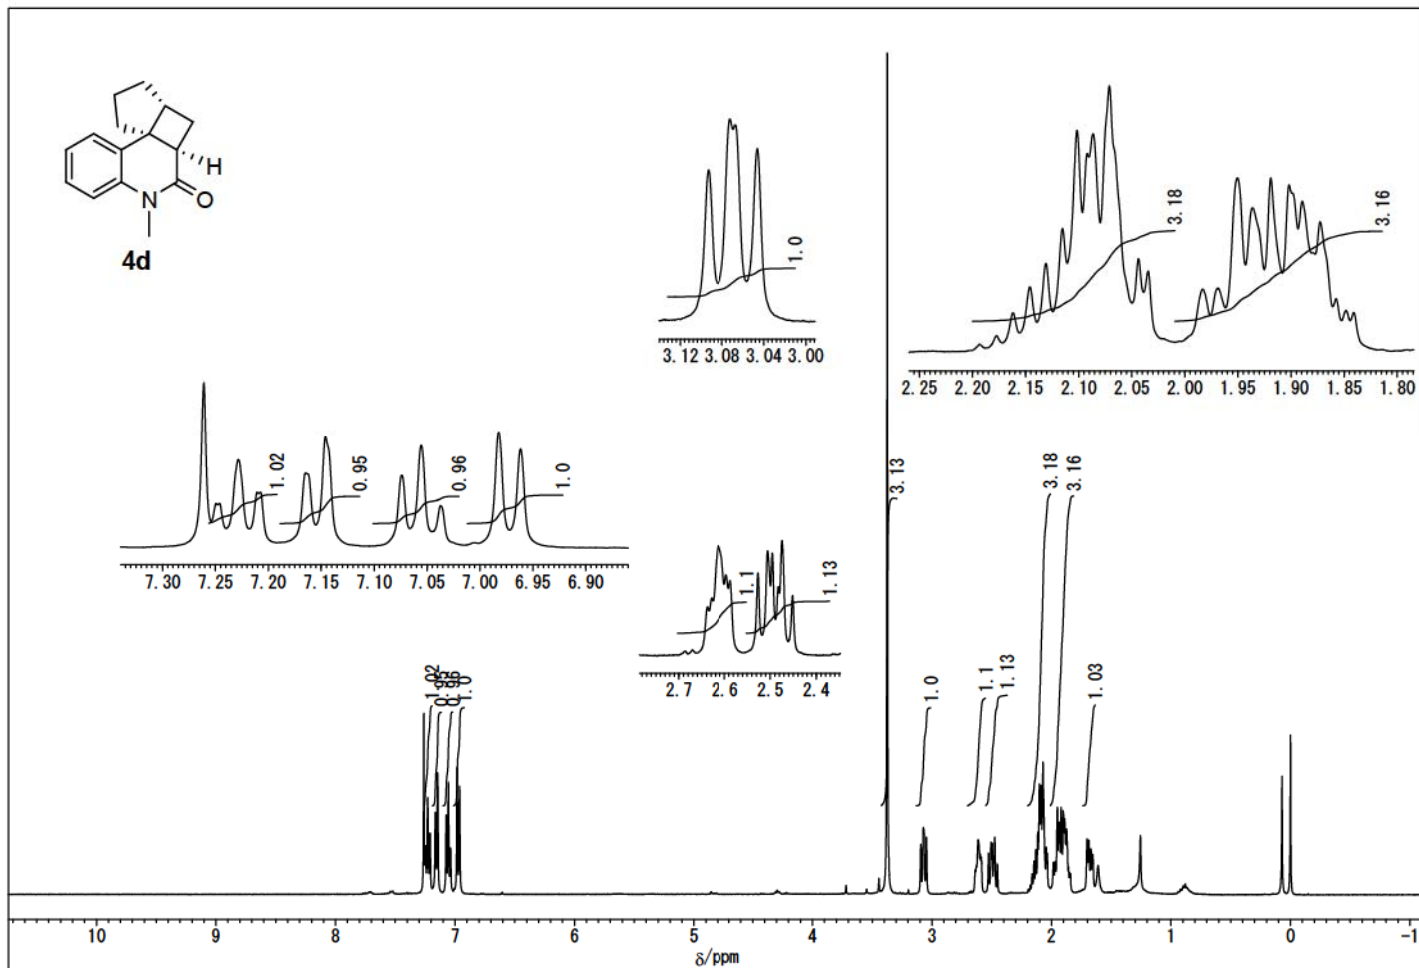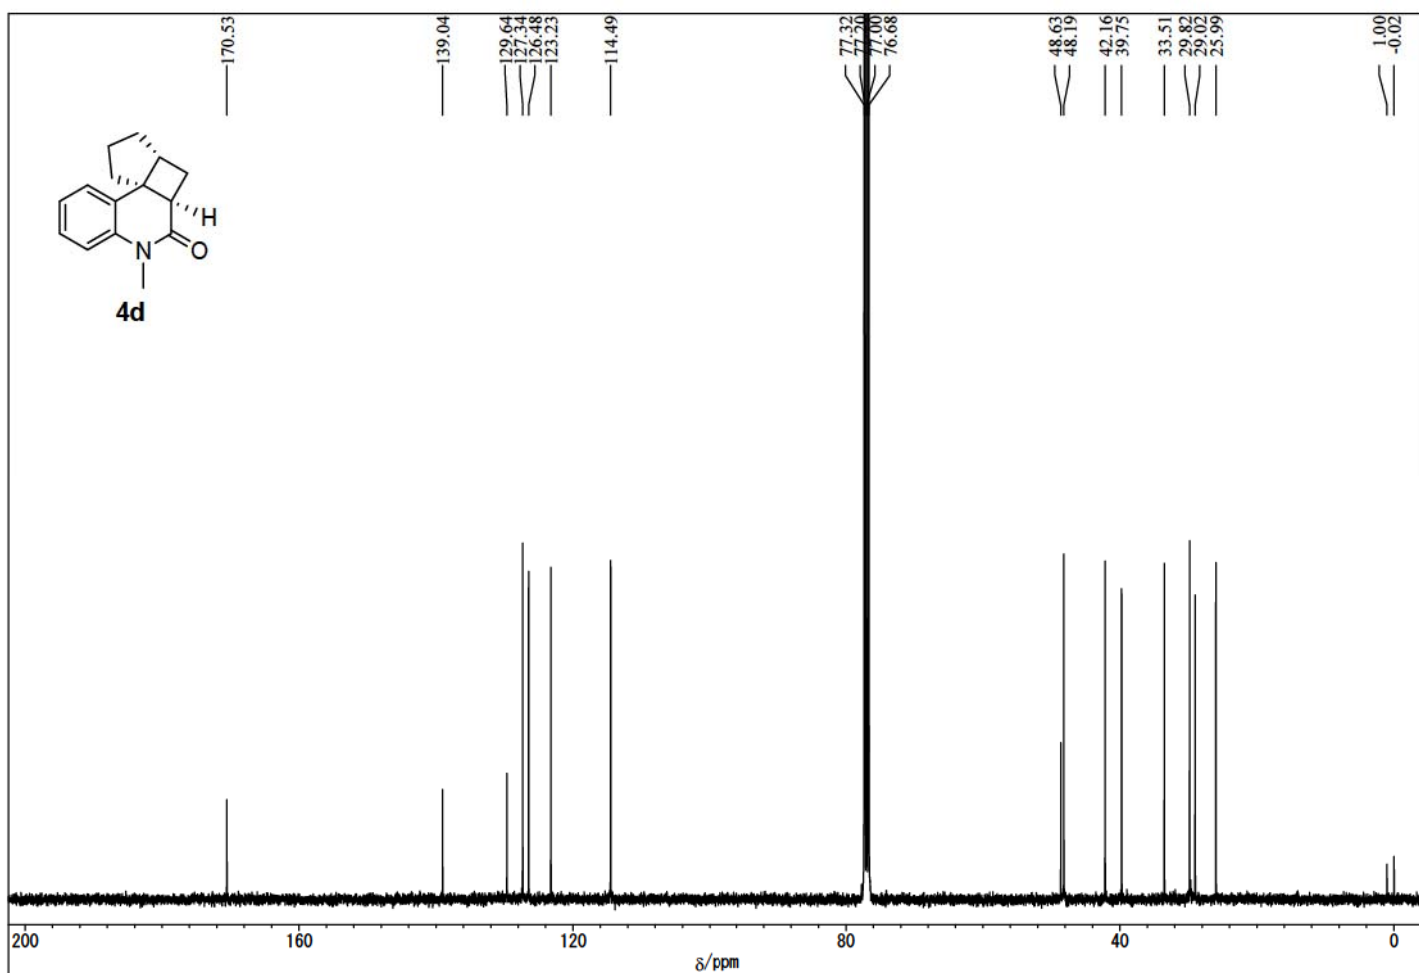

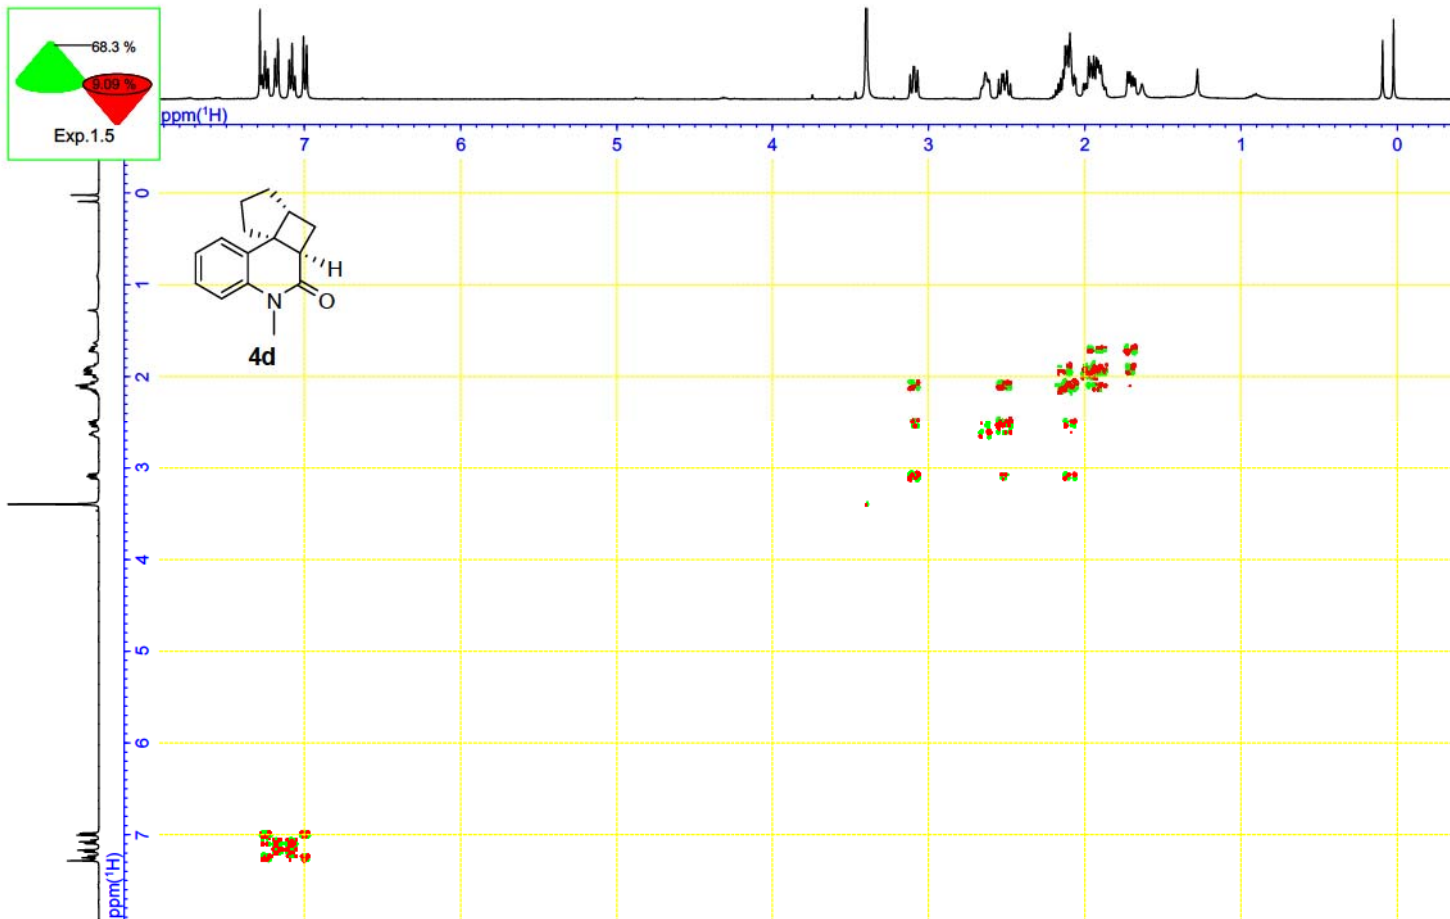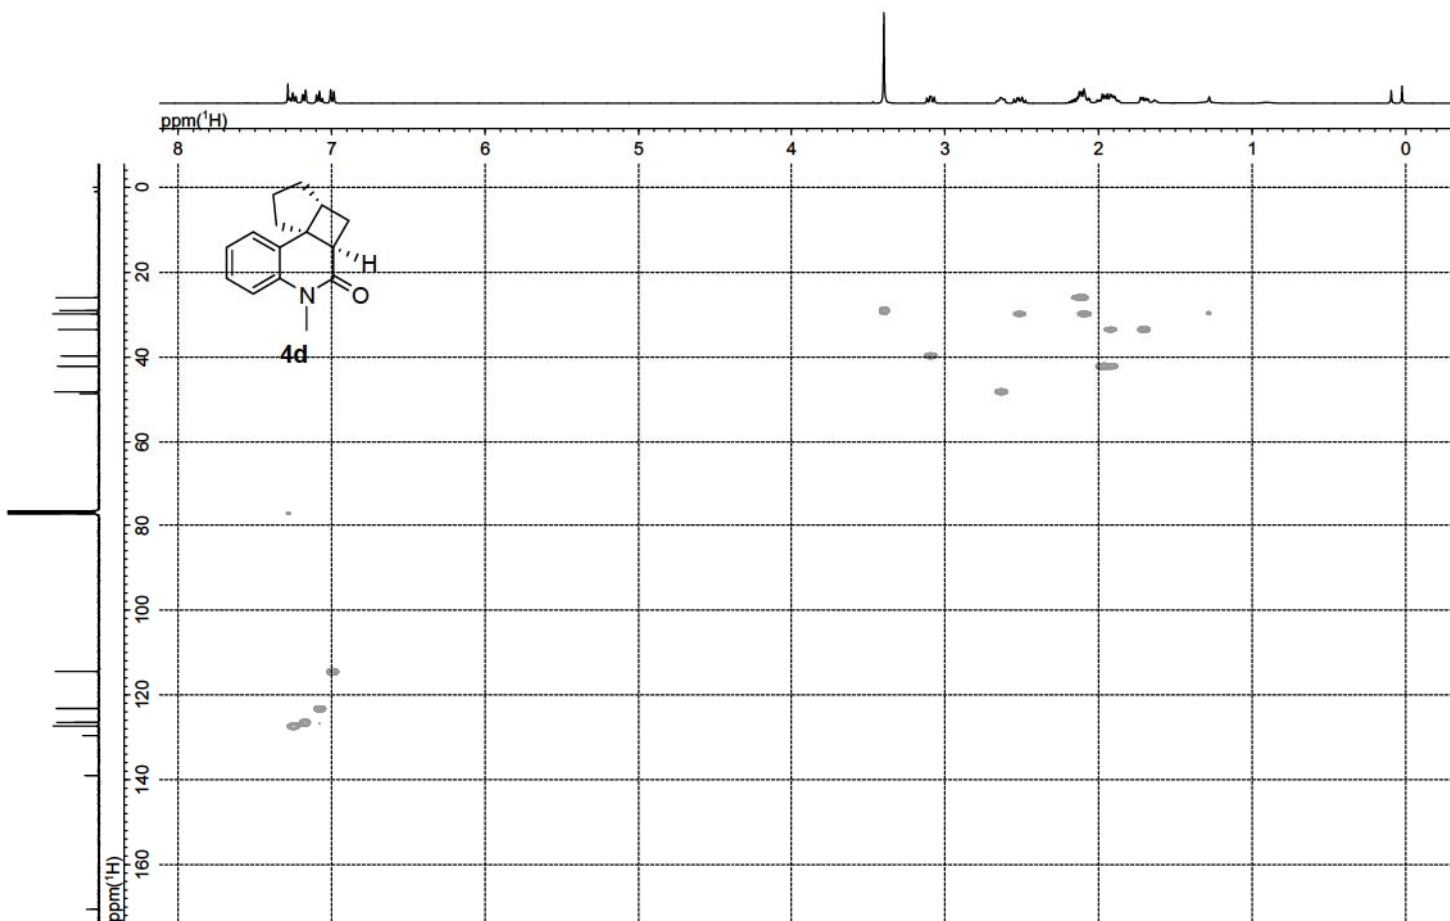

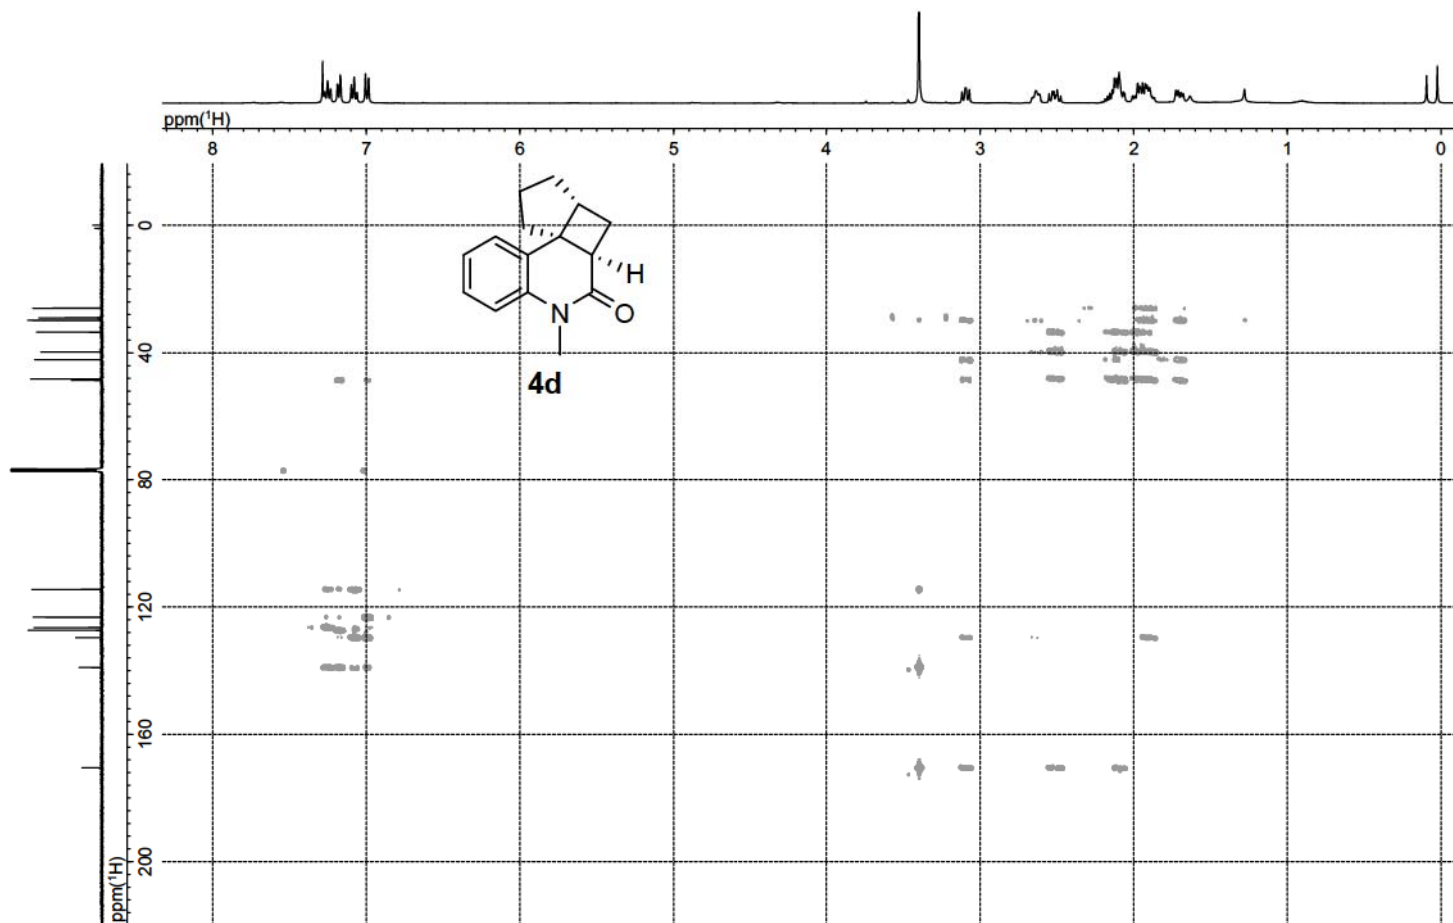

Supplement: d0ob02054k1.pdf [file d0ob02054k1.pdf]
